# Supplementary material for: A Scientometric Systematic Review of Entrepreneurial Wellbeing Knowledge Production
Source: Front Psychol. 2021 Mar 31;12:641465. doi: 10.3389/fpsyg.2021.641465 (PMC8044348; doi:10.3389/fpsyg.2021.641465)
Supplement: Supplementary file 2 [file Table_1.XLSX]

## Sheet: Hoja1
PT	AU	BA	BE	GP	AF	BF	CA	TI	SO	SE	BS	LA	DT	CT	CY	CL	SP	HO	DE	ID	CL	AB	C1	RP	EM	RI	OI	FU	FX	CR	NR	TC	Z9	U1	U2	PU	PI	PA	SN	EI	BN	J9	JI	PD	PY	VL	IS	PN	SU
J	Olsson, P; Folke, C; Hahn, T				Olsson, P; Folke, C; Hahn, T			Social-ecological transformation for ecosystem management: the development of adaptive co-management of a wetland landscape in southern Sweden	ECOLOGY AND SOCIETY			English	Article							RESILIENCE; KNOWLEDGE		We analyze the emergence of an adaptive co-management system for wetland landscape governance in southern Sweden, a process where unconnected management by several actors in the landscape was mobilized, renewed, and reconfigured into ecosystem management within about a decade. Our analysis highlights the social mechanisms behind the transformation toward ecosystem management. The self-organizing …				Blanchet, karl/F-4678-2012; Olsson, Per/AAE-9104-2019; Folke, Cal/Z-1545-2019	Olsson, Per/0000-0002-9038-4786; Hahn, Thomas/0000-0002-6649-5232; Folke, Carl/0000-0002-4050-3281			Adger WN, 2000, ECOL ECON, V35, P75, DOI 10.1016/S0921-8009(00)00169-5; ADOLFSSON K, 1985, ARASLOVSSJON FORR NU; ALEXANDERSSON H, 1986, STRANDER VID FAGELSJ; Baland J.-M., 1996, HALTING DEGRADATION; BENGTSSON SA, 1963, HAMMARSJONS HACKFAGE; Bennett EM, 2003, FRONT ECOL ENVIRON, V1, P322, DOI 10.2307/3868093; BENNULF M, 1994, MILJOOPINIONEN SVERI; Berkes F, 2003, NAVIGATING SOCIAL EC; Berkes F., 2…	65	494	508	10	162	RESILIENCE ALLIANCE	WOLFVILLE	ACADIA UNIV, BIOLOGY DEPT, WOLFVILLE, NS B0P 1X0, CANADA	1708-3087			ECOL SOC	Ecol. Soc.	DEC	2004	9	4
J	Parasuraman, S; Purohit, YS; Godshalk, VM; Beutell, NJ				Parasuraman, S; Purohit, YS; Godshalk, VM; Beutell, NJ			Work and family variables, entrepreneurial career success, and psychological well-being	JOURNAL OF VOCATIONAL BEHAVIOR			English	Article							SOCIAL SUPPORT; PATH-ANALYSIS; INTERROLE CONFLICT; JOB-SATISFACTION; 2-CAREER COUPLES; EMPLOYED MOTHERS; OUTCOMES; GENDER; MODEL; ROLES		The study examines the influence of work and family variables on the career success and psychological well-being of 111 men and women entrepreneurs. The results show that work-domain variables account for significant variation in time commitment to work, whereas family-domain variables explain substantial variation in time commitment to family. Time commitment to work and time commitment to famil…	IONA COLL, HAGAN SCH BUSINESS, NEW ROCHELLE, NY 10801 USA	Parasuraman, S (corresponding author), DREXEL UNIV, DEPT MANAGEMENT, PHILADELPHIA, PA 19104 USA.		Beutell, Nicholas/H-4099-2018	Beutell, Nicholas/0000-0001-8949-7903			ALWIN DF, 1975, AM SOCIOL REV, V40, P37, DOI 10.2307/2094445; BEDEIAN AG, 1988, J MANAGE, V14, P475, DOI 10.1177/014920638801400310; BENIN MH, 1985, J MARRIAGE FAM, V47, P975, DOI 10.2307/352341; Beutell NJ, 1980, P ANN M E AC MAN, V17, P2; BILLINGS RS, 1978, J APPL PSYCHOL, V63, P677, DOI 10.1037/0021-9010.63.6.677; BOWEN DD, 1986, ACAD MANAGE REV, V11, P393; Brenner O.C., 1991, J SMALL BUS MANA…	77	372	378	7	130	ACADEMIC PRESS INC ELSEVIER SCIENCE	SAN DIEGO	525 B ST, STE 1900, SAN DIEGO, CA 92101-4495 USA	0001-8791	1095-9084		J VOCAT BEHAV	J. Vocat. Behav.	JUN	1996	48	3
J	Parasuraman, S; Simmers, CA				Parasuraman, S; Simmers, CA			Type of employment, work-family conflict and well-being: a comparative study	JOURNAL OF ORGANIZATIONAL BEHAVIOR			English	Article							GENDER DIFFERENCES; 2-CAREER COUPLES; OUTCOMES; SUCCESS; MODEL; LIFE; JOB; ENTREPRENEURSHIP; SATISFACTION; PERFORMANCE		The study examined the impact of work and family role characteristics on work-family conflict, and indicators of psychological well being among self-employed and organizationally employed women and men. Results show that employment type and gender have independent main effects on several of the study variables. Self-employed persons enjoy greater autonomy and schedule flexibility at work, and rep…	Drexel Univ, Dept Management, Philadelphia, PA 19104 USA; St Josephs Univ, Dept Management & Informat Syst, Philadelphia, PA 19131 USA	Parasuraman, S (corresponding author), Drexel Univ, Dept Management, Philadelphia, PA 19104 USA.		Simmers, Claire/AAF-2717-2020				Baugh SG, 1997, GROUP ORGAN MANAGE, V22, P366, DOI 10.1177/1059601197223004; BEDEIAN AG, 1988, J MANAGE, V14, P475, DOI 10.1177/014920638801400310; BENIN MH, 1985, J MARRIAGE FAM, V47, P975, DOI 10.2307/352341; BOWEN DD, 1986, ACAD MANAGE REV, V11, P393; Brenner O.C., 1991, J SMALL BUS MANAGE, P62; CAPUZZI J, 1995, BUSINESS PHILADELPHI, V6, P18; Cohen Jacob, 1983, APPL MULTIPLE REGRES; COOPER AC,…	60	307	313	5	196	JOHN WILEY & SONS LTD	W SUSSEX	BAFFINS LANE CHICHESTER, W SUSSEX PO19 1UD, ENGLAND	0894-3796			J ORGAN BEHAV	J. Organ. Behav.	AUG	2001	22	5
J	Benz, M; Frey, BS				Benz, Matthias; Frey, Bruno S.			Being independent is a great thing: Subjective evaluations of self-employment and hierarchy	ECONOMICA			English	Article							PROCEDURAL UTILITY; HAPPINESS; ENTREPRENEURSHIP; UNEMPLOYMENT; RETURNS; MATTERS; WORK; JOB		One can be independent, or one can be subject to decisions made by others. This paper argues that this difference, embodied in the institutional distinction between the decision-making procedures 'market' and 'hierarchy', affects individual wellbeing beyond outcomes. Taking self-employment as an important case of independence, it is shown that the self-employed derive higher satisfaction from wor…	[Benz, Matthias; Frey, Bruno S.] Univ Zurich, CH-8006 Zurich, Switzerland	Benz, M (corresponding author), Univ Zurich, CH-8006 Zurich, Switzerland.						BENZ M, 2007, IN PRESS EC PSYCHOL; Bertrand M, 2001, AM ECON REV, V91, P67, DOI 10.1257/aer.91.2.67; Blanchflower D., 1999, WELLBEING INSECURITY; Blanchflower DG, 2001, EUR ECON REV, V45, P680, DOI 10.1016/S0014-2921(01)00137-4; Blanchflower DG, 1998, J LABOR ECON, V16, P26, DOI 10.1086/209881; Blanchflower DG, 2000, LABOUR ECON, V7, P471, DOI 10.1016/S0927-5371(00)00011-7; Clark AE, 2001, ECONOM…	43	222	225	2	56	BLACKWELL PUBLISHING	OXFORD	9600 GARSINGTON RD, OXFORD OX4 2DQ, OXON, ENGLAND	0013-0427			ECONOMICA	Economica	MAY	2008	75	298
J	Parrish, BD				Parrish, Bradley D.			Sustainability-driven entrepreneurship: Principles of organization design	JOURNAL OF BUSINESS VENTURING			English	Article						Sustainable development; Entrepreneurship; Organization design; Generative rules; Perpetual reasoning	OPPORTUNITY; EMERGENCE; COGNITION; VALIDITY; SCIENCE; FIRM		Concern about whether the social-ecological processes that provide for human wellbeing can be sustained has given rise to sustainable development as a broad social goal. As a dynamic force for change, entrepreneurship is increasingly expected to contribute to this goal. This article reports on the results of an intensive empirical study investigating the organization design expertise necessary fo…	Univ Leeds, Sustainabil Res Inst, Sch Earth & Environm, Leeds LS2 9JT, W Yorkshire, England	Parrish, BD (corresponding author), Univ Leeds, Sustainabil Res Inst, Sch Earth & Environm, Leeds LS2 9JT, W Yorkshire, England.	b.d.parrish@leeds.ac.uk					ABRECHT P, 1979, 1979 C WORLD COUNC C; Alter K., 2004, SOCIAL ENTERPRISE TY; Amit R, 2001, STRATEGIC MANAGE J, V22, P493, DOI 10.1002/smj.187; Blau P., 1963, FORMAL ORG COMP APPR; BRIEF AP, 1983, HUM RELAT, V36, P1065, DOI 10.1177/001872678303601201; BRUNSSON N, 1982, J MANAGE STUD, V19, P29, DOI 10.1111/j.1467-6486.1982.tb00058.x; CARPENTER G, 2004, INT J SUSTAINABLE BU, V11, P51; CLARKSON MBE, …	82	184	188	8	114	ELSEVIER SCIENCE BV	AMSTERDAM	PO BOX 211, 1000 AE AMSTERDAM, NETHERLANDS	0883-9026			J BUS VENTURING	J. Bus. Ventur.	SEP	2010	25	5
J	Srivastava, A; Locke, EA; Bartol, KM				Srivastava, A; Locke, EA; Bartol, KM			Money and subjective well-being: It's not the money, it's the motives	JOURNAL OF PERSONALITY AND SOCIAL PSYCHOLOGY			English	Article							AMERICAN-DREAM; MATERIALISM; SCALE; GOALS; LIFE		Past researchers have argued that the relative importance a person attaches to money is negatively related to subjective well-being (SWB). However, the past research suffers from the theoretical problem of not including the different motives for making money. With a sample of 240 business students, the authors developed a set of scales to measure motives for making money. They used a sample of 49…	Univ Maryland, Robert H Smith Sch Business, Dept Management & Org, College Pk, MD 20742 USA	Srivastava, A (corresponding author), Univ Maryland, Robert H Smith Sch Business, Dept Management & Org, Van Munching Hall, College Pk, MD 20742 USA.	asrivast@rhsmith.umd.edu					Bandura A., 1997, SELF EFFICACY EXERCI; Barling J, 1998, J APPL PSYCHOL, V83, P112, DOI 10.1037/0021-9010.83.1.112; BELK RW, 1984, ADV CONSUM RES, V11, P291; BENTLER PM, 1990, PSYCHOL BULL, V107, P238, DOI 10.1037/0033-2909.88.3.588; Bentler PM, 1995, EQS WINDOWS USERS GU; BENTLER PM, 1989, EQS STRUCTURAL PROGR; Carver CS, 1998, PSYCHOL SCI, V9, P289, DOI 10.1111/1467-9280.00057; Cohen J., 1988, …	57	177	191	2	73	AMER PSYCHOLOGICAL ASSOC	WASHINGTON	750 FIRST ST NE, WASHINGTON, DC 20002-4242 USA	0022-3514	1939-1315		J PERS SOC PSYCHOL	J. Pers. Soc. Psychol.	JUN	2001	80	6
J	FLORA, CB; FLORA, JL				FLORA, CB; FLORA, JL			ENTREPRENEURIAL SOCIAL INFRASTRUCTURE - A NECESSARY INGREDIENT	ANNALS OF THE AMERICAN ACADEMY OF POLITICAL AND SOCIAL SCIENCE			English	Article								4	Local communities are faced with increasing responsibilities to provide for their own well-being and development. With fewer resources, communities need more successful ways of uniting people and resources. Entrepreneurial social infrastructure (ESI) is a necessary ingredient for successfully linking physical resources and leadership for community development. ESI includes three elements: symboli…	KANSAS STATE UNIV AGR & APPL SCI,MANHATTAN,KS 66506	FLORA, CB (corresponding author), VIRGINIA POLYTECH INST & STATE UNIV,BLACKSBURG,VA 24061, USA.						FLORA JL, IN PRESS GRASSROOTS; FREUDENBURG WR, 1986, AM J SOCIOL, V92, P27, DOI 10.1086/228462; Hustedde R. J., 1991, RURAL COMMUNITY EC D, P111; SWANSON L, 1992, F RURAL DEV POLICY	4	169	170	0	18	SAGE PUBLICATIONS INC	THOUSAND OAKS	2455 TELLER RD, THOUSAND OAKS, CA 91320	0002-7162			ANN AM ACAD POLIT SS	Ann. Am. Acad. Polit. Soc. Sci.	SEP	1993	529
J	Karlan, D; Zinman, J				Karlan, Dean; Zinman, Jonathan			Microcredit in Theory and Practice: Using Randomized Credit Scoring for Impact Evaluation	SCIENCE			English	Article							PROGRAMS; MICROFINANCE; BANGLADESH; MATTER; POOR		Microcredit institutions spend billions of dollars fighting poverty by making small loans primarily to female entrepreneurs. Proponents argue that microcredit mitigates market failures, spurs micro-enterprise growth, and boosts borrowers' well-being. We tested these hypotheses with the use of an innovative, replicable experimental design that randomly assigned individual liability microloans (of …	[Karlan, Dean] Yale Univ, Dept Econ, New Haven, CT 06520 USA; [Karlan, Dean; Zinman, Jonathan] Innovat Poverty Act, New Haven, CT 06510 USA; [Karlan, Dean; Zinman, Jonathan] MIT, Jameel Poverty Act Lab, Cambridge, MA 02142 USA; [Zinman, Jonathan] Dartmouth Coll, Dept Econ, Hanover, NH 03755 USA	Karlan, D (corresponding author), Yale Univ, Dept Econ, New Haven, CT 06520 USA.	dean.karlan@yale.edu; jzinman@dartmouth.edu	de Groot, M/A-2025-2012	karlan, dean/0000-0003-0164-1398	Bill and Melinda Gates FoundationBill & Melinda Gates Foundation; National Science FoundationNational Science Foundation (NSF); USAIDUnited States Agency for International Development (USAID)	We thank J. Bauchet, L. Crowley, D. Duthie, M. Duthie, E. Ganir, K. Haggag, T. Harigaya, J. Soriano, M. Startz, and R. Zarsuelo for outstanding project management and research assistance; N. Hite, D. McKenzie, D. Roodman, and seminar participants at the Center for Global Development and many academic seminars and conferences for helpful comments; Bill and Melinda Gates Foundation and the National…	ARMENDARIZ B, 2007, EC MICROFINANCE, P199; ARMENDARIZ B, 2010, EC MICROFINANCE, P179; Banerjee A., 2010, MIRACLE MICROFINANCE; Cleary Matthew R., 2006, DEMOCRACY CULTURE SK; Coleman BE, 1999, J DEV ECON, V60, P105, DOI 10.1016/S0304-3878(99)00038-3; Conning Jonathan, 2005, HDB AGR EC, V3, P2857; Cull R, 2007, ECON J, V117, pF107, DOI 10.1111/j.1468-0297.2007.02017.x; Cull R, 2009, J ECON PERSPECT…	24	128	131	2	140	AMER ASSOC ADVANCEMENT SCIENCE	WASHINGTON	1200 NEW YORK AVE, NW, WASHINGTON, DC 20005 USA	0036-8075			SCIENCE	Science	40330	2011	332	6035
J	Rudolph, CW; Lavigne, KN; Zacher, H				Rudolph, Cort W.; Lavigne, Kristi N.; Zacher, Hannes			Career adaptability: A meta-analysis of relationships with measures of adaptivity, adapting, responses, and adaptation results	JOURNAL OF VOCATIONAL BEHAVIOR			English	Article						Career adaptability; CAAS; Career construction; Career success; Meta-analysis	FORM PSYCHOMETRIC PROPERTIES; FUTURE WORK SELF; UNEMPLOYED EMERGING ADULTS; ABILITIES SCALE; PROACTIVE PERSONALITY; ORGANIZATIONAL-BEHAVIOR; DAILY MANIFESTATIONS; LIFE SATISFACTION; JOB-SATISFACTION; MENTAL-ABILITY	1, 4	Career adaptability, a psychosocial resource for managing career-related tasks, transitions, and traumas, is a central construct in career construction theory and the field of vocational psychology. Based on the career construction model of adaptation, we conducted a meta-analysis to examine relationships of career adaptability with measures of adaptivity, adapting responses, adaptation results, …	[Rudolph, Cort W.; Lavigne, Kristi N.] St Louis Univ, Dept Psychol, Morrissey Hall 2827, St Louis, MO 63103 USA; [Zacher, Hannes] Univ Leipzig, Inst Psychol, D-04109 Leipzig, Germany; [Zacher, Hannes] Queensland Univ Technol, Sch Management, Brisbane, Qld 4001, Australia	Rudolph, CW (corresponding author), St Louis Univ, Morrissey Hall 2827, St Louis, MO 63103 USA.	rudolphc@slu.edu	Zacher, Hannes/X-1659-2018	Zacher, Hannes/0000-0001-6336-2947; Rudolph, Cort/0000-0002-0536-9638; Lavigne, Kristi/0000-0002-4921-5139			Alarcon GM, 2013, PERS INDIV DIFFER, V54, P821, DOI 10.1016/j.paid.2012.12.004; Ambiel R. A. M., 2016, UNPUB; Atitsogbe K.A., 2016, UNPUB; Bardagi Marucia Patta, 2015, Psicologia, V29, P35; BATEMAN TS, 1993, J ORGAN BEHAV, V14, P103, DOI 10.1002/job.4030140202; Becker GS, 1975, HUMAN CAPITAL THEORE; Bipp T., 2015, EUROPEAN J PSYCHOL A; Brown SD, 2016, ANNU REV PSYCHOL, V67, P541, DOI 10.1146/annu…	146	126	130	36	305	ACADEMIC PRESS INC ELSEVIER SCIENCE	SAN DIEGO	525 B ST, STE 1900, SAN DIEGO, CA 92101-4495 USA	0001-8791	1095-9084		J VOCAT BEHAV	J. Vocat. Behav.	FEB	2017	98
J	Baron, RA; Franklin, RJ; Hmieleski, KM				Baron, Robert A.; Franklin, Rebecca J.; Hmieleski, Keith M.			Why Entrepreneurs Often Experience Low, Not High, Levels of Stress: The Joint Effects of Selection and Psychological Capital	JOURNAL OF MANAGEMENT			English	Article						entrepreneurs; psychological capital; stress; subjective well-being; individual differences	DISPOSITIONAL POSITIVE AFFECT; VENTURE PERFORMANCE; JOB-PERFORMANCE; EMPLOYEE PERFORMANCE; AUTHENTIC LEADERSHIP; METHOD VARIANCE; MEDIATING ROLE; SELF-EFFICACY; WORK STRESS; BENEFITS		While creating and running new ventures, entrepreneurs are exposed to conditions known to generate high levels of stress (e.g., rapid change, unpredictable environments, work overload, personal responsibility for others). Thus, it has been assumed that they often experience intense stress. A markedly different possibility, however, is suggested by Attraction-Selection-Attrition (ASA) theory. This…	[Baron, Robert A.; Franklin, Rebecca J.] Oklahoma State Univ, Stillwater, OK 74078 USA; [Hmieleski, Keith M.] Texas Christian Univ, Ft Worth, TX 76129 USA	Baron, RA (corresponding author), Oklahoma State Univ, Spears Sch Business, Sch Entrepreneurship, Stillwater, OK 74078 USA.	robert.baron@okstate.edu		Hmieleski, Keith/0000-0001-5520-704X			Avey James B, 2010, Leadership & Organization Development Journal, V31, P384, DOI 10.1108/01437731011056425; Avey James B, 2008, Leadership & Organization Development Journal, V29, P110, DOI 10.1108/01437730810852470; Avey JB, 2008, J ORGAN BEHAV, V29, P705, DOI 10.1002/job.517; Avey JB, 2008, J APPL BEHAV SCI, V44, P48, DOI 10.1177/0021886307311470; Avey JB, 2011, HUM RESOUR DEV Q, V22, P127, DO…	96	113	115	20	53	SAGE PUBLICATIONS INC	THOUSAND OAKS	2455 TELLER RD, THOUSAND OAKS, CA 91320 USA	0149-2063	1557-1211		J MANAGE	J. Manag.	MAR	2016	42	3
J	Binder, M; Coad, A				Binder, Martin; Coad, Alex			Life satisfaction and self-employment: a matching approach	SMALL BUSINESS ECONOMICS			English	Article						Self-employment; Happiness; Matching estimators; Unemployment; BHPS; Necessity entrepreneurship	RESEARCH-AND-DEVELOPMENT; JOB-SATISFACTION; ENTREPRENEURSHIP; HAPPINESS; UNEMPLOYMENT; PANEL; SUBSIDIES; INCOME; IMPLEMENTATION; PREFERENCES	2	Despite lower incomes, the self-employed consistently report higher satisfaction with their jobs. But are self-employed individuals also happier, more satisfied with their lives as a whole? High job satisfaction might cause them to neglect other important domains of life, such that the fulfilling job crowds out other pleasures, leaving the individual on the whole not happier than others. Moreover…	[Binder, Martin; Coad, Alex] Max Planck Inst Econ, Evolutionary Econ Grp, D-07745 Jena, Germany; [Coad, Alex] Univ Sussex, SPRU, Brighton BN1 9QE, E Sussex, England	Binder, M (corresponding author), Max Planck Inst Econ, Evolutionary Econ Grp, Kahlaische Str 10, D-07745 Jena, Germany.	binder@econ.mpg.de	Coad, alexander/H-8938-2012; Binder, Martin/AAF-6448-2020	Coad, alexander/0000-0002-5706-0528; Binder, Martin/0000-0002-5053-3804	Economic and Social Research CouncilEconomic & Social Research Council (ESRC) [ES/H008705/1, ES/J008427/1] Funding Source: Researchfish		Abadie A, 2004, STATA J, V4, P290, DOI 10.1177/1536867X0400400307; Almus M, 2003, J BUS ECON STAT, V21, P226, DOI 10.1198/073500103288618918; Andersson P., 2008, J SOCIO-ECON, V37, P213, DOI DOI 10.1016/J.S0CEC.2007.03.003; Becker SO, 2002, STATA J, V2, P358, DOI 10.1177/1536867X0200200403; Benz M, 2008, ECONOMICA, V75, P362, DOI 10.1111/j.1468-0335.2007.00594.x; Benz M, 2008, J ECON BEHAV ORGAN,…	83	110	111	10	102	SPRINGER	DORDRECHT	VAN GODEWIJCKSTRAAT 30, 3311 GZ DORDRECHT, NETHERLANDS	0921-898X	1573-0913		SMALL BUS ECON	Small Bus. Econ. Group	MAY	2013	40	4
J	GARTNER, WB; SHANE, SA				GARTNER, WB; SHANE, SA			MEASURING ENTREPRENEURSHIP OVER TIME	JOURNAL OF BUSINESS VENTURING			English	Article; Proceedings Paper	4th Global Entrepreneurship Research Conference	MAR, 1994	INSEAD, FONTAINEBLEAU, FRANCE		INSEAD		SELF-EMPLOYMENT		This article is a review of three measurement issues that impact the study of entrepreneurship over time: (1) level of analysis differences between firms and individuals, (2) differences between rate and stock measures, and (3) the effects of choosing particular time frames on subsequent analytical results. Based on theory that views entrepreneurship as depending on ownership rights (Hawley 1907)…	SAN FRANCISCO STATE UNIV, SAN FRANCISCO, CA 94132 USA; GEORGIA INST TECHNOL, ATLANTA, GA 30332 USA							ALDRICH H, 1989, J BUS VENTURING, V4, P367, DOI 10.1016/0883-9026(89)90008-6; ALDRICH H, 1990, ENTREP THEORY PRACT, V14, P7; ALDRICH HE, 1993, ADV ENTREPRENEURSHIP, V1, P145; Aldrich Howard, 1988, ECOLOGICAL MODELS OR, P111; Amburgey Terry L., 1988, ECOLOGICAL MODELS OR, P153; ARMINGTON C, 1989, DIFFERENCES BUSINESS; Armington C., 1982, BROOKINGS REV, P14, DOI DOI 10.2307/20079774; BARNETT WP, 19…	64	109	113	3	67	ELSEVIER	AMSTERDAM	RADARWEG 29, 1043 NX AMSTERDAM, NETHERLANDS	0883-9026	1873-2003		J BUS VENTURING	J. Bus. Ventur.	JUL	1995	10	4
J	Blake, MK; Hanson, S				Blake, MK; Hanson, S			Rethinking innovation: context and gender	ENVIRONMENT AND PLANNING A			English	Article							LOCAL ECONOMIC-DEVELOPMENT; KNOWLEDGE; REGION; FIRMS; ENTREPRENEURSHIP; COMPETITIVENESS; PERFORMANCE; INDUSTRIAL; SCOTLAND; PLACE		Geographers have a keen interest in innovation because of its connection to regional economic advantage. We argue that, to date, understandings of innovation are predominantly technological and product driven and defined in universal terms such that the nature of innovation is stripped of its contextual influence and is overly masculinist. Through combined analysis of interview material from two …	Univ Sheffield, Dept Geog, Sheffield S10 2TN, S Yorkshire, England; Clark Univ, Sch Geog, Worcester, MA 01610 USA	Blake, MK (corresponding author), Univ Sheffield, Dept Geog, Winter St, Sheffield S10 2TN, S Yorkshire, England.	M.Blake@Sheffield.ac.uk; Shanson@clarku.edu	Blake, Megan K/C-2905-2012	Blake, Megan K/0000-0002-8487-8202			Acs Z., 1999, ENTREPRENEURSHIP SMA, P3; ALDRICH HE, 1990, ANNU REV SOCIOL, V16, P111, DOI 10.1146/annurev.so.16.080190.000551; Amin A, 1999, INT J URBAN REGIONAL, V23, P365, DOI 10.1111/1468-2427.00201; Amin A, 1999, CAMBRIDGE J ECON, V23, P121, DOI 10.1093/cje/23.2.121; Amin A., 1997, GEOGRAPHIES EC, P147, DOI [DOI 10.1080/14747730500202230, 10.1080/14747730500202230]; AMIN A, 1994, GLOBALIZATIO…	69	101	103	1	26	PION LTD	LONDON	207 BRONDESBURY PARK, LONDON NW2 5JN, ENGLAND	0308-518X			ENVIRON PLANN A	Environ. Plan. A	APR	2005	37	4
J	Stephan, U; Roesler, U				Stephan, Ute; Roesler, Ulrike			Health of entrepreneurs versus employees in a national representative sample	JOURNAL OF OCCUPATIONAL AND ORGANIZATIONAL PSYCHOLOGY			English	Article							JOB CHARACTERISTICS; PSYCHOSOCIAL FACTORS; WORKING POPULATION; SELF-EMPLOYMENT; BUSINESS OWNERS; MENTAL-HEALTH; STRESS; STRAIN; SATISFACTION; INTERVIEW		Prior research has found entrepreneurs to experience significantly higher job control and job demands compared with employees. This suggests that entrepreneurs have so-called active jobs and thus may benefit from positive health consequences. The present research compared entrepreneurs' health with employees' health in a national representative sample with regard to the International Statistical …	[Stephan, Ute] Katholieke Univ Leuven, Fac Business & Econ, B-3000 Louvain, Belgium; [Stephan, Ute; Roesler, Ulrike] Univ Marburg, D-35032 Marburg, Germany	Stephan, U (corresponding author), Katholieke Univ Leuven, Fac Business & Econ, Naamsestraat 69, B-3000 Louvain, Belgium.	ute.stephan@econ.kuleuven.be		Stephan, Ute/0000-0003-4514-6057			Amick BC, 2002, PSYCHOSOM MED, V64, DOI 10.1097/00006842-200205000-00002; Belkic KL, 2004, SCAND J WORK ENV HEA, V30, P85, DOI 10.5271/sjweh.769; BELLACH BM, 1998, GESUNDHEITSWESEN, V60, P59; BIRLEY S, 1994, J BUS VENTURING, V9, P7, DOI 10.1016/0883-9026(94)90024-8; BOYD DP, 1984, J OCCUP PSYCHOL, V57, P137, DOI 10.1111/j.2044-8325.1984.tb00155.x; BOYD DP, 1982, AM J SMALL BUSINESS, V6, P3; Bradl…	89	95	95	2	44	WILEY	HOBOKEN	111 RIVER ST, HOBOKEN 07030-5774, NJ USA	0963-1798	2044-8325		J OCCUP ORGAN PSYCH	J. Occup. Organ. Psychol.	SEP	2010	83	3
J	Roche, M; Haar, JM; Luthans, F				Roche, Maree; Haar, Jarrod M.; Luthans, Fred			The Role of Mindfulness and Psychological Capital on the Well-Being of Leaders	JOURNAL OF OCCUPATIONAL HEALTH PSYCHOLOGY			English	Article						leaders' well-being; psychological well-being; mindfulness; mindfulness of leaders; psychological capital of leaders	ORGANIZATIONAL RESEARCH; EMOTIONAL EXHAUSTION; JOB-SATISFACTION; WORK; IMPACT; STRESS; PERFORMANCE; ATTITUDES; BENEFITS; MOOD	4	In today's highly competitive and extremely complex global economy, organizational leaders at all levels are facing unprecedented challenges. Yet, some seem to be handling the pressure better than others. Utilizing 4 samples of CEOs/presidents/top (n = 205), middle (n = 183), and junior (n = 202) managers, as well as 107 entrepreneurs, using Structural Equation Modeling we tested the direct effec…	[Roche, Maree] Univ Waikato, Sch Psychol, Hamilton 3210, New Zealand; [Haar, Jarrod M.] Massey Univ, Coll Business, Sch Management, Albany, New Zealand; [Luthans, Fred] Univ Nebraska, Dept Management, Lincoln, NE 68583 USA	Roche, M (corresponding author), Univ Waikato, Sch Psychol, Hamilton 3210, New Zealand.	mroche@waikato.ac.nz	Luthans, Fred/AAX-4675-2020; Roche, Maree/Q-7790-2016	Roche, Maree/0000-0003-2711-4895			Allen T. D., 2011, J VOCAT BEHAV, V98, P310; Andersson LM, 1996, HUM RELAT, V49, P1395, DOI 10.1177/001872679604901102; Andrea H, 2009, DEPRESS ANXIETY, V26, P1040, DOI 10.1002/da.20516; Avey JB, 2008, J APPL BEHAV SCI, V44, P48, DOI 10.1177/0021886307311470; Avey JB, 2011, HUM RESOUR DEV Q, V22, P127, DOI 10.1002/hrdq.20070; Avey JB, 2011, LEADERSHIP QUART, V22, P282, DOI 10.1016/j.leaqua.2011.0…	95	91	94	13	183	AMER PSYCHOLOGICAL ASSOC	WASHINGTON	750 FIRST ST NE, WASHINGTON, DC 20002-4242 USA	1076-8998	1939-1307		J OCCUP HEALTH PSYCH	J. Occup. Health Psychol.	OCT	2014	19	4
J	Lelkes, O				Lelkes, O			Tasting freedom: Happiness, religion and economic transition	JOURNAL OF ECONOMIC BEHAVIOR & ORGANIZATION			English	Article						happiness; economic transition; religion; entrepreneurs			Economic transition lowered happiness on average, but did not affect everyone equally. This paper uses Hungarian survey data to study the impact of religion and economic transition on happiness. Religious involvement contributes positively to individuals' self-reported well-being. Controlling for personal characteristics of the respondents, money is a less important source of happiness for the re…	European Ctr Social Welfare Policy & Res, A-1090 Vienna, Austria	Lelkes, O (corresponding author), European Ctr Social Welfare Policy & Res, Berggasse 17, A-1090 Vienna, Austria.	lelkes@euro.centre.org			Economic and Social Research CouncilEconomic & Social Research Council (ESRC) [RES-558-28-5001] Funding Source: Researchfish		Alesina A, 2004, J PUBLIC ECON, V88, P2009, DOI 10.1016/j.jpubeco.2003.07.006; ANDORKA R, 1999, SOC TRANSFORMED HUNG, P147; ANDORKA R, 1992, STATISZITKAI SZEMLE, V70, P301; Argyle M., 1999, WELL BEING FDN HEDON, P353, DOI DOI 10.7758/9781610443258.22; Blanchflower DG, 2001, EUR ECON REV, V45, P680, DOI 10.1016/S0014-2921(01)00137-4; Blanchflower DG, 1998, J LABOR ECON, V16, P26, DOI 10.1086/20988…	45	90	92	0	30	ELSEVIER	AMSTERDAM	RADARWEG 29, 1043 NX AMSTERDAM, NETHERLANDS	0167-2681	1879-1751		J ECON BEHAV ORGAN	J. Econ. Behav. Organ.	FEB	2006	59	2
J	Kroeger, A; Weber, C				Kroeger, Arne; Weber, Christiana			DEVELOPING A CONCEPTUAL FRAMEWORK FOR COMPARING SOCIAL VALUE CREATION	ACADEMY OF MANAGEMENT REVIEW			English	Article							QUALITY-OF-LIFE; ORGANIZATIONAL-EFFECTIVENESS; SUBJECTIVE INDICATORS; ENTREPRENEURSHIP; SATISFACTION; PERFORMANCE; RESPONSIBILITY; MODEL; CSR; OPPORTUNITIES		The soaring popularity of business practices in the social sector has elicited numerous calls from academics and practitioners to adopt appropriate methodologies to quantify and compare social value creation. Contributing scholars consider it a great if not impossible challenge to compare social value creation of different, unrelated heterogonous interventions. We help bridge this research gap by…	[Kroeger, Arne; Weber, Christiana] Leibniz Univ Hannover, Hannover, Germany	Kroeger, A (corresponding author), Leibniz Univ Hannover, Hannover, Germany.	arne.kroeger@ufo.uni-hannover.de; christiana.weber@ufo.uni-hannover.de					Abdallah S., 2007, ECOLOGICAL ECONOMICS, V65, P35; Anand P, 2009, J HUM DEV CAPABIL, V10, P125, DOI 10.1080/14649880802675366; ANDREWS FM, 1974, SOC INDIC RES, V1, P1, DOI 10.1007/BF00286419; [Anonymous], 2008, THE DAILY BEAST; Austin J, 2006, ENTREP THEORY PRACT, V30, P1, DOI 10.1111/j.1540-6520.2006.00107.x; Bagnoli L, 2011, NONPROF VOLUNT SEC Q, V40, P149, DOI 10.1177/0899764009351111; Bamberg…	169	87	87	9	170	ACAD MANAGEMENT	BRIARCLIFF MANOR	PACE UNIV, PO BOX 3020, 235 ELM RD, BRIARCLIFF MANOR, NY 10510-8020 USA	0363-7425	1930-3807		ACAD MANAGE REV	Acad. Manage. Rev.	OCT	2014	39	4
J	Carter, S				Carter, Sara			The Rewards of Entrepreneurship: Exploring the Incomes, Wealth, and Economic Well-Being of Entrepreneurial Households	ENTREPRENEURSHIP THEORY AND PRACTICE			English	Article							SELF-EMPLOYMENT; FAMILY; DYNAMICS; RETURNS; TIME; PAY		The financial rewards and consequences of entrepreneurship for the individual are unknown. Prior studies have focused on self-employment income estimates and have highlighted the low median earnings that may be anticipated. The apparent financial irrationality of entrepreneurship is typically explained in terms of nonpecuniary compensating factors, such as autonomy and satisfaction. However, the …	[Carter, Sara] Univ Strathclyde, Sch Business, Hunter Ctr Entrepreneurship, Glasgow G1 1XQ, Lanark, Scotland	Carter, S (corresponding author), Nordland Res Inst, Bodo, Norway.	sara.carter@strath.ac.uk		Carter, Sara/0000-0001-5812-4354			Aldrich HE, 2003, J BUS VENTURING, V18, P573, DOI 10.1016/S0883-9026(03)00011-9; ALLINSON G, 2009, CONCEPTUALISING SELF; ASTEBRO T, 2007, 0705 FLOR INT U DEP; Avery RB, 1998, J BANK FINANC, V22, P1019, DOI 10.1016/S0378-4266(98)00016-8; Baines S, 1998, WORK EMPLOY SOC, V12, P579, DOI 10.1177/0950017098124001; Blanchflower D. G., 2004, W10286 NBER; Blanchflower DG, 2007, FOUND TRENDS ENTREP, V3, P…	75	81	82	7	54	SAGE PUBLICATIONS INC	THOUSAND OAKS	2455 TELLER RD, THOUSAND OAKS, CA 91320 USA	1042-2587	1540-6520		ENTREP THEORY PRACT	Entrep. Theory Pract.	JAN	2011	35	1
J	Zahra, SA; Newey, LR; Li, Y				Zahra, Shaker A.; Newey, Lance R.; Li, Yong			On the Frontiers: The Implications of Social Entrepreneurship for International Entrepreneurship	ENTREPRENEURSHIP THEORY AND PRACTICE			English	Article							EMERGING MULTINATIONALS; ECONOMIES; RESPONSIBILITY; INTERSECTION; DISCOVERY; MARKETS; FUTURE; FIELD; NEED	4, 10	We explore how social entrepreneurship (SE) research extends the field of international entrepreneurship (IE) to affect global sustainable well-being. Well-being is a multidimensional concept that includes financial, social, and environmental wealth creation. Much of IE research thus far has been based primarily on assumptions of economic opportunity recognition, evaluation, and exploitation. We …	[Zahra, Shaker A.] Univ Minnesota, Carlson Sch Management, Dept Strateg Management & Org, Minneapolis, MN 55455 USA; [Zahra, Shaker A.] Univ Minnesota, Carlson Sch Management, Gary S Holmes Entrepreneurship Ctr, Minneapolis, MN 55455 USA; [Newey, Lance R.] Univ Queensland, UQ Business Sch, Brisbane, Qld 4072, Australia; [Li, Yong] SUNY Buffalo, Jacobs Management Ctr 326, Sch Management, Amherst, …	Li, Y (corresponding author), SUNY Buffalo, Jacobs Management Ctr 326, Sch Management, Amherst, NY 14260 USA.	zahra004@umn.edu; l.newey@business.uq.edu.au; YL67@buffalo.edu					Alvarez SA, 2013, ORGAN SCI, V24, P301, DOI 10.1287/orsc.1110.0727; Alvarez SA, 2010, ACAD MANAG ANN, V4, P557, DOI 10.1080/19416520.2010.495521; Alvarez SA, 2007, STRATEG ENTREP J, V1, P11, DOI 10.1002/sej.4; [Anonymous], 2012, GLOB VENT CAP GLOB V; Austin J, 2006, ENTREP THEORY PRACT, V30, P1, DOI 10.1111/j.1540-6520.2006.00107.x; Baron DP, 2007, J ECON MANAGE STRAT, V16, P683, DOI 10.1111/j.15…	76	79	81	4	151	SAGE PUBLICATIONS INC	THOUSAND OAKS	2455 TELLER RD, THOUSAND OAKS, CA 91320 USA	1042-2587	1540-6520		ENTREP THEORY PRACT	Entrep. Theory Pract.	JAN	2014	38	1
J	Moore, P; Robinson, A				Moore, Phoebe; Robinson, Andrew			The quantified self: What counts in the neoliberal workplace	NEW MEDIA & SOCIETY			English	Article						Big data; control society; labour process; precarious labour; new materialism; quantified self; self-tracking; surveillance; Taylorism; wearable technologies			Implementation of quantified self technologies in workplaces relies on the ontological premise of Cartesian dualism with mind dominant over body. Contributing to debates in new materialism, we demonstrate that workers are now being asked to measure our own productivity and health and well-being in art-houses and warehouses alike in both the global north and south. Workers experience intensified p…	[Moore, Phoebe] Middlesex Univ London, Dept Law & Polit, London, England	Moore, P (corresponding author), Middlesex Univ London, Dept Law & Polit, Sch Law, London NW4 4BT, England.	p.moore@mdx.ac.uk					Adorno T, 2005, CULTURE IND SELECTED; Agamben G, 1998, HOMOSACER SOVEREIGN; Baudrillard J, 1987, SHADOW SILENT MAJORI; Baudrillard J., 1981, SIMULACRA SIMULATION; BERGSON H., 1997, ESSAI DONNEEIMMEDI; Bergson Henri, 2001, TIME FREE WILL ESSAY; Berlant Lauren., 2011, CRUEL OPTIMISM; Bourdieu A, 1998, ACTS RESISTANCE TYRA; Braidotti R, 2005, RHIZOMES; Braidotti Rosi., 2006, TRANSPOSITIONS; Braverma…	106	73	73	5	40	SAGE PUBLICATIONS LTD	LONDON	1 OLIVERS YARD, 55 CITY ROAD, LONDON EC1Y 1SP, ENGLAND	1461-4448	1461-7315		NEW MEDIA SOC	New Media Soc.	DEC	2016	18	11
J	Uy, MA; Foo, MD; Song, ZL				Uy, Marilyn A.; Foo, Maw-Der; Song, Zhaoli			Joint effects of prior start-up experience and coping strategies on entrepreneurs' psychological well-being	JOURNAL OF BUSINESS VENTURING			English	Article						Entrepreneur; Coping; Psychological well-being; Prior start-up experience	GENERAL HEALTH QUESTIONNAIRE; DECISION-MAKING DIFFERENCES; SOCIAL SUPPORT; SELF-EFFICACY; MENTAL-HEALTH; OCCUPATIONAL STRESS; PREDICTIVE LOGICS; NEGATIVE EMOTIONS; JOB-PERFORMANCE; FOUNDERS HUMAN	6	Drawing on theories from the coping and entrepreneurship literatures, we investigated the relationship between the entrepreneurs' active and avoidance coping on psychological wellbeing (PWB) and the moderating role of prior start-up experience on this relationship. Data from 156 entrepreneurs indicate that the use of avoidance coping positively predicted immediate PWB for entrepreneurs with more …	[Uy, Marilyn A.] Nanyang Technol Univ, Nanyang Business Sch, Singapore 639798, Singapore; [Foo, Maw-Der] Univ Colorado, Leeds Sch Business, Boulder, CO 80309 USA; [Song, Zhaoli] Natl Univ Singapore, NUS Business Sch, Singapore 117592, Singapore	Uy, MA (corresponding author), Nanyang Technol Univ, Nanyang Business Sch, S3-B2B-69,50 Nanyang Ave, Singapore 639798, Singapore.	muy@ntu.edu.sg; foom@colorado.edu; songzl@nus.edu.sg	Song, Zhaoli/H-6734-2013; Foo, Maw Der/B-3255-2009	Foo, Maw Der/0000-0002-4887-081X; Uy, Marilyn/0000-0003-4265-4021			Aiken L. S., 1991, MULTIPLE REGRESSION; Aldrich HE, 2001, ENTREP THEORY PRACT, V25, P41, DOI DOI 10.1177/104225870102500404; ALDWIN CM, 1987, J PERS SOC PSYCHOL, V53, P337, DOI 10.1037/0022-3514.53.2.337; ARMSTRONG JS, 1977, J MARKETING RES, V14, P396, DOI 10.2307/3150783; BANDURA A, 1977, PSYCHOL REV, V84, P191, DOI 10.1037/0033-295X.84.2.191; BANKS MH, 1980, J OCCUP PSYCHOL, V53, P187, DOI 10.1…	151	73	74	5	133	ELSEVIER	AMSTERDAM	RADARWEG 29, 1043 NX AMSTERDAM, NETHERLANDS	0883-9026	1873-2003		J BUS VENTURING	J. Bus. Ventur.	SEP	2013	28	5
J	Williams, TA; Shepherd, DA				Williams, Trenton A.; Shepherd, Dean A.			BUILDING RESILIENCE OR PROVIDING SUSTENANCE: DIFFERENT PATHS OF EMERGENT VENTURES IN THE AFTERMATH OF THE HAITI EARTHQUAKE	ACADEMY OF MANAGEMENT JOURNAL			English	Article							DISASTER; ENTREPRENEURSHIP; COMMUNITY; IDENTITY; FIRMS; RISK; ORGANIZATIONS; COMPASSIONATE; LEGITIMATE; ACADEMIA	5	Disaster events threaten the lives, economies, and wellbeing of those they impact. Understanding the role of emergent organizations in responding to suffering and building resilience is an important component of the grand challenge of how to effectively respond to disasters. In this inductive case study we explore venture creation initiated by locals in response to suffering following the 2010 Ha…	[Williams, Trenton A.] Syracuse Univ, Whitman Sch Management, Syracuse, NY 13244 USA; [Shepherd, Dean A.] Indiana Univ, Kelley Sch Business, Strateg Entrepreneurship, Bloomington, IN 47405 USA	Williams, TA (corresponding author), Syracuse Univ, Whitman Sch Management, Syracuse, NY 13244 USA.	tawil101@syr.edu; shepherd@indiana.edu			Indiana University's Center for International Business Education and Research (CIBER)	We would like to thank Gerben S. van der Vegt and three anonymous reviewers for their support and developmental comments. We would also like to thank Watson Claire-Jeune, Thomas Davies, Benjamin Warnick, Ali Ferguson, and Indiana University's Creole Institute for their valuable assistance. We also thank Indiana University's Center for International Business Education and Research (CIBER) for prov…	Aldrich DP, 2012, BUILDING RESILIENCE; Anderson A. I., 2005, IEEE ENG MANAGEMENT, V16, P114; Baker T, 2003, RES POLICY, V32, P255, DOI 10.1016/S0048-7333(02)00099-9; Baker T, 2005, ADMIN SCI QUART, V50, P329, DOI 10.2189/asqu.2005.50.3.329; Berthod O, 2015, J CONTING CRISIS MAN, V23, P24, DOI 10.1111/1468-5973.12069; Bigley GA, 2001, ACAD MANAGE J, V44, P1281, DOI 10.2307/3069401; Bonnett G. D., …	92	71	72	13	119	ACAD MANAGEMENT	BRIARCLIFF MANOR	PACE UNIV, PO BOX 3020, 235 ELM RD, BRIARCLIFF MANOR, NY 10510-8020 USA	0001-4273	1948-0989		ACAD MANAGE J	Acad. Manage. J.	DEC	2016	59	6
J	Dawson, P; Daniel, L				Dawson, Patrick; Daniel, Lisa			Understanding social innovation: a provisional framework	INTERNATIONAL JOURNAL OF TECHNOLOGY MANAGEMENT			English	Article						social innovation; sustainability; change; social capital; corporate social responsibility; CSR; social entrepreneurship; Socratic dialogue			This article examines what we understand by the concept of social innovation. Historically, the emphasis has been on how to translate innovations in science and technology into commercial applications. Typically, company survival is explained in terms of an 'innovation imperative' in the pursuit of profits and competitive advantage. In contrast, social innovations are triggered by an interest in …	[Dawson, Patrick] Univ Wollongong, Sch Management & Mkt, Wollongong, NSW 2522, Australia; [Dawson, Patrick] Univ Aberdeen, Sch Business, Aberdeen AB24 3QY, Scotland; [Daniel, Lisa] Univ Adelaide, Sch Commerce, Adelaide, SA 5005, Australia	Dawson, P (corresponding author), Univ Wollongong, Sch Management & Mkt, Wollongong, NSW 2522, Australia.	patrickd@uow.edu.au; lisa.daniel@adelaide.edu.au	Dawson, Patrick/AAJ-7977-2020; Dawson, Patrick M/J-7753-2017	Dawson, Patrick/0000-0002-3175-1275; Dawson, Patrick M/0000-0002-3175-1275			ABERNATHY WJ, 1978, TECHNOLOGY REV JUN, P40; Austin J, 2006, ENTREP THEORY PRACT, V30, P1, DOI 10.1111/j.1540-6520.2006.00107.x; BESSANT J, 2007, INNOVATION ENTERPERN; Bornstein D., 2003, CHANGE WORLD SOCIAL; Burns T., 1961, MANAGEMENT INNOVATIO; CLEGG S, 1980, ORG CLASS CONTROL; Cooley M., 1980, ARCHITECT BEE HUMAN; Dunphy D.C., 2007, ORG CHANGE CORPORATE; Freeman C., 1997, EC IND INNOVATION; GR…	32	66	67	12	182	INDERSCIENCE ENTERPRISES LTD	GENEVA	WORLD TRADE CENTER BLDG, 29 ROUTE DE PRE-BOIS, CASE POSTALE 896, CH-1215 GENEVA, SWITZERLAND	0267-5730			INT J TECHNOL MANAGE	Int. J. Technol. Manage.		2010	51	1
J	CHAY, YW				CHAY, YW			SOCIAL SUPPORT, INDIVIDUAL-DIFFERENCES AND WELL-BEING - A STUDY OF SMALL BUSINESS ENTREPRENEURS AND EMPLOYEES	JOURNAL OF OCCUPATIONAL AND ORGANIZATIONAL PSYCHOLOGY			English	Article							PERCEIVED CONTROL; MENTAL STRAIN; STRESS; JOB; WORK; HEALTH; QUESTIONNAIRE; EXTRAVERSION; NEUROTICISM; MODERATORS		This study examined the relationships between social support and personality factors as moderators of stress arising from demands in the workplace. Data on personal, demographic and job characteristics as well as measures of individual traits, social support and psychological well-being were collected from a sample of 117 entrepreneurs and employees. The results showed significant differences in …		CHAY, YW (corresponding author), NATL UNIV SINGAPORE,DEPT ORGANIZAT BEHAV,10 KENT RIDGE CRESCENT,SINGAPORE 0511,SINGAPORE.						AHMED SU, 1985, PERS INDIV DIFFER, V6, P781, DOI 10.1016/0191-8869(85)90092-3; ARGYLE M, 1962, BRIT J SOC CLIN PSYC, V1, P107; BANKS MH, 1980, J OCCUP PSYCHOL, V53, P187, DOI 10.1111/j.2044-8325.1980.tb00024.x; BORUCKI Z, 1985, POLISH PSYCHOL B, V16, P155; CALDWELL RA, 1988, J SOC CLIN PSYCHOL, V6, P140, DOI 10.1521/jscp.1988.6.1.140; CAPLAN RD, 1975, DHEW NIOSH75160 PUBL; CLEARY PD, 1982, J HEAL…	60	66	66	1	47	BRITISH PSYCHOLOGICAL SOC	LEICESTER	ST ANDREWS HOUSE, 48 PRINCESS RD EAST, LEICESTER, LEICS, ENGLAND LE1 7DR	0963-1798			J OCCUP ORGAN PSYCH	J. Occup. Organ. Psychol.	DEC	1993	66		4
J	ten Berge, HFM; van Ittersum, MK; Rossing, WAH; van de Ven, GWJ; Schans, J; van de Sanden, PACM				ten Berge, HFM; van Ittersum, MK; Rossing, WAH; van de Ven, GWJ; Schans, J; van de Sanden, PACM			Farming options for The Netherlands explored by multi-objective modelling	EUROPEAN JOURNAL OF AGRONOMY			English	Article; Proceedings Paper	5th Congress of the European-Society-for-Agronomy	JUN 28-JUL 02, 1998	NITRA, SLOVAKIA	European Soc Agron		farming systems; exploration; modelling; intensive farming; multiple goal; optimisation	EUROPEAN-COMMUNITY; SYSTEMS; INPUT	3	Intensive agriculture in The Netherlands has a price in the form of environmental degradation and the diminution of nature and landscape values. A reorientation of farming is needed to find a new balance between economic goals and rural employment, and care for clean water and air, animal well-being, safe food, and the preservation of soil, landscape and biodiversity. The search for farm systems …	Plant Res Int, NL-6700 AA Wageningen, Netherlands; Wageningen Univ Agr, Dept Theoret Prod Ecol, NL-6700 AK Wageningen, Netherlands; CML, Ctr Environm Sci, NL-2300 RA Leiden, Netherlands; Plant Protect Serv, NL-6700 HC Wageningen, Netherlands; Wageningen Univ, Grp Plant Prod Syst, NL-6700 AK Wageningen, Netherlands; Wageningen Univ, Grp Biol Farming Syst, NL-6709 PG Wageningen, Netherlands	ten Berge, HFM (corresponding author), Plant Res Int, POB 16, NL-6700 AA Wageningen, Netherlands.	h.f.m.tenberge@ab.wag-ur.nl	van Ittersum, Martin/J-8024-2014	van Ittersum, Martin/0000-0001-8611-6781			AARTS HFM, 1990, 131 CABO; CASTRO E, 1998, POLITICAS USO SOSTEN, P53; DEKONING GHJ, 1995, AGR SYST, V48, P485, DOI 10.1016/0308-521X(94)00022-D; DEWIT CT, 1988, AGR SYST, V26, P211, DOI 10.1016/0308-521X(88)90012-1; French S., 1983, MULTIOBJECTIVE DECIS; HABEKOTTE B, 1994, 34 CABOTT; HABEKOTTE B, 1996, 64 ABDLO; HARWOOD RR, 1990, SUSTAINABLE AGRICULTURAL SYSTEMS, P3; HENRICHSMEYER W, 1998, SCHRIF…	32	65	67	0	36	ELSEVIER	AMSTERDAM	RADARWEG 29, 1043 NX AMSTERDAM, NETHERLANDS	1161-0301	1873-7331		EUR J AGRON	Eur. J. Agron.	AUG	2000	13	43892
J	Kuriyan, R; Ray, I; Toyama, K				Kuriyan, Renee; Ray, Isha; Toyama, Kentaro			Information and communication technologies for development: The bottom of the pyramid model in practice	INFORMATION SOCIETY			English	Article						India; information technology; Kerala; kiosks; rural development	KERALA MODEL; INDIA; LESSONS; STATE; GLOBALIZATION; POOR		The currently influential model for information and communication technologies for development (ICT4D) is based on increasing the well-being of the poor through market-based solutions, and by using low-cost but advanced technologies. Using ethnographic methods, we chart out the contradictions that could arise when such a development-through-entrepreneurship model is implemented. We examine the Ak…	[Kuriyan, Renee; Ray, Isha] Univ Calif Berkeley, Energy & Resources Grp, Berkeley, CA 94720 USA; [Toyama, Kentaro] Microsoft Res Lab India Private Ltd, Bangalore, Karnataka, India	Kuriyan, R (corresponding author), Univ Calif Berkeley, Energy & Resources Grp, 310 Barrows Hall, Berkeley, CA 94720 USA.	rkuriyan@berkeley.edu		Toyama, Kentaro/0000-0002-9128-2255			Abraham R., 2006, INT C INF COMM TECHN; Arora A, 2001, RES POLICY, V30, P1267, DOI 10.1016/S0048-7333(00)00148-7; Arunachalam S, 2002, J INF SCI, V28, P513, DOI 10.1177/016555150202800607; Bates R. H., 1981, MARKETS STATES TROPI; Blattman C, 2003, INFORM SOC, V19, P349, DOI [10.1080/714044683, 10.1080/01972240390241475]; Brewer E, 2005, COMPUTER, V38, P25, DOI 10.1109/MC.2005.204; Burawoy M, 1998…	43	64	64	1	44	TAYLOR & FRANCIS INC	PHILADELPHIA	325 CHESTNUT ST, SUITE 800, PHILADELPHIA, PA 19106 USA	0197-2243			INFORM SOC	Inf. Soc.		2008	24	2
J	Crawshaw, P				Crawshaw, Paul			Governing the healthy male citizen: Men, masculinity and popular health in Men's Health magazine	SOCIAL SCIENCE & MEDICINE			English	Article						men's health; masculinity; media; magazines; governance; UK; neo-liberalism	POWER; MEDIA; LIFE; DISCOURSE		Recent commentators have noted the potential of newer neo-liberal discourses of health care to position responsibility for the management of well-being with the individual. Often promoted through the inculcation of risk avoidance and management, such discourses are played out in myriad settings, including the popular media. Magazines are one such media site in which diverse exhortations for the a…	Univ Teesside, Sch Hlth & Social Care, Middlesbrough TS1 3BA, Cleveland, England	Crawshaw, P (corresponding author), Univ Teesside, Sch Hlth & Social Care, Borough Rd, Middlesbrough TS1 3BA, Cleveland, England.	p.crawshaw@tees.ac.uk		Crawshaw, Paul/0000-0002-9299-4895			ALTHUSSER L, 1977, LENIN PHILOS OTHER E; ARMSTRONG D, 1995, SOCIOL HEALTH ILL, V17, P393, DOI 10.1111/1467-9566.ep10933329; Armstrong David, 2002, NEW HIST IDENTITY SO; Barry A., 1996, FOUCAULT POLITICAL R; Beck U., 2002, INDIVIDUALISATION; Beck U., 1992, RISK SOC MODERNITY; Beetham Margaret, 1996, MAGAZINE HER OWN DOM; Benwell B, 2004, MEN MASC, V7, P3, DOI DOI 10.1177/1097184X03257438; Boni F, …	68	62	62	0	15	PERGAMON-ELSEVIER SCIENCE LTD	OXFORD	THE BOULEVARD, LANGFORD LANE, KIDLINGTON, OXFORD OX5 1GB, ENGLAND	0277-9536			SOC SCI MED	Soc. Sci. Med.	OCT	2007	65	8
J	Dew, N; Sarasvathy, SD				Dew, Nicholas; Sarasvathy, Saras D.			Innovations, stakeholders & entrepreneurship	JOURNAL OF BUSINESS ETHICS			English	Article						effectuation; entrepreneurship; innovation; stakeholder	ETHICS; UNCERTAINTY; BEHAVIOR; MARKET		In modern societies entrepreneurship and innovation are widely seen as key sources of economic growth and welfare increases. Yet entrepreneurial innovation has also meant losses and hardships for some members of society: it is destructive of some stakeholders' wellbeing even as it creates new wellbeing among other stakeholders. Both the positive benefits and negative externalities of innovation a…	USN, Postgrad Sch, Monterey, CA 93943 USA; Univ Virginia, Darden Grad Sch Business Adm, Charlottesville, VA 22906 USA	Dew, N (corresponding author), USN, Postgrad Sch, 1 Univ Circle,1 Dyer Pl, Monterey, CA 93943 USA.	ndew@nps.edu; sarasvathys@darden.virginia.edu					ABRAMS JJ, 2002, TRANSACTIONS CHARLS, V4, P543; ADLER JH, 2003, PUBLIC INTEREST COMM; AKEROYD FM, 1991, BRIT J PHILOS SCI, V42, P535, DOI 10.1093/bjps/42.4.535; ARROW KJ, 1974, Q J ECON, V88, P312, DOI 10.2307/1883074; Arrow KJ, 1951, SOCIAL CHOICE INDIVI; BOARDMAN WS, 1999, NOTES UTILITARIAN JU; BUCHANAN JM, 1975, AM ECON REV, V65, P225; BUCHANAN JM, 1991, ECON PHILOS, V7, P167, DOI 10.1017/S026…	58	62	63	4	71	SPRINGER	DORDRECHT	VAN GODEWIJCKSTRAAT 30, 3311 GZ DORDRECHT, NETHERLANDS	0167-4544			J BUS ETHICS	J. Bus. Ethics	SEP	2007	74	3
J	Hahn, VC; Frese, M; Binnewies, C; Schmitt, A				Hahn, Verena C.; Frese, Michael; Binnewies, Carmen; Schmitt, Antje			Happy and Proactive? The Role of Hedonic and Eudaimonic Well-Being in Business Owners' Personal Initiative	ENTREPRENEURSHIP THEORY AND PRACTICE			English	Article							ENTREPRENEURIAL ORIENTATION; DAY-LEVEL; POSITIVE AFFECT; SUBJECTIVE VITALITY; DELIBERATE PRACTICE; EGO DEPLETION; THINGS HAPPEN; JOB STRESSORS; WORK; SELF	6	This two-year study with 122 business owners examined the link between affective well-being and task-oriented as well as relationship-oriented personal initiative (PI). We tested two complementary models explaining the link between well-being and PI: (1) broaden-and-build theory and (2) self-regulation as limited resource approach. In line with current research on well-being, we differentiated be…	[Hahn, Verena C.; Binnewies, Carmen] Johannes Gutenberg Univ Mainz, Inst Psychol, Mainz, Germany; [Frese, Michael] Natl Univ Singapore, Singapore 117548, Singapore; [Frese, Michael] Leuphana Univ Lueneburg, Dept Management & Org, Singapore, Singapore; [Frese, Michael] Dept Strateg Personnel Management, Singapore, Singapore; [Schmitt, Antje] Univ Kassel, Dept Business Psychol, Kassel, Germany	Hahn, VC (corresponding author), Johannes Gutenberg Univ Mainz, Inst Psychol, Mainz, Germany.	verena.hahn@uni-mainz.de; michfrese@gmail.com; carmen.binnewies@uni-mainz.de; aschmitt@uni-kassel.de	Haun, Verena C./W-9063-2019; Frese, Michael/B-4599-2008; Frese, Michael/B-3283-2014	Haun, Verena C./0000-0002-2060-8182; Frese, Michael/0000-0002-6462-4395; Frese, Michael/0000-0002-6462-4395			AVOLIO BJ, 1990, J APPL PSYCHOL, V75, P43, DOI 10.1037/0021-9010.75.1.43; Baron R.A., 2010, AC MAN C MONTR; Baron RA, 2008, ACAD MANAGE REV, V33, P328; Baumeister RF, 1998, J PERS SOC PSYCHOL, V74, P1252, DOI 10.1037/0022-3514.74.5.1252; Bierly PE, 2000, J ORGAN CHANGE MANAG, V13, P595, DOI 10.1108/09534810010378605; Binnewies C, 2010, J OCCUP ORGAN PSYCH, V83, P419, DOI 10.1348/096317909X418049;…	81	56	55	7	77	SAGE PUBLICATIONS INC	THOUSAND OAKS	2455 TELLER RD, THOUSAND OAKS, CA 91320 USA	1042-2587	1540-6520		ENTREP THEORY PRACT	Entrep. Theory Pract.	JAN	2012	36	1
J	Park, N; Peterson, C				Park, Nansook; Peterson, Christopher			Does It Matter Where We Live? The Urban Psychology of Character Strengths	AMERICAN PSYCHOLOGIST			English	Article						character strengths; US cities; urban psychology; entrepreneurship; presidential voting	WELL-BEING EVIDENCE; POSITIVE PSYCHOLOGY; CULTURAL VARIATION; COLLECTIVISM; VALIDATION; STATES; INDIVIDUALISM; TEMPERATURE; AGGRESSION; NATIONS		Psychology has neglected the study of variation across cities. An urban psychology is needed that takes seriously such variation and focuses on strengths and assets contributing to the good life as much as on problems of urbanization. To illustrate the value of an urban psychology, we describe studies of character strengths among residents in the 50 largest U.S. cities (N = 47,369). Differences i…	[Park, Nansook; Peterson, Christopher] Univ Michigan, Dept Psychol, Ann Arbor, MI 48109 USA	Park, N (corresponding author), Univ Michigan, Dept Psychol, 580 Union Dr, Ann Arbor, MI 48109 USA.	nspark@umich.edu; chrispet@umich.edu					ANDERSEN PA, 1987, COMMUN MONOGR, V54, P129; ANDERSON CA, 1989, PSYCHOL BULL, V106, P74, DOI 10.1037/0033-2909.106.1.74; Ash C, 2008, SCIENCE, V319, P739, DOI 10.1126/science.319.5864.739; Batty M, 2008, SCIENCE, V319, P769, DOI 10.1126/science.1151419; Baumeister R. F., 1986, IDENTITY CULTURAL CH; Berry DS, 2000, BASIC APPL SOC PSYCH, V22, P43, DOI 10.1207/15324830051036261; Black D, 1999, J POL…	74	53	55	1	42	AMER PSYCHOLOGICAL ASSOC	WASHINGTON	750 FIRST ST NE, WASHINGTON, DC 20002-4242 USA	0003-066X	1935-990X		AM PSYCHOL	Am. Psychol.	SEP	2010	65	6
J	Page, S				Page, S			Entrepreneurial strategies for managing interagency collaboration	JOURNAL OF PUBLIC ADMINISTRATION RESEARCH AND THEORY			English	Article									Public administration increasingly entails interagency collaboration, contracting, and other interorganizational arrangements. These loosely coupled alternatives to unified hierarchy alter the nature of managerial work. This article explores how the entrepreneurial strategies that managers find useful in hierarchical agencies apply in collaborative settings where formal authority is lacking and s…	Univ Washington, Seattle, WA 98195 USA	Page, S (corresponding author), Univ Washington, Seattle, WA 98195 USA.						AGRANOFF R, 1991, PUBLIC ADMIN REV, V51, P533, DOI 10.2307/976604; Bardach E, 2001, J PUBL ADM RES THEOR, V11, P149, DOI 10.1093/oxfordjournals.jpart.a003497; Bardach E., 1996, J PUBL ADM RES THEOR, V6, P197, DOI DOI 10.1093/OXFORDJOURNALS.JPART.A024307; Bardach E., 1998, GETTING AGENCIES WOR; Barzelay M., 1992, BREAKING BUREAUCRACY; BEHN R, 1991, LEADERSHIP COUNTS; Behn R. D., 2001, RETHINKING D…	77	52	53	1	15	OXFORD UNIV PRESS	OXFORD	GREAT CLARENDON ST, OXFORD OX2 6DP, ENGLAND	1053-1858	1477-9803		J PUBL ADM RES THEOR	J. Publ. Adm. Res. Theory	JUL	2003	13	3
J	Beckley, T; Parkins, J; Stedman, R				Beckley, T; Parkins, J; Stedman, R			Indicators of forest-dependent community sustainability: The evolution of research	FORESTRY CHRONICLE			English	Article						social indicators; community sustainability; model forest; forest-dependent communities; SIMFOR	PLACE		This paper describes the evolution of research on socio-economic indicators of community sustainability in several Canadian Model Forest locations since 1994. In the Foothills and Western Newfoundland Model Forests, we employed an "expert-driven" approach to indicator selection and reporting. We used census data to document change over time on key community profile variables such as age, employme…	Univ New Brunswick, Fac Forestry & Environm Management, Fredericton, NB E3B 5A3, Canada; Canadian Forest Serv, Ottawa, ON K1A 0C5, Canada; Penn State Univ, University Pk, PA 16802 USA	Beckley, T (corresponding author), Univ New Brunswick, Fac Forestry & Environm Management, Fredericton, NB E3B 5A3, Canada.		Parkins, John/M-2702-2016	Parkins, John/0000-0002-8005-0934			Beckley Thomas M., 1999, NORX360 NAT RES CAN; BECKLEY TM, 1995, SOC NATUR RESOUR, V8, P261, DOI 10.1080/08941929509380919; BECKLEY TM, 2000, UNDERSTANDING FOREST; BRANDENBURG AM, 1995, SOC NATUR RESOUR, V8, P381, DOI 10.1080/08941929509380931; *CCFM, 1997, CRIT IND SUST FOR MA; Den Otter M. A., 2002, MX215 NAT RES CAN; FORCE JE, 1997, SOC NATURAL RESOURCE, V10; Harris CC, 1998, J FOREST, V96, P11…	29	48	49	1	15	CANADIAN INST FORESTRY	MATTAWA	C/O CANADIAN ECOLOGY CENTRE, PO BOX 430, 6905 HWY 17 W, MATTAWA, ONTARIO P0H 1V0, CANADA	0015-7546			FOREST CHRON	For. Chron.	SEP-OCT	2002	78	5
J	Taris, TW; Geurts, SAE; Schaufeli, WB; Blonk, RWB; Lagerveld, SE				Taris, Toon W.; Geurts, Sabine A. E.; Schaufeli, Wilmar B.; Blonk, Roland W. B.; Lagerveld, Suzanne E.			All day and all of the night: The relative contribution of two dimensions of workaholism to well-being in self-employed workers	WORK AND STRESS			English	Article						workaholism; self-employed; entrepreneurs; effort expenditure; well-being; burnout; working hours; work-related stress	EFFORT-REWARD-IMBALANCE; RECOVERY; HEALTH; ANTECEDENTS; STRESS; CONSEQUENCES; DEFINITION; VALIDATION; DISEASE; RISK		This study examined the associations between workaholism and perceived health (exhaustion, physical complaints, and feelings of professional efficacy) in a sample of 477 Dutch self-employed workers. We defined workaholism as having two components: (1) spending many hours on one's work, and (2) the inability to detach from work. We expected that both workaholism components would be related to ill …	[Taris, Toon W.; Geurts, Sabine A. E.] Radboud Univ Nijmegen, Inst Behav Sci, Dept Work & Org Psychol, NL-6525 ED Nijmegen, Netherlands; [Schaufeli, Wilmar B.; Blonk, Roland W. B.] Univ Utrecht, Utrecht, Netherlands; [Blonk, Roland W. B.; Lagerveld, Suzanne E.] TNO Qual Life, Hoofddorp, Netherlands	Taris, TW (corresponding author), Radboud Univ Nijmegen, Inst Behav Sci, Dept Work & Org Psychol, NL-6525 ED Nijmegen, Netherlands.	T.Taris@psych.ru.nl	Schaufeli, Wilmar B/B-9645-2013; Geurts, Sabine/C-9638-2012	Schaufeli, Wilmar B/0000-0002-6070-7150; Taris, Toon/0000-0003-1946-3307			Aiken L. S., 1996, MULTIPLE REGRESSION; Baruch Y, 1999, HUM RELAT, V52, P421, DOI 10.1177/001872679905200401; Brett JM, 2003, J APPL PSYCHOL, V88, P67, DOI 10.1037/0021-9010.88.1.67; Burke RJ, 2004, STRESS HEALTH, V20, P301, DOI 10.1002/smi.1025; Burke RJ, 2000, STRESS MEDICINE, V16, P11, DOI 10.1002/(SICI)1099-1700(200001)16:1<11::AID-SMI825>3.0.CO;2-U; Burke RJ, 2006, NEW HORIZ MANAG, P173; de …	47	46	48	1	28	TAYLOR & FRANCIS LTD	ABINGDON	2-4 PARK SQUARE, MILTON PARK, ABINGDON OR14 4RN, OXON, ENGLAND	0267-8373	1464-5335		WORK STRESS	Work Stress		2008	22	2
J	Diochon, M; Anderson, AR				Diochon, Monica; Anderson, Alistair R.			Ambivalence and ambiguity in social enterprise; narratives about values in reconciling purpose and practices	INTERNATIONAL ENTREPRENEURSHIP AND MANAGEMENT JOURNAL			English	Article						Social enterprise; Narratives; Values; Purpose; Practices	ENTREPRENEURSHIP; ORGANIZATIONS; CONSTRUCTION		Social enterprises are unusual change organizations; typically their purpose is to bring about change to improve social well-being. Yet they do so in unusual ways. Traditional entrepreneurs generate social value as a by-product of economic value; whereas for social entrepreneurs the reverse is true. This brings about an ambiguity in integrating business and social well being, most manifest in ide…	[Anderson, Alistair R.] Robert Gordon Univ, Aberdeen Business Sch, Aberdeen AB10 7QE, Scotland; [Diochon, Monica] St Francis Xavier Univ, Gerald Schwartz Sch Business & Informat Syst, Antigonish, NS B2G 2W5, Canada	Anderson, AR (corresponding author), Robert Gordon Univ, Aberdeen Business Sch, Garthdee Rd, Aberdeen AB10 7QE, Scotland.	a.r.anderson@rgu.ac.uk	Anderson, Alistair/V-3568-2019	Anderson, Alistair/0000-0002-1072-4593			Agle BR, 1999, BUSINESS SOC, V38, P326, DOI DOI 10.1177/000765039903800305; Allan B, 2005, SOC ENTERP J, V1, P57, DOI 10.1108/17508610580000707; Alter S. A., 2006, SOCIAL ENTREPRENEURS, P209; Anderson A. R., 2000, INT J ENTREPRENEURIA, V6, P5, DOI DOI 10.1108/13552550010323050; Anderson A. R., 2000, J ENTERP CULT, V8, P201, DOI DOI 10.1142/S0218495800000127; Anderson A, 2009, INT SMALL BUS J, V27…	64	42	42	2	68	SPRINGER	NEW YORK	ONE NEW YORK PLAZA, SUITE 4600, NEW YORK, NY, UNITED STATES	1554-7191	1555-1938		INT ENTREP MANAG J	Int. Entrep. Manag. J.	MAR	2011	7	1
J	Shepherd, DA; Haynie, JM				Shepherd, Dean A.; Haynie, J. Michael			VENTURE FAILURE, STIGMA, AND IMPRESSION MANAGEMENT: A SELF-VERIFICATION, SELF-DETERMINATION VIEW	STRATEGIC ENTREPRENEURSHIP JOURNAL			English	Article						stigma; failure; well-being; impression management; entrepreneurship	ORGANIZATIONAL IDENTITY THREATS; PROTECTIVE PROPERTIES; EMPIRICAL-ANALYSIS; SOCIAL-INTERACTION; THEORY PERSPECTIVE; TOP MANAGERS; ESTEEM; IDENTIFICATION; BANKRUPTCY; MOTIVATION	5	We offer a theoretical basis for understanding how and to what end entrepreneurs employ impression management strategies in response to the negative attributions associated with the stigma of venture failure. Our framework offers counterintuitive insights into why some entrepreneurs stigmatized by failure will use impression management strategies to align their conception of self with how others …	[Haynie, J. Michael] Syracuse Univ, Whitman Sch Management, Dept Entrepreneurship & Emerging Enterprises, Syracuse, NY 13244 USA; [Shepherd, Dean A.] Indiana Univ, Kelley Sch Business, Bloomington, IN USA	Haynie, JM (corresponding author), Syracuse Univ, Whitman Sch Management, Dept Entrepreneurship & Emerging Enterprises, 721 Univ Ave, Syracuse, NY 13244 USA.	jmhaynie@syr.edu					Aldrich H, 1999, ORG EVOLVING; Aldrich H.E., 1979, ORG ENV; Aldrich H. E., 1986, RES ORGAN BEHAV, V8, P165; Appelbaum E, 2000, MANUFACTURING ADVANT; ASHFORD SJ, 1991, ACAD MANAGE J, V34, P251, DOI 10.2307/256442; Ashforth BE, 1999, ACAD MANAGE REV, V24, P413, DOI 10.5465/AMR.1999.2202129; ASHFORTH BE, 1989, ACAD MANAGE REV, V14, P20, DOI 10.2307/258189; Bailyn L., 1993, BREAKING MOLD WOMEN; BATCH…	154	41	42	5	94	WILEY-BLACKWELL	HOBOKEN	111 RIVER ST, HOBOKEN 07030-5774, NJ USA	1932-4391	1932-443X		STRATEG ENTREP J	Strateg. Entrep. J.	JUN	2011	5	2
J	Naidoo, P; Sharpley, R				Naidoo, Perunjodi; Sharpley, Richard			Local perceptions of the relative contributions of enclave tourism and agritourism to community well-being: The case of Mauritius	JOURNAL OF DESTINATION MARKETING & MANAGEMENT			English	Article						Tourism development; Community well-being; Enclave tourism; Agritourism; Island tourism; Mauritius	ISLAND DEVELOPING STATES; QUALITY-OF-LIFE; RESIDENTS ATTITUDES; ECONOMIC-GROWTH; SUNSHINE COAST; SOCIAL IMPACTS; DIVERSIFICATION; BENEFITS; FARM; DESTINATION		To date, limited attention has been paid to the contribution of tourism to the well-being of island residents in general and to whether such well-being varies according to the nature of tourism development in particular. Specifically, island tourism is frequently manifested in resort-based enclave development, a form of tourism that is often criticised for its assumed limited benefits to the wide…	[Naidoo, Perunjodi] Univ Technol Mauritius, Port Louis, Mauritius; [Sharpley, Richard] Univ Cent Lancashire, Preston PR1 2HE, Lancs, England	Naidoo, P (corresponding author), Univ Technol Mauritius, Port Louis, Mauritius.	pnaidoo@umail.utm.ac.mu; rajsharpley@uclan.ac.uk					AHRIM, 2007, ANN REP 2007 2008; AMATO PR, 1992, SOCIOL QUART, V33, P229, DOI 10.1111/j.1533-8525.1992.tb00373.x; Andereck KL, 2011, J TRAVEL RES, V50, P248, DOI 10.1177/0047287510362918; Andereck KL, 2005, ANN TOURISM RES, V32, P1056, DOI 10.1016/j.annals.2005.03.001; Anderson W, 2011, ANATOLIA, V22, P361, DOI 10.1080/13032917.2011.633041; Andriotis K., 2003, J TRAVEL RES, V42, P172, DOI DOI 10.1…	129	40	40	4	50	ELSEVIER SCIENCE BV	AMSTERDAM	PO BOX 211, 1000 AE AMSTERDAM, NETHERLANDS	2212-571X			J DESTIN MARK MANAGE	J. Destin. Mark. Manag.	MAR	2016	5	1
J	Imas, JM; Wilson, N; Weston, A				Imas, J. Miguel; Wilson, Nick; Weston, Alia			Barefoot entrepreneurs	ORGANIZATION			English	Article						Keywords Barefoot entrepreneur; critical entrepreneurship; economy; indigenous entrepreneur; marginality; microstoria	CHILD LABOR; THINGS; FIELD; AGE		This article makes a contribution to critical entrepreneurship studies through exploring 'barefoot' entrepreneur[ing], i.e. the entrepreneurial practices and narratives of individuals who live primarily in marginal, poor and excluded places and contexts. Drawing on Max-Neef's barefoot economics and a methodology based on the authoring and sharing of microstorias, the article asks how agents in de…	[Imas, J. Miguel] Kingston Univ, Fac Business & Law, Dept Leadership HRM & Org, Kingston upon Thames KT2 7LB, Surrey, England; [Wilson, Nick] Kings Coll London, London WC2R 2LS, England; [Weston, Alia] Univ Strathclyde, Dept Management, Strathclyde Business Sch, Glasgow G4 0QU, Lanark, Scotland	Imas, JM (corresponding author), Kingston Univ, Fac Business & Law, London, England.	j.imas@kingston.ac.uk; nick.wilson@kcl.ac.uk; alia.weston@strath.ac.uk		Wilson, Nick/0000-0002-8178-9693; Imas, Miguel/0000-0003-2947-8086			Acs Z.J., 2006, INNOVATIONS TECHNOLO, V1, P97, DOI DOI 10.1162/ITGG.2006.1.1.97; Ahl H, 2004, SCI REPROD GENDER IN; Anderson RB, 1999, EC DEV ABORIGINAL PE; Anderson RB, 2003, INT RES BUS DISCIPL, V4, P141, DOI 10.1016/S1074-7877(03)04007-8; ARNDT HW, 1983, ECON DEV CULT CHANGE, V32, P1, DOI 10.1086/451369; BANDURA A, 1977, PSYCHOL REV, V84, P191, DOI 10.1037/0033-295X.84.2.191; Banerjee S, 2010,…	129	38	38	2	36	SAGE PUBLICATIONS LTD	LONDON	1 OLIVERS YARD, 55 CITY ROAD, LONDON EC1Y 1SP, ENGLAND	1350-5084	1461-7323		ORGANIZATION	Organization	OCT	2012	19	5
J	Payne, D; Joyner, BE				Payne, D; Joyner, BE			Successful US entrepreneurs: Identifying ethical decision-making and social responsibility behaviors	JOURNAL OF BUSINESS ETHICS			English	Article						Entrepreneurs; ethics; social responsibility; decision-making			This two-part study analyzed some of the ethical choices made by founding entrepreneurs during the creation and development of their ventures in order to identify the areas in which founding entrepreneurs must make decisions related to ethics or social responsibility during venture creation and development. Content analysis was used to identify decisions with ethical components and/or implication…	Univ New Orleans, New Orleans, LA 70148 USA; Loyola Univ, New Orleans, LA 70118 USA	Payne, D (corresponding author), Univ New Orleans, New Orleans, LA 70148 USA.	dmpayne@uno.edu; bjoyner@loyno.edu					BROKAW L, 1992, ETHICS BOOT STRAPPIN, P87; Brown D. J., 1982, J SMALL BUS MANAGE, V20, P11; Bucar B, 2001, J DEV ENTREPRENEURSH, V6, P59; CASE J, 1990, HONEST BUSINESS, P65; CHRISMAN JJ, 1982, J SMALL BUSINESS JAN, P19; deLeon L, 1996, POLICY STUD J, V24, P495, DOI 10.1111/j.1541-0072.1996.tb01642.x; Haney WM, 1996, DAEDALUS, V125, P95; Humphreys N., 1993, J SMALL BUS MANAGE, P9; JOYNER BE, 2002,…	24	35	39	1	25	SPRINGER	DORDRECHT	VAN GODEWIJCKSTRAAT 30, 3311 GZ DORDRECHT, NETHERLANDS	0167-4544			J BUS ETHICS	J. Bus. Ethics	MAY	2006	65	3
J	Tlaiss, HA				Tlaiss, Hayfaa A.			How Islamic Business Ethics Impact Women Entrepreneurs: Insights from Four Arab Middle Eastern Countries	JOURNAL OF BUSINESS ETHICS			English	Article						Business ethics; Arab Middle East; Hadeeth; Islam/Muslim; Qur'an; Women entrepreneurs	MANAGEMENT; FEMALE; GENDER; CAREER; WORK; PERSPECTIVE; FRAMEWORK; CONTEXT; FAMILY		This study explores how Islamic business ethics and values impact the way in which Muslim women entrepreneurs conduct their business in the Arab world. Guided by institutional theory as a theoretical framework and social constructionism as a philosophical stance, this study uses a qualitative, interview-based methodology. Capitalizing on in-depth, face-to-face interviews with Muslim Arab women en…	Univ New Brunswick, Fac Business, St John, NB E2L 4L5, Canada	Tlaiss, HA (corresponding author), Univ New Brunswick, Fac Business, 100 Tucker Pk Rd,POB 5050, St John, NB E2L 4L5, Canada.	htlaiss@unb.ca					Ahmad M., 1995, BUSINESS ETHICS ISLA; Ahmad SZ, 2011, INT J GEND ENTREP, V3, P123, DOI 10.1108/17566261111140206; Akbar M., 1993, J ENTREPRENEURSHIP, V2, P135; Al Sheik B., 2000, TOTAL QUALITY ISLAM; Al-Dajani H, 2010, INT SMALL BUS J, V28, P470, DOI 10.1177/0266242610370392; ALI A, 1988, J SOC PSYCHOL, V128, P575, DOI 10.1080/00224545.1988.9922911; Ali Abdullah Yusuf, 1938, HOLY QURAN TEXT TRAN;…	94	34	34	6	73	SPRINGER	DORDRECHT	VAN GODEWIJCKSTRAAT 30, 3311 GZ DORDRECHT, NETHERLANDS	0167-4544	1573-0697		J BUS ETHICS	J. Bus. Ethics	JUL	2015	129	4
J	Huggins, R; Thompson, P				Huggins, Robert; Thompson, Piers			Culture, entrepreneurship and uneven development: a spatial analysis	ENTREPRENEURSHIP AND REGIONAL DEVELOPMENT			English	Article						entrepreneurship; well-being; community culture; context; culture; localities; uneven development	SELF-EMPLOYMENT; FIRM FORMATION; ECONOMIC-DEVELOPMENT; BUSINESS OWNERSHIP; OECD COUNTRIES; PANEL-DATA; COMMUNITY; GROWTH; INSTITUTIONS; DETERMINANTS		Interest in the proposed connection between culture and entrepreneurship has grown significantly in recent years. However, less attention has been given to the nature of the overall impact of this proposed association on development outcomes, particularly at the local level. In response, this paper analyses the relationship between the nature of the culture, entrepreneurship and development exper…	[Huggins, Robert] Cardiff Univ, Sch Planning & Geog, Cardiff CF10 3AX, S Glam, Wales; [Thompson, Piers] Nottingham Trent Univ, Nottingham Business Sch, Nottingham, England	Huggins, R (corresponding author), Cardiff Univ, Sch Planning & Geog, Cardiff CF10 3AX, S Glam, Wales.	HugginsR@cardiff.ac.uk	Thompson, Piers/R-5828-2019	Thompson, Piers/0000-0003-1961-7441			AEA, 2011, LOC REG CARB DIOX EM; Aghion P, 2004, Q J ECON, V119, P565, DOI 10.1162/0033553041382148; Agnew JA, 1989, POWER PLACE BRINGING, P9; Anderson A.R., 2003, J SOCIO-ECON, V32, P17, DOI DOI 10.1016/S1053-5357(03)00009-X; Anderson AR, 2007, ENTREP REGION DEV, V19, P479, DOI 10.1080/08985620701672377; Andersson P., 2008, J SOCIO-ECON, V37, P213, DOI DOI 10.1016/J.S0CEC.2007.03.003; Armington …	171	34	35	4	51	ROUTLEDGE JOURNALS, TAYLOR & FRANCIS LTD	ABINGDON	2-4 PARK SQUARE, MILTON PARK, ABINGDON OX14 4RN, OXON, ENGLAND	0898-5626	1464-5114		ENTREP REGION DEV	Entrep. Reg. Dev.	44105	2014	26	44113
J	Hjalager, AM; Johansen, PH				Hjalager, Anne-Mette; Johansen, Pia Heike			Food tourism in protected areas - sustainability for producers, the environment and tourism?	JOURNAL OF SUSTAINABLE TOURISM			English	Article						national park; food; producers; governance; strategy	LOCAL FOOD; DIVERSIFICATION; STAKEHOLDERS; AUTHENTICITY; MANAGEMENT; FAMILY		This study investigates the feasibility of combining environmental protection and an agricultural revitalisation strategy which includes food tourism in two Danish national parks, Mols Bjerge and Skjern Aadal. Both the parks include significant agricultural holdings and, to a great extent, a "natural" landscape of farmed grassland and arable land. The international research literature documents t…	[Hjalager, Anne-Mette; Johansen, Pia Heike] Univ Southern Denmark, Danish Ctr Rural Res, Esbjerg, Denmark	Johansen, PH (corresponding author), Univ Southern Denmark, Danish Ctr Rural Res, Esbjerg, Denmark.	piaj@sam.sdu.dk	Hjalager, Anne-Mette/J-5454-2017	Hjalager, Anne-Mette/0000-0001-5648-4401			Bock BB, 2004, SOCIOL RURALIS, V44, P245, DOI 10.1111/j.1467-9523.2004.00274.x; Boniface P., 2003, TASTING TOURISM TRAV; Bramwell B., 1994, J SUSTAIN TOUR, V2, P1, DOI DOI 10.1080/09669589409510679; Brandth B, 2010, SIGNS, V35, P425, DOI 10.1086/605480; Brink T., 2010, 22010 CLF U SO DENM; Busby G, 2000, TOURISM MANAGE, V21, P635, DOI 10.1016/S0261-5177(00)00011-X; Byrd ET, 2007, TOUR REV, V62, P…	49	34	36	6	65	CHANNEL VIEW PUBLICATIONS	CLEVEDON	FRANKFURT LODGE, CLEVEDON HALL, VICTORIA ROAD, CLEVEDON, BS21 7HH, ENGLAND	0966-9582	1747-7646		J SUSTAIN TOUR	J. Sustain. Tour.		2013	21	3
J	Binder, M; Coad, A				Binder, Martin; Coad, Alex			How Satisfied are the Self-Employed? A Life Domain View	JOURNAL OF HAPPINESS STUDIES			English	Article						Subjective well-being; Self-employment; Domain satisfaction; Matching estimators; SOEP	JOB-SATISFACTION; MATCHING ESTIMATORS; ENTREPRENEURSHIP; DETERMINANTS; WORK; CAREER; HAPPINESS; LEARN; HAPPY; PANEL		It is well-known in the literature that self-employment positively influences job satisfaction, but the effects on other life domains and overall life satisfaction are much less clear. Our study analyzes the welfare effects of self-employment apart from its monetary aspects, and focuses on the overall life satisfaction as well as different domain satisfactions of self-employed individuals in our …	[Binder, Martin] Bard Coll Berlin, Platanenstr 24, D-13156 Berlin, Germany; [Binder, Martin] Bard Coll, Levy Econ Inst, Annandale On Hudson, NY 12504 USA; [Coad, Alex] European Commiss, JRC IPTS, Edificio EXPO,JRC ITPS KFG C Inca Garcilaso 3, Seville 41092, Spain	Binder, M (corresponding author), Bard Coll Berlin, Platanenstr 24, D-13156 Berlin, Germany.; Binder, M (corresponding author), Bard Coll, Levy Econ Inst, Annandale On Hudson, NY 12504 USA.	m.binder@berlin.bard.edu; Alexander.COAD@ec.europa.eu	Binder, Martin/AAF-6448-2020; Coad, alexander/H-8938-2012	Binder, Martin/0000-0002-5053-3804; Coad, alexander/0000-0002-5706-0528	ESRC-TSB-BIS-NESTA [ES/J008427/1]; Economic and Social Research CouncilEconomic & Social Research Council (ESRC) [ES/J008427/1] Funding Source: Researchfish	We are grateful to Simon Parker for many helpful comments. We also want to thank two anonymous referees for their suggestions. This research was funded by the ESRC-TSB-BIS-NESTA as part of the ES/J008427/1 grant on Skills, Knowledge, Innovation, Policy and Practice (SKIPPY). The data used in this publication were made available to us by the German Socio Economic Panel Study (GSOEP) at the German …	Abadie A, 2004, STATA J, V4, P290, DOI 10.1177/1536867X0400400307; Aguinis H, 2014, J MANAGE STUD, V51, P143, DOI 10.1111/joms.12058; Ajayi-Obe O, 2005, J LABOR RES, V26, P501, DOI 10.1007/s12122-005-1017-1; Almus M, 2003, J BUS ECON STAT, V21, P226, DOI 10.1198/073500103288618918; Andersson P., 2008, J SOCIO-ECON, V37, P213, DOI DOI 10.1016/J.S0CEC.2007.03.003; Benz M, 2008, ECONOMICA, V75, P362…	79	32	32	4	34	SPRINGER	DORDRECHT	VAN GODEWIJCKSTRAAT 30, 3311 GZ DORDRECHT, NETHERLANDS	1389-4978	1573-7780		J HAPPINESS STUD	J. Happiness Stud.	AUG	2016	17	4
J	Kuhn, KM; Maleki, A				Kuhn, Kristine M.; Maleki, Amir			MICRO-ENTREPRENEURS, DEPENDENT CONTRACTORS, AND INSTASERFS: UNDERSTANDING ONLINE LABOR PLATFORM WORKFORCES	ACADEMY OF MANAGEMENT PERSPECTIVES			English	Article							ORGANIZATIONAL SUPPORT; EMPLOYEE SATISFACTION; UNIT-LEVEL; WORK; TEMPORARY; MARKET; TRUST; INTERMEDIARIES; TURNOVER; BUSINESS		The rapidly growing number of people who find work via online labor platforms are not employees, nor do they necessarily fit traditional conceptualizations of independent contractors, freelancers, or the self-employed. The ambiguous nature of their employment status and its implications for worker well-being have attracted substantial controversy, but to date most empirical research in this area …	[Kuhn, Kristine M.] Washington State Univ, Management, Pullman, WA 99164 USA; [Maleki, Amir] Washington State Univ, Management & Entrepreneurship, Carson Coll Business, Pullman, WA 99164 USA	Kuhn, KM (corresponding author), Washington State Univ, Management, Pullman, WA 99164 USA.	kmkuhn@wsu.edu; ah.maleki@wsu.edu					Allon G, 2012, MANAGE SCI, V58, P1854, DOI 10.1287/mnsc.1120.1533; Ashford SJ, 2007, ACAD MANAG ANN, V1, P65, DOI 10.1080/078559807; Baran BE, 2012, J BUS PSYCHOL, V27, P123, DOI 10.1007/s10869-011-9236-3; Barley S. R., 2006, GURUS HIRED GUNS WAR; Berg Janine, 2016, COMP LABOR LAW POLIC, V37, P543; Bergman ME, 2016, IND ORGAN PSYCHOL-US, V9, P84, DOI 10.1017/iop.2015.70; Bidwell MJ, 2009, ACAD MA…	86	30	30	8	63	ACAD MANAGEMENT	BRIARCLIFF MANOR	PACE UNIV, PO BOX 3020, 235 ELM RD, BRIARCLIFF MANOR, NY 10510-8020 USA	1558-9080			ACAD MANAGE PERSPECT	Acad. Manag. Perspect.	AUG 1	2017	31	3
J	Hjalager, AM; Flagestad, A				Hjalager, Anne-Mette; Flagestad, Arvid			Innovations in well-being tourism in the Nordic countries	CURRENT ISSUES IN TOURISM			English	Article						innovation; diversification; technology; institutions; Nordic countries; well-being	CLUSTERS; HEALTH		Innovation in tourism is an emerging research theme, and there is a growing understanding of the frameworks for and circumstances involving innovative activities in the sector. However, there is also a need to uncover the particularities of innovations in its sub-sectors. Based on case studies in Denmark, Finland, Iceland, Norway and Sweden, this article investigates categories of product innovat…	[Hjalager, Anne-Mette] Univ So Denmark, Danish Ctr Rural Res, Esbjerg, Denmark; [Flagestad, Arvid] Oslo Sch Management, Oslo, Norway	Hjalager, AM (corresponding author), Univ So Denmark, Danish Ctr Rural Res, Esbjerg, Denmark.	hjalager@sam.sdu.dk	Hjalager, Anne-Mette/J-5454-2017	Hjalager, Anne-Mette/0000-0001-5648-4401			Bieger T, 2006, INNOVATION PRODUCT D, P88; Blichfeldt BS, 2009, PASOS, V7, P415; Brendon P., 1991, T COOK 150 YEARS POP; Bushell R., 2009, WELLNESS TOURISM MIN; Cohen M, 2008, UNDERSTANDING GLOBAL; Drejer I, 2004, RES POLICY, V33, P551, DOI 10.1016/j.respol.2003.07.004; Dwyer L, 2009, INT J TOUR RES, V11, P321, DOI 10.1002/jtr.690; Enz C. A., 2003, Cornell Hotel and Restaurant Administration Quar…	47	30	31	3	56	ROUTLEDGE JOURNALS, TAYLOR & FRANCIS LTD	ABINGDON	2-4 PARK SQUARE, MILTON PARK, ABINGDON OX14 4RN, OXON, ENGLAND	1368-3500	1747-7603		CURR ISSUES TOUR	Curr. Issues Tour.		2012	15	8
J	Sridharan, S; Maltz, E; Viswanathan, M; Gupta, S				Sridharan, Srinivas; Maltz, Elliot; Viswanathan, Madhubalan; Gupta, Samir			Transformative Subsistence Entrepreneurship: A Study in India	JOURNAL OF MACROMARKETING			English	Article						subsistence entrepreneurs; entrepreneurship; micro enterprise; India; macromarketing	POVERTY REDUCTION; SYSTEMS; ORGANIZATION		There are millions of subsistence entrepreneurs around the world, located primarily in developing countries, engaging in micro enterprise to eke out a survival living when other labor market options become unavailable. However, the vast majority of them are trapped in a survival and maintenance cycle. This article focuses on a phenomenon involving a subset of subsistence entrepreneurs who do mana…	[Sridharan, Srinivas; Gupta, Samir] Monash Univ, Fac Business & Econ, Caulfield, Vic 3145, Australia; [Maltz, Elliot] Willamette Univ, Atkinson Grad Sch Management, Salem, OR 97301 USA; [Viswanathan, Madhubalan] Univ Illinois, Coll Business, Champaign, IL 61820 USA	Sridharan, S (corresponding author), Monash Univ, Dept Mkt, 26 Sir John Monash Dr, Caulfield, Vic 3145, Australia.	srinivas.sridharan@monash.edu	Sridharan, Srinivas/C-8397-2014	Sridharan, Srinivas/0000-0001-6450-8071			Acs Z.J., 2006, INNOVATIONS TECHNOLO, V1, P97, DOI DOI 10.1162/ITGG.2006.1.1.97; Alejandro Portes, 1994, INFORMAL EC ITS PARA; Amartya S., 1999, DEV FREEDOM; ANDREASEN AR, 1993, J PUBLIC POLICY MARK, V12, P270, DOI 10.1177/074391569101200213; Atance CM, 2001, TRENDS COGN SCI, V5, P533, DOI 10.1016/S1364-6613(00)01804-0; Baker Stacey Menzel, 2005, J MACROMARKETING, V25, P128, DOI DOI 10.1177/02761…	55	29	30	1	27	SAGE PUBLICATIONS INC	THOUSAND OAKS	2455 TELLER RD, THOUSAND OAKS, CA 91320 USA	0276-1467	1552-6534		J MACROMARKETING	J. Macromarketing	DEC	2014	34	4
J	Newman, A; Schwarz, S; Borgia, D				Newman, Alexander; Schwarz, Susan; Borgia, Daniel			How does microfinance enhance entrepreneurial outcomes in emerging economies? The mediating mechanisms of psychological and social capital	INTERNATIONAL SMALL BUSINESS JOURNAL-RESEARCHING ENTREPRENEURSHIP			English	Article						social capital; support mechanisms; psychological capital; emerging economies; microfinance; entrepreneurial outcomes	POSITIVE ORGANIZATIONAL-BEHAVIOR; SELF-EFFICACY; VENTURE PERFORMANCE; IMPACT; CREDIT; FIELD; MICROENTERPRISE; CREATION; SUCCESS; WOMEN		In this article, a conceptual framework and research propositions are developed to explain how microfinance provision can translate into new venture creation and existing venture growth in an emerging economy context by engendering higher levels of psychological and social capital in clients. In doing this, the extent to which microfinance institutions provide business support and opportunities f…	[Newman, Alexander] Monash Univ, Melbourne, Vic 3800, Australia; [Schwarz, Susan; Borgia, Daniel] Nottingham Univ Business Sch China, Ningbo, Zhejiang, Peoples R China	Newman, A (corresponding author), Monash Univ, Dept Management, Sch Business & Econ, 900 Dandenong Rd, Melbourne, Vic 3800, Australia.	alex.newman@monash.edu	Newman, Alexander/AAH-7376-2020; Borgia, Daniel/AAM-8616-2020	Newman, Alexander/0000-0003-1170-8947; Schwarz, Susan/0000-0002-6982-9373			Adekunle B, 2011, INT SMALL BUS J, V29, P360, DOI 10.1177/0266242610369751; Adler PS, 2002, ACAD MANAGE REV, V27, P17, DOI 10.2307/4134367; Afrin S., 2010, J BUSINESS MANAGEMEN, V16, P9; Ahlstrom D, 2011, ASIA PACIFIC J MANAG; Armendariz B, 2010, EC MICROFINANCE; Armendariz B, 2011, HDB MICROFINANCE; Attanasio O., 2011, 136 EBRD; Avey JB, 2010, J MANAGE, V36, P430, DOI 10.1177/0149206308329961; B…	125	29	29	2	83	SAGE PUBLICATIONS LTD	LONDON	1 OLIVERS YARD, 55 CITY ROAD, LONDON EC1Y 1SP, ENGLAND	0266-2426	1741-2870		INT SMALL BUS J	Int. Small Bus. J.-Res. Entrep.	MAR	2014	32	2
J	Seva, IJ; Vinberg, S; Nordenmark, M; Strandh, M				Seva, Ingemar Johansson; Vinberg, Stig; Nordenmark, Mikael; Strandh, Mattias			Subjective well-being among the self-employed in Europe: macroeconomy, gender and immigrant status	SMALL BUSINESS ECONOMICS			English	Article						Self-employment; Subjective well-being; Life satisfaction; Economic growth; Immigrant status; Gender; Europe	MENTAL-HEALTH; WORK; ENTREPRENEURSHIP; SATISFACTION; FAMILY; DETERMINANTS; PERSONALITY; HAPPINESS; STRATEGY; STRESS	14	Previous research shows that the self-employed generally experience a higher degree of job satisfaction compared to regular employees. However, our knowledge of subjective well-being among the self-employed, the differences between various groups of self-employed and the potential influence of contextual factors is somewhat limited. The purpose of the present paper is to address this gap by takin…	[Seva, Ingemar Johansson; Strandh, Mattias] Umea Univ, Dept Sociol, Umea, Sweden; [Vinberg, Stig; Nordenmark, Mikael] Mid Sweden Univ, Dept Hlth Sci, Ostersund, Sweden; [Strandh, Mattias] Umea Univ, Dept Social Work, Umea, Sweden; [Strandh, Mattias] Karlstad Univ, Ctr Res Child & Adolescent Mental Hlth, Karlstad, Sweden	Seva, IJ (corresponding author), Umea Univ, Dept Sociol, Umea, Sweden.	ingemar.johansson.seva@soc.umu.se; Stig.Vinberg@miun.se; Mikael.Nordenmark@miun.se; mattias.strandh@socw.umu.se		Johansson Seva, Ingemar/0000-0003-3349-5778			Aldrich HE, 1981, RES SOCIAL STRATIFIC; Amoros J.E., 2013, GLOBAL ENTREPRENEURS; Andersson L, 2010, SMALL BUS ECON, V34, P261, DOI 10.1007/s11187-008-9117-y; Andersson P., 2008, J SOCIO-ECON, V37, P213, DOI DOI 10.1016/J.S0CEC.2007.03.003; Benavides FG, 2000, J EPIDEMIOL COMMUN H, V54, P494, DOI 10.1136/jech.54.7.494; Benz M., 2004, SWEDISH EC POLICY RE, V12, P97; Benz M, 2008, ECONOMICA, V75, P3…	66	28	28	6	81	SPRINGER	DORDRECHT	VAN GODEWIJCKSTRAAT 30, 3311 GZ DORDRECHT, NETHERLANDS	0921-898X	1573-0913		SMALL BUS ECON	Small Bus. Econ. Group	FEB	2016	46	2
J	Muller, R; Zhai, L; Wang, AY; Shao, JL				Muller, Ralf; Zhai, Li; Wang, Anyu; Shao, Jingling			A framework for governance of projects: Govemmentality, governance structure and projectification	INTERNATIONAL JOURNAL OF PROJECT MANAGEMENT			English	Article						Project governance; Governmentality; Governance of projects; Projectification	ORGANIZATIONAL ENABLERS; PERFORMANCE; MANAGEMENT; TRUST; GOVERNMENTALITY; ENTREPRENEURS; MATTERS; ETHICS		This paper develops a general-purpose framework for the governance of projects. The framework is structured by the concepts of governmentality and governance of projects, in the context of different levels of projectification in organizations. It visualizes the organization specific profiles for these concepts. The dimensions and scales underlying the three concepts derived mainly from the litera…	[Muller, Ralf] BI Norwegian Business Sch, Dept Leadership & Org Behav, Nydalsveien 37, N-0442 Oslo, Norway; [Zhai, Li; Wang, Anyu] Fudan Univ, Sch Management, Dept Management Sci, 670 Guoshun Rd, Shanghai, Peoples R China; [Shao, Jingling] Chinese Acad Social Sci, Inst Ind Econ, Beijing, Peoples R China	Muller, R (corresponding author), BI Norwegian Business Sch, Dept Leadership & Org Behav, Nydalsveien 37, N-0442 Oslo, Norway.	ralf.muller@bi.no; lizhai@fudan.edu.cn; aywang@fudan.edu.cn; jingtingshao@126.com	Muller, Ralf/Y-3517-2018	Muller, Ralf/0000-0001-5737-8117	BI-Fudan Research Fund	The authors thank the BI-Fudan Research Fund for their financial support without which this study would not have been possible.	Alvesson M, 2000, HUM RELAT, V53, P1125, DOI 10.1177/0018726700539002; Alvesson M., 2009, REFLEXIVE METHODOLOG; Alvesson M, 2007, ACAD MANAGE REV, V32, P1265, DOI 10.5465/amr.2007.26586822; AMIHUD Y, 1981, BELL J ECON, V12, P605, DOI 10.2307/3003575; Archer M, 1998, CRITICAL REALISM ESS; Aubry M., 2012, GOVERNANCE COMMUNITI; Ayoob M., 2002, INT J HUMAN RIGHTS, V6, P81, DOI DOI 10.1080/714003751; …	76	27	27	4	72	ELSEVIER SCI LTD	OXFORD	THE BOULEVARD, LANGFORD LANE, KIDLINGTON, OXFORD OX5 1GB, OXON, ENGLAND	0263-7863	1873-4634		INT J PROJ MANAG	Int. J. Proj. Manag.	AUG	2016	34	6
J	Williams, TA; Shepherd, DA				Williams, Trenton A.; Shepherd, Dean A.			Victim entrepreneurs doing well by doing good: Venture creation and well-being in the aftermath of a resource shock	JOURNAL OF BUSINESS VENTURING			English	Article						Venture creation; Resilience; Resourceful response to adversity; Compassion; Conservation of resources theory	HIGH-EXPOSURE SURVIVORS; NATURAL DISASTER; PROSOCIAL IMPACT; SOCIAL SUPPORT; PROCESS MODEL; CONSERVATION; COMMUNITY; SELF; RESILIENCE; COMPASSION	5	Venture creation generates value in a variety of forms both for the entrepreneur him or herself and the venture's stakeholders. Recent research explores entrepreneurial action as a vehicle for personal transformation and development for the individual, especially as it pertains to overcoming adversity. We build on this emerging literature by exploring victims creating new ventures in the aftermat…	[Williams, Trenton A.] Syracuse Univ, Whitman Sch Management, Entrepreneurship & Emerging Enterprises Dept, 721 Univ Ave, Syracuse, NY 13244 USA; [Shepherd, Dean A.] Indiana Univ, Kelley Sch Business, Management & Entrepreneurship Dept, 1309 E Tenth St, Bloomington, IN 47405 USA	Williams, TA (corresponding author), Syracuse Univ, Whitman Sch Management, Entrepreneurship & Emerging Enterprises Dept, 721 Univ Ave, Syracuse, NY 13244 USA.	tawil101@syr.edu; shepherd@indiana.edu					ANDERSON JC, 1988, PSYCHOL BULL, V103, P411, DOI 10.1037/0033-2909.103.3.411; Baker T, 2005, ADMIN SCI QUART, V50, P329, DOI 10.2189/asqu.2005.50.3.329; Bartholomew S, 2006, ENTREP THEORY PRACT, V30, P83, DOI 10.1111/j.1540-6520.2006.00111.x; Becker G., 1964, HUMAN CAPITAL; Beder J., 2005, J DEATH DYING, V50, P255, DOI DOI 10.2190/GXH6-8VY6-BQ0R-GC04; Benight CC, 1999, ANXIETY STRESS COPIN, V12, …	123	27	27	8	81	ELSEVIER	AMSTERDAM	RADARWEG 29, 1043 NX AMSTERDAM, NETHERLANDS	0883-9026	1873-2003		J BUS VENTURING	J. Bus. Ventur.	JUL	2016	31	4
J	Patel, PC; Thatcher, SMB				Patel, Pankaj C.; Thatcher, Sherry M. B.			Sticking It Out: Individual Attributes and Persistence in Self-Employment	JOURNAL OF MANAGEMENT			English	Article						self-employment; Big Five personality traits; psychological well-being; individual attributes; goal pursuit	BIG-5 PERSONALITY-TRAITS; LIFE-SPAN; CAREER SUCCESS; ENTREPRENEURIAL EXIT; GOAL ADJUSTMENT; PERFORMANCE; DIMENSIONS; MODELS; METAANALYSIS; MOTIVATION	5	There is evidence that individual attributes play an important role in self-employment entrance decisions. Drawing on the personality, psychological well-being, and goal attainment literature, the authors ask, What individual attributes are associated with persistence in self-employment? First, they theoretically develop the concept of self-employment persistence and then empirically assess the e…	[Patel, Pankaj C.] Ball State Univ, Muncie, IN 47306 USA; [Thatcher, Sherry M. B.] Univ Louisville, Louisville, KY 40292 USA	Thatcher, SMB (corresponding author), Univ Louisville, Coll Business, Dept Management & Entrepreneurship, Louisville, KY 40292 USA.	smthat01@louisville.edu	Thatcher, Sherry/AAG-3652-2020		National Institute on AgingUnited States Department of Health & Human ServicesNational Institutes of Health (NIH) - USANIH National Institute on Aging (NIA) [AG-9775, AG-21079, AG-033285]; Vilas Estate Trust; National Science FoundationNational Science Foundation (NSF); Spencer Foundation; Graduate School of the University of Wisconsin-Madison	This research uses data from the Wisconsin Longitudinal Study (WLS) of the University of Wisconsin-Madison. Since 1991, the WLS has been supported principally by the National Institute on Aging (AG-9775, AG-21079, and AG-033285), with additional support from the Vilas Estate Trust, the National Science Foundation, the Spencer Foundation, and the Graduate School of the University of Wisconsin-Madi…	Abbott RA, 2008, SOC PSYCH PSYCH EPID, V43, P679, DOI 10.1007/s00127-008-0355-8; Abbring JH, 2003, ECONOMETRICA, V71, P1491, DOI 10.1111/1468-0262.00456; Aldrich HE, 2003, J BUS VENTURING, V18, P573, DOI 10.1016/S0883-9026(03)00011-9; Allen W.D., 2000, J SOCIO-ECON, V29, P487, DOI DOI 10.1016/S1053-5357(00)00086-X; AMIT R, 1995, J BUS VENTURING, V10, P95, DOI 10.1016/0883-9026(94)00017-O; ARGYLE …	216	27	28	1	99	SAGE PUBLICATIONS INC	THOUSAND OAKS	2455 TELLER RD, THOUSAND OAKS, CA 91320 USA	0149-2063	1557-1211		J MANAGE	J. Manag.	NOV	2014	40	7
J	Wahlqvist, ML; Keatinge, JDH; Butler, CD; Friel, S; McKay, J; Easdown, W; Kuo, KN; Huang, CJ; Pan, WH; Yang, RY; Lee, MS; Chang, HY; Chiu, YW; Jaron, D; Krawinkel, M; Barlow, S; Walsh, G; Chiang, TL; Huang, PC; Li, D				Wahlqvist, Mark L.; Keatinge, John Donough H.; Butler, Colin D.; Friel, Sharon; McKay, John; Easdown, Warwick; Kuo, Ken N.; Huang, Ching-jang; Pan, Wen-Harn; Yang, Ray-Yu; Lee, Meei-Shyuan; Chang, Hsing-Yi; Chiu, Ya-Wen; Jaron, Dov; Krawinkel, Michael; Barlow, Snow; Walsh, Greg; Chiang, Tung-liang; Huang, Po-Chao; Li, Duo		FIHS Roundtable Participants	A Food in Health Security (FIHS) platform in the Asia-Pacific Region: the way forward	ASIA PACIFIC JOURNAL OF CLINICAL NUTRITION			English	Article						human security; planetary health; agriculture; social determinants; ethics; systems; network	NUTRITION; INSECURITY; POLICY		The advent of multiple global crises, especially those of climate change, economics, energy, water, food and health evident in 2008, is of considerable moment to those who are suffering their consequences and for those with responsibility and interest in the systems affected. A coalition of parties in the Asia Pacific Region who work in the food and health systems met in August, 2009 in Taiwan an…	[Wahlqvist, Mark L.; Kuo, Ken N.; Chang, Hsing-Yi; Chiu, Ya-Wen] Natl Hlth Res Inst, Inst Populat Hlth Sci, Div Hlth Policy Res & Dev, Zhunan, Taiwan; [Keatinge, John Donough H.; Easdown, Warwick; Yang, Ray-Yu] AVRDC World Vegetable Ctr, Tainan, Taiwan; [Butler, Colin D.; Friel, Sharon] Australian Natl Univ, Natl Ctr Epidemiol & Populat Hlth, Canberra, ACT, Australia; [McKay, John] Study Ctr, Aus…	Wahlqvist, ML (corresponding author), Natl Hlth Res Inst, Inst Populat Hlth Sci, Div Hlth Policy Res & Dev, 35 Keyan Rd, Zhunan, Taiwan.	profmlw@nhri.org.tw	Chiang, Po-Huang/E-3996-2010; Pan, Wen-Harn/F-9972-2010; Chen, Li-Kwang/E-3934-2010; Hsiao, Wei-Hung/B-9931-2013; Krawinkel, Michael/J-7916-2019; Chang, Hsing-Yi/E-3973-2010; Butler, Colin D./H-2267-2019; Kuo, Ken-Nan/E-3845-2010; Huang, Ching-jang/D-1613-2012; Chiu, Ya-Wen/E-3838-2010; Wahlqvist, Mark Lawrence/E-8800-2010; Li, Duo/N-3682-2013	Pan, Wen-Harn/0000-0001-9136-0658; Butler, Colin D./0000-0002-2942-5294; Huang, Ching-jang/0000-0003-1290-9492; Li, Duo/0000-0001-5227-5565; Friel, Sharon/0000-0002-8345-5435; CHIANG, TUNG-LIANG/0000-0002-7876-3943; HUANG, PO-CHAO/0000-0002-0678-8025; Chiu, Tina H. T./0000-0002-1773-1104; Krawinkel, Michael/0000-0001-5801-4876			Arrow K, 2004, J ECON PERSPECT, V18, P147, DOI 10.1257/0895330042162377; Atwood Margaret, 2008, PAYBACK DEBT SHADOW; BERLINGUER G, 2003, REPORT IBC POSSIBILI; Butler CD, 2009, ASIA PAC J CLIN NUTR, V18, P590; Butler CD, 2009, ASIA PAC J CLIN NUTR, V18, P577; CAMPBELL CC, 1991, J NUTR, V121, P408; Carlsson-Kanyama A, 2009, AM J CLIN NUTR, V89, pS1704, DOI 10.3945/ajcn.2009.26736AA; Chen SC, 2009, …	66	27	28	1	26	H E C PRESS, HEALTHY EATING CLUB PTY LTD	MCKINNON	PO BOX 4121, MCKINNON, VIC 3204, AUSTRALIA	0964-7058	1440-6047		ASIA PAC J CLIN NUTR	Asia Pac. J. Clin. Nutr.		2009	18	4
J	Dimitri, C; Oberholtzer, L; Pressman, A				Dimitri, Carolyn; Oberholtzer, Lydia; Pressman, Andy			Urban agriculture: connecting producers with consumers	BRITISH FOOD JOURNAL			English	Article						Economics; Social entrepreneurship; Food security; Community building; Urban agriculture	FOOD SECURITY; FARM; NEIGHBORHOOD; FUTURE		Purpose - Urban farming is becoming more common in the USA, as food-based entrepreneurs seek to make money farming in the city. Yet many urban farms are concerned with other factors in addition to food production, and thus have incorporated social goals into their missions. The purpose of this paper is to identify the social missions of urban farms in the USA, their extent, and explores differenc…	[Dimitri, Carolyn] New York Univ, Dept Nutr Food Studies & Publ Hlth, New York, NY USA; [Oberholtzer, Lydia] Penn State Univ, University Pk, PA 16802 USA; [Pressman, Andy] NCAT ATTRA, Butte, MT USA	Dimitri, C (corresponding author), New York Univ, Dept Nutr Food Studies & Publ Hlth, New York, NY USA.	carolyn.dimitri@nyu.edu			National Institute of Food and Agriculture, Agriculture and Food Research InitiativeUnited States Department of Agriculture (USDA)National Institute of Food and Agriculture [2012-68006-30177]	Funding for this research was provided by the National Institute of Food and Agriculture, Award 2012-68006-30177, Agriculture and Food Research Initiative. Small and Medium Sized Farms Program.	Altieri MA, 1999, AGR ECOSYST ENVIRON, V74, P19, DOI 10.1016/S0167-8809(99)00028-6; Angotti T, 2015, PUBLIC HEALTH, V129, P336, DOI 10.1016/j.puhe.2014.12.008; ATTRA, 2009, EXT GROW SEAS; Bentley Amy, 1998, EATING VICTORY FOOD; Bradley K, 2014, LOCAL ENVIRON, V19, P172, DOI 10.1080/13549839.2013.790350; Brown KH, 2003, URBAN AGR COMMUNITY; Chicago Food Policy Advisory Council, 2006, WORK POL REC …	56	26	26	3	47	EMERALD GROUP PUBLISHING LTD	BINGLEY	HOWARD HOUSE, WAGON LANE, BINGLEY BD16 1WA, W YORKSHIRE, ENGLAND	0007-070X	1758-4108		BRIT FOOD J	Br. Food J.		2016	118	3
J	Zhang, PY; Wang, DYD; Owen, CL				Zhang, Pingying; Wang, Dongyuan D.; Owen, Crystal L.			A Study of Entrepreneurial Intention of University Students	ENTREPRENEURSHIP RESEARCH JOURNAL			English	Article						entrepreneurial intention; the theory of planned behavior; risk preference; psychological well-being	MEDIATING ROLE; SELF-EFFICACY; RISK; DETERMINANTS; PERCEPTIONS; PERSONALITY; ATTITUDES; DECISION; BEHAVIOR; MODEL		Studying entrepreneurial intention has long been an important topic in the field of entrepreneurship. In this paper, we investigate entrepreneurial intention by applying the theory of planned behavior by Ajzen (1991. "The Theory of Planned Behavior." Organizational Behavior and Human Decision Processes 50(2): 179-211), which describes that intention of a behavior depends on attitude, social norm,…	[Zhang, Pingying; Owen, Crystal L.] Univ N Florida, Dept Management, Jacksonville, FL 32224 USA; [Wang, Dongyuan D.] Univ N Florida, Dept Psychol, Jacksonville, FL USA	Zhang, PY (corresponding author), Univ N Florida, Dept Management, Jacksonville, FL 32224 USA.	pingying.zhang@unf.edu; dwang@unf.edu; cowen@unf.edu					AJZEN I, 1987, ADV EXP SOC PSYCHOL, V20, P1, DOI 10.1016/S0065-2601(08)60411-6; AJZEN I, 1991, ORGAN BEHAV HUM DEC, V50, P179, DOI 10.1016/0749-5978(91)90020-T; Ajzen I., 1980, UNDERSTANDING ATTITU; ALDWIN CM, 1987, J PERS SOC PSYCHOL, V53, P337, DOI 10.1037/0022-3514.53.2.337; BENTLER PM, 1990, PSYCHOL BULL, V107, P238, DOI 10.1037/0033-2909.88.3.588; BIRD B, 1988, ACAD MANAGE REV, V13, P442, DO…	53	26	29	6	45	WALTER DE GRUYTER GMBH	BERLIN	GENTHINER STRASSE 13, D-10785 BERLIN, GERMANY	2194-6175	2157-5665		ENTREP RES J	Entrep. Res. J.	JAN	2015	5	1
J	Jimenez, A; Zheng, YQ				Jimenez, Andrea; Zheng, Yingqin			Tech hubs, innovation and development	INFORMATION TECHNOLOGY FOR DEVELOPMENT			English	Article						Innovation; development; tech hubs; capability approach	INCLUSIVE GROWTH; USER ACCEPTANCE; ENTREPRENEURSHIP; INFORMATION; TECHNOLOGY; KNOWLEDGE; FRAMEWORK; SYSTEMS; COMMUNITY; MARKETS		This paper critically discusses of the relationship between innovation and development by presenting a case of a Technology and Innovation Hub. It draws upon the capability approach by Amartya Sen to understand the implications of tech hubs in development. We argue that tech hubs, as collaborative spaces, may contribute to human-centered development processes in ways not directly linked to employ…	[Jimenez, Andrea; Zheng, Yingqin] Royal Holloway Univ London, Sch Management, Egham TW20 0EX, Surrey, England	Jimenez, A (corresponding author), Royal Holloway Univ London, Sch Management, Egham TW20 0EX, Surrey, England.	jimcis.andrea@gmail.com		Jimenez, Andrea/0000-0002-2166-8574	Royal Holloway University of London, UK	This research was carried out with the aid of a full PhD Scholarship from Royal Holloway University of London, UK.	Acs Z. J., 2008, SMALL BUSINESS EC; Agarwal R, 1998, INFORM SYST RES, V9, P204, DOI 10.1287/isre.9.2.204; Agnete Alsos G., 2013, INT J GENDER ENTREPR, V5, P236, DOI 10.1108/IJGE-06-2013-0049; Akrich M., 2002, INT J INNOV MANAG, V6, P187, DOI DOI 10.1142/S1363919602000550; Altan-Olcay O, 2014, FEM ECON, V20, P235, DOI 10.1080/13545701.2014.950978; Altenburg T, 2009, HANDBOOK OF INNOVATION SYSTEMS …	85	25	25	1	14	ROUTLEDGE JOURNALS, TAYLOR & FRANCIS LTD	ABINGDON	2-4 PARK SQUARE, MILTON PARK, ABINGDON OX14 4RN, OXON, ENGLAND	0268-1102	1554-0170		INFORM TECHNOL DEV	Inform. Technol. Dev.		2018	24	1
J	Shams, SMR; Kaufmann, HR				Shams, S. M. Riad; Kaufmann, Hans Ruediger			Entrepreneurial co-creation: a research vision to be materialised	MANAGEMENT DECISION			English	Article						Entrepreneurship; Value co-creation; Stakeholder relationship management	INTERNATIONAL ENTREPRENEURSHIP; MICROFINANCE; KNOWLEDGE; NETWORK; INNOVATIVENESS; ORIENTATIONS; PERSPECTIVE; EXPERIENCES; COMPETENCE; PROPENSITY		Purpose - There are increasing influences of stakeholder relationships in the contemporary entrepreneurial knowledge stream to co-create value, in order to jointly confront the market competition. However, current research implies a dichotomy to exist between the awareness of the necessity of stakeholder-centred strategic thinking and the actual implementation of strategies in entrepreneurial pra…	[Shams, S. M. Riad] Univ Newcastle, Newcastle Business Sch, Callaghan, NSW, Australia; [Kaufmann, Hans Ruediger] Univ Nicosia, Dept Management, Nicosia, Cyprus; [Kaufmann, Hans Ruediger] Univ Nicosia, MIS, Nicosia, Cyprus	Shams, SMR (corresponding author), Univ Newcastle, Newcastle Business Sch, Callaghan, NSW, Australia.	S.MRiad.Shams@uon.edu.au		Shams, S. M. Riad/0000-0001-8007-7400			Aarikka-Stenroos L, 2012, IND MARKET MANAG, V41, P15, DOI 10.1016/j.indmarman.2011.11.008; Acs ZJ, 2013, SMALL BUS ECON, V41, P757, DOI 10.1007/s11187-013-9505-9; Al-Aali A, 2014, ENTREP THEORY PRACT, V38, P95, DOI 10.1111/etap.12077; Alegre J, 2015, TOURISM MANAGE, V46, P375, DOI 10.1016/j.tourman.2014.07.016; [Anonymous], 2013, NATURE, V493, P133; [Anonymous], 2014, FINANCIAL TIMES; Asanuma D, …	108	25	25	2	41	EMERALD GROUP PUBLISHING LTD	BINGLEY	HOWARD HOUSE, WAGON LANE, BINGLEY BD16 1WA, W YORKSHIRE, ENGLAND	0025-1747	1758-6070		MANAGE DECIS	Manag. Decis.		2016	54	6
J	Bleys, B; Whitby, A				Bleys, Brent; Whitby, Alistair			Barriers and opportunities for alternative measures of economic welfare	ECOLOGICAL ECONOMICS			English	Article						ISEW; Index of Sustainable Economic Welfare; NWI; National Welfare Index; GPI; Genuine Progress Indicator; Economic Welfare; Beyond GDP; Barrier study	GENUINE PROGRESS INDICATOR; ISEW; INDEX; GPI; GROWTH; SUSTAINABILITY; STATE; GDP		This paper explores a number of barriers and opportunities facing alternative measures of economic welfare by conducting semi-structured in-depth interviews with (potential) users in both Belgium and Germany. The barriers that they identified are grouped into three categories. Context factors are embedded in the policy context and agendas that shape the environment in which an indicator percolate…	[Bleys, Brent] Univ Ghent, Fac Econ & Business Adm, Dept Gen Econ, B-9000 Ghent, Belgium; [Whitby, Alistair] World Future Council, London SW1Y 5NQ, England	Bleys, B (corresponding author), Univ Ghent, Fac Econ & Business Adm, Dept Gen Econ, Tweekerkenstr 2, B-9000 Ghent, Belgium.	Brent.Bleys@UGent.be; Alistair.Whitby@worldfuturecouncil.org		Bleys, Brent/0000-0003-4010-4149	collaborative project BRAINPOoL - European Commission under the FP7 programme [283024]; Flemish Environment Agency (VMM) in the framework of Flanders Environmental Reporting (MIRA) [MIRA/2014/005]	The German case study was supported by the collaborative project BRAINPOoL funded by the European Commission under the FP7 programme (Contract number 283024), while the Flemish case study was ordered and financed by the Flemish Environment Agency (VMM) in the framework of Flanders Environmental Reporting (MIRA - MIRA/2014/005). The authors would like to express their gratitude towards all other p…	Anielski M, 2009, EDMONTON 2008 GENUIN; Bagstad Kenneth J, 2007, International Journal of Environment, Workplace, and Employment, V3, P132, DOI 10.1504/IJEWE.2007.017880; Bagstad KJ, 2014, ECOL INDIC, V45, P474, DOI 10.1016/j.ecolind.2014.05.005; Bagstad KJ, 2012, ECOL INDIC, V18, P330, DOI 10.1016/j.ecolind.2011.11.026; Beca P, 2014, ECOL INDIC, V46, P167, DOI 10.1016/j.ecolind.2014.06.010; Beri…	76	25	25	0	45	ELSEVIER	AMSTERDAM	RADARWEG 29, 1043 NX AMSTERDAM, NETHERLANDS	0921-8009	1873-6106		ECOL ECON	Ecol. Econ.	SEP	2015	117
J	Morris, TL; Laipple, JS				Morris, Tracy L.; Laipple, Joseph S.			How prepared are academic administrators? Leadership and job satisfaction within US research universities	JOURNAL OF HIGHER EDUCATION POLICY AND MANAGEMENT			English	Article						leadership; academic administration; job satisfaction; development	GENDER		A national sample of 1515 university administrators (academic deans, directors, associate deans, and department chairs) completed a survey of leadership skills, preparedness for administrative role, and job satisfaction. Overall, participants felt least well prepared in the areas of developing entrepreneurial revenue, developing metrics to document progress, and handling grievances and appeals. L…	[Morris, Tracy L.] W Virginia Univ, Dept Psychol, Morgantown, WV 26506 USA; [Laipple, Joseph S.] Kintla, San Francisco, CA USA	Morris, TL (corresponding author), W Virginia Univ, Dept Psychol, Morgantown, WV 26506 USA.	tracy.morris@mail.wvu.edu	Morris, Tracy L/B-4275-2009	Morris, Tracy L/0000-0002-4257-7989			American Association of University Women, 2013, SIMPL TRUTH GEND PAY; Carroll J. B, 2004, NEW DIRECTIONS HIGHE, V126, P3, DOI [DOI 10.1002/HE.144, 10.1002/he.144]; Conger JA, 2003, HARVARD BUS REV, V81, P76; Curtis J. W., 2014, ACADEME, P4; Eagly AH, 2007, PSYCHOL WOMEN QUART, V31, P1, DOI 10.1111/j.1471-6402.2007.00326.x; Favero M.D., 2006, HIGHER ED RES DEV, V25, P277, DOI [10.1080/072943606007…	28	25	25	3	30	ROUTLEDGE JOURNALS, TAYLOR & FRANCIS LTD	ABINGDON	2-4 PARK SQUARE, MILTON PARK, ABINGDON OX14 4RN, OXON, ENGLAND	1360-080X	1469-9508		J HIGH EDUC POLICY M	J. High. Educ. Policy Manag.	38047	2015	37	2
J	Jennings, JE; Breitkreuz, RS; James, AE				Jennings, Jennifer E.; Breitkreuz, Rhonda S.; James, Albert E.			When Family Members Are Also Business Owners: Is Entrepreneurship Good for Families?	FAMILY RELATIONS			English	Article						business ownership; entrepreneurship; family business; family well-being	WORK; CONFLICT; MARRIAGE; WOMEN; STRATEGIES; INTERFACE; DEMANDS; BALANCE; COUPLES; WEALTH		This article represents a call to family scholars for help in examining the effects of business ownership on families. To demonstrate the importance of this call, we illustrate the extent to which new venture creation is encouraged by policymakers and estimate the number of families engaged in entrepreneurial activity around the globe. We then summarize emergent critiques questioning the glorific…	[Jennings, Jennifer E.] Univ Alberta, Sch Business, Dept Strateg Management & Org, Edmonton, AB T6G 2R6, Canada; [Breitkreuz, Rhonda S.] Univ Alberta, Dept Human Ecol, Edmonton, AB T6G 2R6, Canada; [James, Albert E.] Univ Alberta, Edmonton, AB T6G 2R6, Canada	Jennings, JE (corresponding author), Univ Alberta, Sch Business, Dept Strateg Management & Org, Edmonton, AB T6G 2R6, Canada.	jennifer.jennings@ualberta.ca	Jennings, Jennifer/AAK-7074-2020; James, Albert/R-6388-2018	Jennings, Jennifer/0000-0003-0371-8993; James, Albert/0000-0002-9622-9234			Aldrich HE, 1998, RES SOC STR, V16, P291; Aldrich HE, 2003, J BUS VENTURING, V18, P573, DOI 10.1016/S0883-9026(03)00011-9; Aldrich HE, 2011, ENTREP RES J, V1, DOI 10.2202/2157-5665.1024; Ames BD, 2006, FAM RELAT, V55, P119, DOI 10.1111/j.1741-3729.2006.00361.x; BAINES S, 1998, INT SMALL BUS J, V17, P16, DOI DOI 10.1177/0266242698171001; Baines S., 2003, RIDING ROLLER COASTE; BALLARDREISCH DS, 199…	77	25	26	0	48	WILEY	HOBOKEN	111 RIVER ST, HOBOKEN 07030-5774, NJ USA	0197-6664	1741-3729		FAM RELAT	Fam. Relat.	JUL	2013	62	3
J	Burt, RS; Bian, YJ; Opper, S				Burt, Ronald S.; Bian, Yanjie; Opper, Sonja			More or less guanxi: Trust is 60% network context, 10% individual difference	SOCIAL NETWORKS			English	Article						Trust; Guanxi; Network closure; Entrepreneurs; Social isolation	GENERAL SOCIAL SURVEY; CHINESE GUANXI; ENTREPRENEURS; EMBEDDEDNESS; PERFORMANCE; FIRMS; TIES	4, 12	The strong ties known in China as guanxi can be distinguished by a high level of trust relatively independent of the surrounding social structure. Using network data from a stratified probability sample of 700 entrepreneurs citing 4664 contacts, we study guanxi relative to other relations to learn how much individual differences such as well-being, business differences, political participation an…	[Burt, Ronald S.] Univ Chicago, Booth Sch Business, Chicago, IL 60637 USA; [Bian, Yanjie] Xi An Jiao Tong Univ, Dept Sociol, Xian, Shaanxi, Peoples R China; [Bian, Yanjie] Univ Minnesota, Minneapolis, MN 55455 USA; [Opper, Sonja] Lund Univ, Dept Econ, Lund, Sweden	Burt, RS (corresponding author), Univ Chicago, Booth Sch Business, Chicago, IL 60637 USA.	ron.burt@chicagobooth.edu; yjbian@mail.xjtu.edu.cn; sonja.opper@nek.lu.se		Opper, Sonja/0000-0001-9181-8323	University of Chicago Booth School of BusinessUniversity of Chicago; Marianne and Marcus Wallenberg Foundation; Jan Wallanders and Tom Hedelius Foundation	Ronald Burt is grateful to the University of Chicago Booth School of Business for financial support during the work reported here. Sonja Opper is grateful to the Marianne and Marcus Wallenberg Foundation for support of this work. We are grateful to the Jan Wallanders and Tom Hedelius Foundation for the grant to Sonja Opper that funded the fieldwork in China providing the data analyzed here. The t…	Alesina A, 2002, J PUBLIC ECON, V85, P207, DOI 10.1016/S0047-2727(01)00084-6; Batjargal B, 2013, ACAD MANAGE J, V56, P1024, DOI 10.5465/amj.2010.0095; Bian YJ, 2014, RES SOCIOL ORGAN-RES, V40, P421, DOI 10.1108/S0733-558X(2014)0000040021; Bian YJ, 2015, SOC NETWORKS, V40, P129, DOI 10.1016/j.socnet.2014.09.003; Bian YJ, 2012, CHINESE SOCIOL REV, V45, P70, DOI 10.2753/CSA2162-0555450104; Bian Yanj…	53	24	24	1	50	ELSEVIER SCIENCE BV	AMSTERDAM	PO BOX 211, 1000 AE AMSTERDAM, NETHERLANDS	0378-8733	1879-2111		SOC NETWORKS	Soc. Networks	JUL	2018	54
J	Saarni, SI; Saarni, ES; Saarni, H				Saarni, S. I.; Saarni, E. S.; Saarni, H.			Quality of life, work ability, and self employment: a population survey of entrepreneurs, farmers, and salary earners	OCCUPATIONAL AND ENVIRONMENTAL MEDICINE			English	Article							UTILITY MEASURES; MENTAL-HEALTH; EQ-5D; 15D; EMPLOYEES; EUROQOL; SAMPLE; STRAIN; INDEX; STATE		Objectives: Self employment is increasing but it is not yet known how its different forms affect health, quality of life, and work ability. We compared the work ability, subjective quality of life (QoL), and health-related quality of life (HRQoL) of entrepreneurs both with and without personnel, farmers, and salaried workers. We investigated which domains of HRQoL are associated with work status.…	[Saarni, S. I.] Natl Publ Hlth Inst, Dept Mental Hlth & Alcohol Res, SF-00300 Helsinki, Finland; [Saarni, E. S.] Univ Turku, Dept Social Policy, Turku, Finland; [Saarni, H.] Finnish Inst Occuopat Hlth, Turku, Finland	Saarni, SI (corresponding author), Natl Publ Hlth Inst, Dept Mental Hlth & Alcohol Res, Mannerheimintie 166, SF-00300 Helsinki, Finland.	saarni@helsinki.fi					Aromaa A, 2004, HLTH FUNCTIONAL CAPA; Austin PC, 2000, QUAL LIFE RES, V9, P901, DOI 10.1023/A:1008938326604; Blair A, 2005, ANN EPIDEMIOL, V15, P279, DOI 10.1016/j.annepidem.2004.08.008; Brooks R, 1996, HEALTH POLICY, V37, P53, DOI 10.1016/0168-8510(96)00822-6; Brouwer WBF, 2005, PHARMACOECONOMICS, V23, P209, DOI 10.2165/00019053-200523030-00002; *COLL STAT, 2003, STAT US GUID REL, V8; Cong R, 20…	42	24	25	1	32	BMJ PUBLISHING GROUP	LONDON	BRITISH MED ASSOC HOUSE, TAVISTOCK SQUARE, LONDON WC1H 9JR, ENGLAND	1351-0711	1470-7926		OCCUP ENVIRON MED	Occup. Environ. Med.	FEB	2008	65	2
J	Kareiva, P; Fuller, E				Kareiva, Peter; Fuller, Emma			Beyond Resilience: How to Better Prepare for the Profound Disruption of the Anthropocene	GLOBAL POLICY			English	Article							CLIMATE-CHANGE; EVOLUTION		Human activity is dramatically shaping all of Earth's natural systems, producing unprecedented challenges for people and nature. Climate disruption, altered hydrology, and ecosystem degradation reflect both threats to human wellbeing and changes in the rules of the game' that make management difficult. While ecologists, conservationists and environmental scientists clamor for radical action to re…	[Kareiva, Peter] Univ Calif Los Angeles, Inst Environm & Sustainabil, Los Angeles, CA USA; [Fuller, Emma] Princeton Univ, Ecol & Evolutionary Biol, Princeton, NJ 08544 USA	Kareiva, P (corresponding author), Univ Calif Los Angeles, Inst Environm & Sustainabil, Los Angeles, CA USA.						Archie KM, 2012, ECOL SOC, V17, DOI 10.5751/ES-05187-170420; Armsworth PR, 2015, FRONT ECOL ENVIRON, V13, P163, DOI 10.1890/130352; Back T, 1993, EVOL COMPUT, V1, P1, DOI 10.1162/evco.1993.1.1.1; Blank S., 2015, FORBES; Blank S., 2013, HARVARD BUSINESS REV; Butler WH, 2010, ECOL SOC, V15; Donihue CM, 2015, AMBIO, V44, P194, DOI 10.1007/s13280-014-0547-2; Ellis EC, 2011, PHILOS T R SOC A, V369, P1…	44	23	24	1	43	WILEY	HOBOKEN	111 RIVER ST, HOBOKEN 07030-5774, NJ USA	1758-5880	1758-5899		GLOB POLICY	Glob. Policy	MAY	2016	7			1
J	Welsh, DHB; Memili, E; Kaciak, E				Welsh, Dianne H. B.; Memili, Esra; Kaciak, Eugene			An empirical analysis of the impact of family moral support on Turkish women entrepreneurs	JOURNAL OF INNOVATION & KNOWLEDGE			English	Article						Women entrepreneurs; Turkey; Family moral support; Entrepreneurship challenges and; opportunities	GENDER; TURKEY; PARTICIPATION; PERCEPTIONS; INTENTIONS	2	It is well documented that women entrepreneurs add exponential growth to the economic well-being of countries. The impact of family moral support on Turkish women entrepreneurs' is examined including major challenges (i.e. personal problems and recognition of poor managerial skills and knowledge) and advantages (i.e. perceptions of helpfulness of education and work experience). Our findings show …	[Welsh, Dianne H. B.; Memili, Esra] Univ N Carolina, Bryan Sch Business & Econ 441, 516 Stirling St, Greensboro, NC 27402 USA; [Kaciak, Eugene] Brock Univ, Goodman Sch Business, St Catharines, ON, Canada; [Kaciak, Eugene] Kozminski Univ, Warsaw, Poland	Welsh, DHB (corresponding author), Univ N Carolina, Bryan Sch Business & Econ 441, 516 Stirling St, Greensboro, NC 27402 USA.	dhwelsh@uncg.edu	Kaciak, Eugene/AAB-7926-2020	Kaciak, Eugene/0000-0002-7089-0729			Baycan Levent T., 2003, INT J SOC ECON, V30, P1131, DOI DOI 10.1108/03068290310497495; BECKER TE, 1993, J MANAGE, V19, P663, DOI 10.1016/0149-2063(93)90010-K; Bullough A, 2012, LEADERSHIP QUART, V23, P398, DOI 10.1016/j.leaqua.2011.09.010; Carter N. M., 2003, NEW PERSPECTIVES WOM, P25; Celebi N., 1993, BAIMSIZ ISYERI SAHIB; Central Intelligence Agency, 2012, TURK CIA WORLD FACT; Cetindamar D., 20…	39	22	22	1	21	ELSEVIER ESPANA	MADRID	CALLE DE ZURBANO, 76-4TH FLR LEFT, MADRID, 28010, SPAIN	2530-7614	2444-569X		J INNOV KNOWL	J. Innov. Knowl.	JAN-APR	2016	1	1
J	Sastre-Castillo, MA; Peris-Ortiz, M; Danvila-Del Valle, I				Sastre-Castillo, Miguel A.; Peris-Ortiz, Marta; Danvila-Del Valle, Ignacio			What Is Different about the Profile of the Social Entrepreneur?	NONPROFIT MANAGEMENT & LEADERSHIP			English	Article						social entrepreneur; values; entrepreneurship	ENTERPRISE; VALUES; PERCEPTIONS; PERSONALITY; EDUCATION; WOMEN; MEN		In recent years, the term social entrepreneur has become increasingly common in academic and business circles. Social entrepreneurs engage in a variety of activities, but always with the intention of solving social problems. Social entrepreneurs are not merely people who perform acts of charity; they have an evident desire to improve social well-being and develop projects with long-term vision. T…	[Sastre-Castillo, Miguel A.; Danvila-Del Valle, Ignacio] Univ Complutense Madrid, Dept Business Adm, Madrid 28223, Spain; [Sastre-Castillo, Miguel A.] Autonomous Technol Inst Mexico ITAM, Mexico City, DF, Mexico; [Peris-Ortiz, Marta] Univ Politecn Valencia, Dept Business Adm, E-46022 Valencia, Spain	Danvila-Del Valle, I (corresponding author), Univ Complutense Madrid, Fac CC Econ, Campus Somosaguas, Madrid 28223, Spain.	idanvila@ucm.es	Castillo, Miguel Angel Sastre/AAE-3047-2019	Sastre Castillo, Miguel Angel/0000-0003-0163-5692	Jack, Joseph and Morton Mandel School of Applied Social Sciences, Case Western Reserve University	Journal sponsored by the Jack, Joseph and Morton Mandel School of Applied Social Sciences, Case Western Reserve University.	AJZEN I, 1991, ORGAN BEHAV HUM DEC, V50, P179, DOI 10.1016/0749-5978(91)90020-T; Antoncic B, 2001, J BUS VENTURING, V16, P495, DOI 10.1016/S0883-9026(99)00054-3; Arciniega L., 2000, REV PSICOLOGIA SOCIA, V15, P281, DOI DOI 10.1174/021347400760259712; Austin J, 2006, ENTREP THEORY PRACT, V30, P1, DOI 10.1111/j.1540-6520.2006.00107.x; Baron RA, 2001, J APPL PSYCHOL, V86, P923, DOI 10.1037/0021-9010…	70	22	24	3	112	WILEY PERIODICALS, INC	SAN FRANCISCO	ONE MONTGOMERY ST, SUITE 1200, SAN FRANCISCO, CA 94104 USA	1048-6682	1542-7854		NONPROFIT MANAG LEAD	Nonprofit Manag. Leadersh.	SUM	2015	25	4
J	Warnecke, T				Warnecke, Tonia			Entrepreneurship and Gender: An Institutional Perspective	JOURNAL OF ECONOMIC ISSUES			English	Article						development; entrepreneurship; gender; institutional economics; informal labor			Institutional economics has long shown that entrepreneurship plays a critical role in the pursuit of economic development and wellbeing. At the same time, entrepreneurship is complex and evolving. The path between entrepreneurship and wellbeing is not clear-cut, and not all types of entrepreneurial activity are correlated with economic growth. Failure to acknowledge this heterogeneity has importa…	[Warnecke, Tonia] Rollins Coll, Winter Pk, FL 32789 USA; [Warnecke, Tonia] Rollins Coll, China Ctr, Winter Pk, FL 32789 USA	Warnecke, T (corresponding author), Rollins Coll, Winter Pk, FL 32789 USA.						Acs Z.J., 2006, INNOVATIONS TECHNOLO, V1, P97, DOI DOI 10.1162/ITGG.2006.1.1.97; Ahmad N., 2008, DEFINING ENTREPRENEU; American Express OPEN, 2012, STAT WOM OWN BUS REP; Ashoka U and the Algernon Sydney Sullivan Foundation, 2012, CAMP START KIT; Aziz Fahima, 2009, WORKING PAPER; Blanchard Alain, 2010, INT J PLURALISM EC E, V1, P290; Cunningham J.B., 1991, J SMALL BUS MANAGE, V29, P45; De Ruyter A…	31	22	22	0	40	ROUTLEDGE JOURNALS, TAYLOR & FRANCIS LTD	ABINGDON	2-4 PARK SQUARE, MILTON PARK, ABINGDON OX14 4RN, OXON, ENGLAND	0021-3624	1946-326X		J ECON ISSUES	J. Econ. Issues	JUN	2013	47	2
J	Shultz, CJ				Shultz, Clifford J., II			Vietnam: Political Economy, Marketing System	JOURNAL OF MACROMARKETING			English	Article						Vietnam; academic marketing; consumer well-being; corporate citizenship; cross-cultural; developing countries; development; economic development; emerging and transitioning markets; ethics in markets; family decision making		12	Vietnam is an evolving political economy and marketing system. Since the implementation of Doi Moi, the 1986 policy to invoke a shift from central economic planning to a more market-oriented system, the country has made extraordinary progress on several socioeconomic indicators. Some observers contend Vietnam is a development model; others suggest the country still has numerous challenges to over…	Loyola Univ Chicago Mkt, Chicago, IL 60611 USA	Shultz, CJ (corresponding author), Loyola Univ Chicago Mkt, Maguire Hall,1 E Pearson St, Chicago, IL 60611 USA.	cjs2@luc.edu	Thai, Mai T/K-5273-2014; Sayer, Jeffrey/H-5504-2011	Thai, Mai T/0000-0002-6601-7337; Sayer, Jeffrey/0000-0002-4087-0794			[Anonymous], 2011, WORLD FACTB; [Anonymous], 2010, NHAN DAN 1001; Asian Development Bank, 2011, AS DEV BANK VIETN FA; BBC News, 2011, BBC NEWS ASIA P 0605; Central Intelligence Agency, 1992, VIETN MAP SHAD REL; CHEN K, 1987, CHINAS WAR VIETNAM 1; CIMA RJ, 1989, ASIAN SURV, V29, P786, DOI 10.1525/as.1989.29.8.01p0297c; Dapice D, 2008, CHOOSING SUCCESS LES; Dapice David, 1996, VIETNAM WILL IT GET; …	43	22	22	1	27	SAGE PUBLICATIONS INC	THOUSAND OAKS	2455 TELLER RD, THOUSAND OAKS, CA 91320 USA	0276-1467			J MACROMARKETING	J. Macromarketing	MAR	2012	32	1
J	Scanlon, E; Adams, D				Scanlon, Edward; Adams, Deborah			Do Assets Affect Well-Being? Perceptions of Youth in a Matched Savings Program	JOURNAL OF SOCIAL SERVICE RESEARCH			English	Article						Asset-based welfare; youth savings; asset effects; children's savings accounts; savings	HOMEOWNERSHIP; BENEFITS	15	This article presents data from a qualitative study of a youth savings account program. In-depth interviews were conducted with 30 youth ages 14-19 between November 2004 and February 2005 who were participants in the Saving for Education, Entrepreneurship, and Downpayment (SEED) national demonstration project. Our findings focus on youths' perceptions of the psychological, behavioral, and social …	[Scanlon, Edward; Adams, Deborah] Univ Kansas, Sch Social Welf, Lawrence, KS 66044 USA	Scanlon, E (corresponding author), Univ Kansas, Sch Social Welf, Twente Hall,1545 Lilac Lane, Lawrence, KS 66044 USA.	escanlon@ku.edu					Aaronson D, 2000, J URBAN ECON, V47, P356, DOI 10.1006/juec.1999.2144; BEVERLY S, 1999, J SOCIO-ECON, V28, P457, DOI DOI 10.1016/S1053-5357(99)00046-3; BRACHER M, 1993, POP STUD-J DEMOG, V47, P403, DOI 10.1080/0032472031000147216; CARNEY S, 2001, ASSETS POOR BENEFITS; CHERLIN A, 1977, THESIS U CALIFORNIA; CLARK H, 1997, THESIS U TEXAS ARLIN; Domowitz I, 1999, J FINANC, V54, P403, DOI 10.1111/0022…	40	22	22	0	13	ROUTLEDGE JOURNALS, TAYLOR & FRANCIS LTD	ABINGDON	2-4 PARK SQUARE, MILTON PARK, ABINGDON OX14 4RN, OXON, ENGLAND	0148-8376	1540-7314		J SOC SERV RES	J. Soc. Serv. Res.		2009	35	1
J	Pokorny, B; de Jong, W; Godar, J; Pacheco, P; Johnson, J				Pokorny, Benno; de Jong, Wil; Godar, Javier; Pacheco, Pablo; Johnson, James			From large to small: Reorienting rural development policies in response to climate change, food security and poverty	FOREST POLICY AND ECONOMICS			English	Article						Rural development policies; Amazon; Smallholders; Economic growth; Poverty alleviation; Environmental costs	BRAZILIAN AMAZON; FARM SIZE; DEFORESTATION; POPULATION; BIODIVERSITY; OUTCOMES; FUTURE; MODEL		Discourses regarding the development of the Amazon region highlight the importance of the local cultures, local knowledge and participation of smallholders, such as indigenous people, traditional communities and small-scale colonists. Current policies, however, still pursue a development model that is oriented towards global commodity markets and the capacity of well-qualified entrepreneurs with …	[Pokorny, Benno] Univ Freiburg, Fac Environm & Nat Resources, D-79106 Freiburg, Germany; [de Jong, Wil] Kyoto Univ, Ctr Integrated Area Studies, Sakyo Ku, Kyoto 6068501, Japan; [Godar, Javier] SEI, S-10691 Stockholm, Sweden; [Pacheco, Pablo] Ctr Int Forestry Res, Bogor 16000, Indonesia	Pokorny, B (corresponding author), Univ Freiburg, Fac Environm & Nat Resources, Tennenbacherstr 4, D-79106 Freiburg, Germany.	benno.pokorny@waldbau.uni-freiburg.de; wdejong@cias.kyoto-u.ac.jp; javier.godar@sei-international.org; p.pacheco@cgiar.org; johnson_james80@hotmail.com	Pacheco, Pablo/D-9851-2013; Pacheco, Pablo/I-7090-2019	Pacheco, Pablo/0000-0001-7192-6861; Pacheco, Pablo/0000-0001-7192-6861; de Jong, Wil/0000-0002-5652-3375; Pokorny, Benno/0000-0001-6421-8226; Godar, Javier/0000-0002-2603-9777	European CommunityEuropean Community (EC) [INCO-PL 510903]; Governanca de Recursos Naturais por Pequenos Produtores Rurais da Amazonia (Acronym GOL) [EuropeAid 128-046/L/ACT/BR, DCI-NSAPVD/2010/208-221]; Japan Society for the Promotion of Science (JSPS)Ministry of Education, Culture, Sports, Science and Technology, Japan (MEXT)Japan Society for the Promotion of Science; JSPSMinistry of Education,…	Several activities leading to this paper were supported by the European Community' through its projects: Forest management by small farmers in the Amazon - An opportunity to enhance forest ecosystem stability and rural livelihood (Acronym ForLive, INCO-PL 510903) and Governanca de Recursos Naturais por Pequenos Produtores Rurais da Amazonia (Acronym GOL, EuropeAid 128-046/L/ACT/BR, DCI-NSAPVD/201…	Aghon G., 2001, DESARROLLO EC LOCAL; Alburquerque F., 2001, EVALUACION REFLEXION; Alston LJ, 2000, J ENVIRON ECON MANAG, V39, P162, DOI 10.1006/jeem.1999.1103; Altenburg T, 1999, WORLD DEV, V27, P1693, DOI 10.1016/S0305-750X(99)00081-9; Altieri MA, 2012, AGRON SUSTAIN DEV, V32, P1, DOI 10.1007/s13593-011-0065-6; America Economia, 2012, RANK MULT 2011; Angelsen A., 2001, AGR TECHNOLOGIES TRO; [Ano…	137	21	22	1	78	ELSEVIER	AMSTERDAM	RADARWEG 29, 1043 NX AMSTERDAM, NETHERLANDS	1389-9341	1872-7050		FOREST POLICY ECON	Forest Policy Econ.	NOV	2013	36
J	Adams, G; Estrada-Villalta, S; Sullivan, D; Markus, HR				Adams, Glenn; Estrada-Villalta, Sara; Sullivan, Daniel; Markus, Hazel Rose			The Psychology of Neoliberalism and the Neoliberalism of Psychology	JOURNAL OF SOCIAL ISSUES			English	Article							POSITIVE PSYCHOLOGY; CREATIVE MALADJUSTMENT; RACIAL-DISCRIMINATION; STIGMA CONSCIOUSNESS; CULTURE; CHOICE; EMPOWERMENT; PERSONALITY; SENSITIVITY; REJECTION	15	In this article, we approach the relationship between neoliberalism and psychological science from the theoretical perspective of cultural psychology. In the first section, we trace how engagement with neoliberal systems results in characteristic tendencies-including a radical abstraction of self from social and material context, an entrepreneurial understanding of self as an ongoing development …	[Adams, Glenn] Univ Kansas, Psychol, Lawrence, KS 66045 USA; [Estrada-Villalta, Sara] Univ Kansas, Dept Psychol, 1415 Jayhawk Blvd, Lawrence, KS 66045 USA; [Sullivan, Daniel] Univ Arizona, Psychol, Tucson, AZ 85721 USA; [Markus, Hazel Rose] Stanford Univ, Behav Sci, Stanford, CA 94305 USA	Adams, G (corresponding author), Univ Kansas, Dept Psychol, 1415 Jayhawk Blvd, Lawrence, KS 66045 USA.	adamsg@ku.edu	Estrada-Villalta, Sara/AAU-2936-2020	Adams, Glenn/0000-0002-9487-6999	Jack Brehm Fund for Basic Research in Social Psychology	The Cultural Psychology Research Group at the University of Kansas offered valuable feedback on an initial draft of the article. The Jack Brehm Fund for Basic Research in Social Psychology provided support for the project.	Adams G, 2004, HANDBOOK OF CLOSENESS AND INTIMACY, P321; Adams G, 2004, PSYCHOLOGICAL FOUNDATIONS OF CULTURE, P335; Adams G., 2019, SEEING RACE AGAIN CO, P271; ADAMS G, 2015, J SOCIAL POLITICAL P, V3, P213, DOI DOI 10.5964/JSPP.V3I1.564; Adams G, 2008, COMMEMORATING BROWN, P215, DOI DOI 10.1037/11681-012; Adams G., 2012, RELATIONSHIP SCI INT, P49, DOI DOI 10.1037/13489-003; Adams G., 2018, OXFORD…	140	20	19	3	7	WILEY	HOBOKEN	111 RIVER ST, HOBOKEN 07030-5774, NJ USA	0022-4537	1540-4560		J SOC ISSUES	J. Soc. Issues	MAR	2019	75	1
J	Annink, A; Gorgievski, M; Den Dulk, L				Annink, Anne; Gorgievski, Marjan; Den Dulk, Laura			Financial hardship and well-being: a cross-national comparison among the European self-employed	EUROPEAN JOURNAL OF WORK AND ORGANIZATIONAL PSYCHOLOGY			English	Article						financial hardship; subjective well-being; self-employed; cross-national; COR theory	ECONOMIC-CRISIS; WELFARE-STATE; CULTURE; HEALTH; FAMILY; WORK; UNEMPLOYMENT; STRESS; CONSERVATION; INSECURITY		Based on data from the 2004 and 2010 European Social Survey, this multidisciplinary and cross-national comparative study investigates the relationship between financial hardship and subjective well-being among 9,755 self-employed individuals from 31 European countries. It also aims to identify potential mitigating factors in this relationship on both the individual and the country level. Multilev…	[Annink, Anne; Den Dulk, Laura] Erasmus Univ, Dept Publ Adm, Burgemeester Oudlaan 50,POB 1738, NL-3000 DR Rotterdam, Netherlands; [Gorgievski, Marjan] Erasmus Univ, Dept Psychol, Rotterdam, Netherlands	Annink, A (corresponding author), Erasmus Univ, Dept Publ Adm, Burgemeester Oudlaan 50,POB 1738, NL-3000 DR Rotterdam, Netherlands.	annink@fsw.eur.nl		Annink, Anne/0000-0002-4212-471X	Netherlands Organization for Scientific ResearchNetherlands Organization for Scientific Research (NWO) [4010002.006]	This study has been funded by the Netherlands Organization for Scientific Research [4010002.006].	Anderson CJ, 2007, EUR J POLIT RES, V46, P211, DOI 10.1111/j.1475-6765.2007.00692.x; Andersson P., 2008, J SOCIO-ECON, V37, P213, DOI DOI 10.1016/J.S0CEC.2007.03.003; Annink A, 2016, SOC INDIC RES, V126, P571, DOI 10.1007/s11205-015-0899-4; [Anonymous], 2011, IMP EC CRIS MENT HLT; Aparicio S, 2016, TECHNOL FORECAST SOC, V102, P45, DOI 10.1016/j.techfore.2015.04.006; Audretsch D., 2010, UNRAVELING…	71	20	20	1	18	ROUTLEDGE JOURNALS, TAYLOR & FRANCIS LTD	ABINGDON	2-4 PARK SQUARE, MILTON PARK, ABINGDON OX14 4RN, OXON, ENGLAND	1359-432X	1464-0643		EUR J WORK ORGAN PSY	Eur. J. Work Organ. Psychol.		2016	25	5
J	Kallioniemi, MK; Simola, A; Kaseva, J; Kymalainen, HR				Kallioniemi, Marja K.; Simola, Ahti; Kaseva, Janne; Kymalainen, Hanna-Riitta			Stress and Burnout Among Finnish Dairy Farmers	JOURNAL OF AGROMEDICINE			English	Article						Agriculture; burnout; dairy farm; stress; survey	WORK	10	Psychosocial risks among farmers have increasingly been examined because of the ongoing changes in agriculture, such as restructuring of the industry, transition from family farming towards entrepreneurship, and climate change. The aims of the study were to determine the stressors, prevalence of stress and burnout, and variables associated with these symptoms among Finnish dairy farmers. In total…	[Kallioniemi, Marja K.] Nat Resources Inst Finland Luke, Econ & Soc, Vakolantie 55, FI-03400 Vihti, Finland; [Simola, Ahti] FIOH, Jyvaskyla, Finland; [Kaseva, Janne] Nat Resources Inst Finland Luke, Nat Resources & Bioprod, Jokioinen, Finland; [Kymalainen, Hanna-Riitta] Univ Helsinki, Dept Agr Sci, Helsinki, Finland	Kallioniemi, MK (corresponding author), Nat Resources Inst Finland Luke, Econ & Soc, Vakolantie 55, FI-03400 Vihti, Finland.	marja.kallioniemi@luke.fi		Kymalainen, Hanna-Riitta/0000-0002-2889-7038	Ministry of Agriculture and Forestry, Farmers' Social Insurance Institution (Mela); MTT Agrifood Research Finland	The study is based on the research project "Improved wellbeing of dairy farmers as a means of enhancing livestock welfare." The financial support from the Ministry of Agriculture and Forestry, Farmers' Social Insurance Institution (Mela), and MTT Agrifood Research Finland is gratefully acknowledged.	Altmets K, 2011, EUR J PUBLIC HEALTH, V21, P49, DOI 10.1093/eurpub/ckp239; [Anonymous], 2007, THESIS; Bakker AB, 2002, ANXIETY STRESS COPIN, V15, P245, DOI 10.1080/1061580021000020716; Booth NJ, 2000, INT J SOC PSYCHIATR, V46, P67, DOI 10.1177/002076400004600108; Brumby Susan, 2011, BMC Res Notes, V4, P89, DOI 10.1186/1756-0500-4-89; Cox T, 2000, RES WORK RELATED STR; Deary IJ, 1997, STRESS MEDIC…	44	20	21	3	34	TAYLOR & FRANCIS INC	PHILADELPHIA	530 WALNUT STREET, STE 850, PHILADELPHIA, PA 19106 USA	1059-924X	1545-0813		J AGROMEDICINE	J. Agromedicine		2016	21	3
J	Sanzo-Perez, MJ; Alvarez-Gonzalez, LI; Rey-Garcia, M				Jose Sanzo-Perez, Maria; Ignacio Alvarez-Gonzalez, Luis; Rey-Garcia, Marta			How to encourage social innovations: a resource-based approach	SERVICE INDUSTRIES JOURNAL			English	Article						social innovation; well-being; dynamic capabilities; transformative services	INTERNAL-MARKET ORIENTATION; TRUST; ENTREPRENEURSHIP; PERFORMANCE; SUCCESS		During the last decade, social innovation has emerged as an outstanding topic for scholars, businesses, and public institutions. This growing interest is due to its potential positive effects on well-being and sustainable development. This study analyzes social innovation under the umbrella of the transformative service research framework. Adopting a resource-based perspective, the research attem…	[Jose Sanzo-Perez, Maria; Ignacio Alvarez-Gonzalez, Luis] Univ Oviedo, Fac Econ & Empresa, Oviedo, Spain; [Rey-Garcia, Marta] Univ A Coruna, Fac Econ & Empresa, La Coruna, Spain	Sanzo-Perez, MJ (corresponding author), Univ Oviedo, Fac Econ & Empresa, Ave Cristo S-N, Oviedo, Spain.	mjsanzo@uniovi.es		Rey-Garcia, Marta/0000-0002-9453-8551	Spanish Ministry of Economy and Competitiveness [MICINN-09-ECO2009-11377]; ITSSOIN project (Impact of the Third Sector as SOcial INnovation); European CommissionEuropean CommissionEuropean Commission Joint Research Centre	The authors acknowledge funding provided by the Spanish Ministry of Economy and Competitiveness, as part of its R&D Plan (2009-2011), for the project entitled 'Foundations as a key factor of Spanish firms' corporate social responsibility strategy. Bi-directional analysis of the foundation-firm relationship following a marketing approach' (MICINN-09-ECO2009-11377). The authors also wish to acknowl…	Ahmed P.K., 2003, EUR J MARKETING, V37, P1177, DOI DOI 10.1108/03090560310498813; Anderson L, 2013, J BUS RES, V66, P1203, DOI 10.1016/j.jbusres.2012.08.013; ARMSTRONG JS, 1977, J MARKETING RES, V14, P396, DOI 10.2307/3150783; Barkensjo A., 2005, VOLUNTAS, V16, P251, DOI DOI 10.1007/S11266-005-7724-0; BARNEY J, 1991, J MANAGE, V17, P99, DOI 10.1177/014920639101700108; Bouchard MJ, 2012, SERV BUS,…	47	20	20	7	150	ROUTLEDGE JOURNALS, TAYLOR & FRANCIS LTD	ABINGDON	2-4 PARK SQUARE, MILTON PARK, ABINGDON OX14 4RN, OXON, ENGLAND	0264-2069	1743-9507		SERV IND J	Serv. Ind. J.	40695	2015	35	44050
J	Smetkowski, M				Smetkowski, Maciej			Regional Disparities in Central and Eastern European Countries: Trends, Drivers and Prospects	EUROPE-ASIA STUDIES			English	Article									Growth in Central and East European countries (CEE) is territorially unbalanced, more so than in most other parts of the EU. The benefits of transformation in these countries have been unequally distributed among particular social groups and territorieswith the emergence of highly educated and internationally successful professionals and entrepreneurs located mainly in metropolitan areas on the o…	Univ Warsaw, Ctr European Reg & Local Studies EUROREG, PL-0927 Warsaw, Poland	Smetkowski, M (corresponding author), Univ Warsaw, Ctr European Reg & Local Studies EUROREG, Krakowskie Przedmiescie Str 30, PL-0927 Warsaw, Poland.	m.smetkowski@uw.edu.pl		Smetkowski, Maciej/0000-0002-3978-192X			Bachtler J., 2002, 10 EC SOC RES COUNC, P10; BACHTLER J, 2000, TRANSITION COHESION; Blazek J., 2010, FINANCIAL CRISIS CEN; Boldrin M., 2001, ECON POLICY, V16, P32; BOURDEAU-LEPAGE L, 2003, METROPOLIZATION CENT; Castells M., 1998, INFORM AGE EC SOC CU; Celiska D., 2010, 5 EUROREG, P5; EC, 2007, 4 EC OFF OFF PUBL EU; EPRC, 2011, 111 EORPA U STRATHCL; ESPON, 2006, PREACC AID IMP AN; Ezcurra R., 2007…	30	20	20	0	24	ROUTLEDGE JOURNALS, TAYLOR & FRANCIS LTD	ABINGDON	4 PARK SQUARE, MILTON PARK, ABINGDON OX14 4RN, OXFORDSHIRE, ENGLAND	0966-8136	1465-3427		EUROPE-ASIA STUD	Eur.-Asia Stud.	37165	2013	65	8
J	Lofstrom, M				Lofstrom, Magnus			Does self-employment increase the economic well-being of low-skilled workers?	SMALL BUSINESS ECONOMICS			English	Article						Self-employment; Entrepreneurship; Low-skill; Women; Immigrants	ENTREPRENEURSHIP; PERFORMANCE; EARNINGS; RETURNS		Low-skilled workers do not fare well in today's skill intensive economy and their opportunities continue to diminish. Utilizing data from the survey of income and program participation, this paper provides an analysis of the economic returns to business ownership among low-skilled workers and addresses the essential question of whether self-employment is a good option for low-skilled individuals …	[Lofstrom, Magnus] Publ Policy Inst Calif, San Francisco, CA 94111 USA; [Lofstrom, Magnus] IZA, San Francisco, CA 94111 USA	Lofstrom, M (corresponding author), Publ Policy Inst Calif, 500 Washington St,Suite 600, San Francisco, CA 94111 USA.	lofstrom@ppic.org					Aguilera MB, 2009, SMALL BUS ECON, V33, P413, DOI 10.1007/s11187-009-9206-6; BORJAS GJ, 1986, J HUM RESOUR, V21, P485, DOI 10.2307/145764; Brock W. A., 1986, EC SMALL BUSINESS; CUMMINGS S, 1980, SELF HELP URBAN AM P; EVANS DS, 1989, AM ECON REV, V79, P519; Fairlie R. W., 2006, HDB ENTREPRENEURSHIP, V2; Fairlie RW, 1996, J HUM RESOUR, V31, P757, DOI 10.2307/146146; Fairlie RW, 2005, SMALL BUS ECON…	23	20	20	2	35	SPRINGER	DORDRECHT	VAN GODEWIJCKSTRAAT 30, 3311 GZ DORDRECHT, NETHERLANDS	0921-898X			SMALL BUS ECON	Small Bus. Econ. Group	MAY	2013	40	4
J	Jinnah, S				Jinnah, Sikina			Marketing Linkages: Secretariat Governance of the Climate-Biodiversity Interface	GLOBAL ENVIRONMENTAL POLITICS			English	Article									In this article I argue that, the Secretariat of the Convention on Biological Diversity (CBD), led by its autonomously entrepreneurial Executive Secretary, influences overlap management by strategically linking biodiversity and climate change issues. Specifically, the Secretariat marketed (filtered, framed, and reiterated) strategic frames of the biodiversity-climate change interface that reframe…	American Univ, Sch Int Serv, Washington, DC 20016 USA	Jinnah, S (corresponding author), American Univ, Sch Int Serv, Washington, DC 20016 USA.		Jinnah, Sikina/AAI-9231-2020	Jinnah, Sikina/0000-0003-4528-3000			Axelrod Mark, I INTERPLAY IN PRESS; Barnett M, 2004, RULES WORLD INT ORG; Biermann F, 2009, MANAGERS OF GLOBAL CHANGE: THE INFLUENCE OF INTERNATIONAL ENVIRONMENTAL BUREAUCRACIES, P1; Cox R. W., 1974, ANATOMY INFLUENCE DE; Dickson David, 2010, MORE RES NEEDED BIOD; Gehring T, 2009, EUR J INT RELAT, V15, P125, DOI 10.1177/1354066108100055; Government of India, 2009, IND 4 NAT REP CONV B; Hawkins DG…	29	20	20	0	13	MIT PRESS	CAMBRIDGE	ONE ROGERS ST, CAMBRIDGE, MA 02142-1209 USA	1526-3800	1536-0091		GLOBAL ENVIRON POLIT	Glob. Environ. Polit.	AUG	2011	11	3
J	Kijazi, MH; Kant, S				Kijazi, Martin Herbert; Kant, Shashi			Forest stakeholders' value preferences in Mount Kilimanjaro, Tanzania	FOREST POLICY AND ECONOMICS			English	Article						Evaluation; Forest stakeholders; Multiple values; Social choice	SOCIAL CHOICE; CONTINGENT VALUATION; MANAGEMENT; CONSERVATION; AUSTRALIA		The study investigates societal states of forests that are perceived to enhance human and environmental well-being in Mount Kilimanjaro, Tanzania. Villagers, foresters, park employees, entrepreneurs and environmentalists were surveyed. The survey applied a multi-group social choice method, following six steps: (i) identification of all relevant social states for sustainable forest management; (ii…	[Kijazi, Martin Herbert; Kant, Shashi] Univ Toronto, Fac Forestry, Toronto, ON M5S 3B3, Canada	Kant, S (corresponding author), Univ Toronto, Fac Forestry, 33 Willcocks St, Toronto, ON M5S 3B3, Canada.	kijazimartin@gmail.com; shashi.kant@utoronto.ca			Ministry of Science and Technology, Government of Ontario, Canada	Financial support from the Premier Research Excellence Award (PREA), Ministry of Science and Technology, Government of Ontario, Canada, is greatly appreciated. The logistical support provided by Kilimanjaro National Park Authorities, in Tanzania, during the field work is also equally valued.	Arrow K.J., 1963, SOCIAL CHOICE INDIVI; Bateman IJ, 2000, J ENVIRON MANAGE, V60, P301, DOI 10.1006/jema.2000.0388; Blamey R, 1995, AUST J AGR ECON, V39, P263, DOI 10.1111/j.1467-8489.1995.tb00554.x; Borda J.C., 1781, ISIS, V44, P42; Bostedt G, 2006, J FOREST ECON, V12, P75, DOI 10.1016/j.jfe.2005.12.002; Brekke KA, 2003, J PUBLIC ECON, V87, P1967, DOI 10.1016/S0047-2727(01)00222-5; Bruntland G., …	45	20	21	2	22	ELSEVIER SCIENCE BV	AMSTERDAM	PO BOX 211, 1000 AE AMSTERDAM, NETHERLANDS	1389-9341	1872-7050		FOREST POLICY ECON	Forest Policy Econ.	JUN	2010	12	5
J	Uy, MA; Sun, SH; Foo, MD				Uy, Marilyn A.; Sun, Shuhua; Foo, Maw-Der			Affect spin, entrepreneurs' well-being, and venture goal progress: The moderating role of goal orientation	JOURNAL OF BUSINESS VENTURING			English	Article						Affect spin; Affect fluctuations; Goal orientation; Well-being; Venture goal progress	DISPOSITIONAL POSITIVE AFFECT; RISK PROPENSITY DIFFERENCES; INDIVIDUAL-DIFFERENCES; SELF-EFFICACY; INTRAINDIVIDUAL VARIABILITY; COPING STRATEGIES; JOB-SATISFACTION; SOCIAL SUPPORT; CORE AFFECT; PERFORMANCE	6	Using two experience sampling studies, we examined the relationship between affect fluctuations (i.e., affect spin) and goal orientation on psychological well-being and venture goal progress of early-stage startup entrepreneurs. We found that the entrepreneur's affect spin negatively related to well-being (Study 1) and venture goal progress (Study 2). Goal orientation moderated these relationship…	[Uy, Marilyn A.] Nanyang Technol Univ, Nanyang Business Sch, Div Strategy Management & Org, S3-B2B-69,50 Nanyang Ave, Singapore 639798, Singapore; [Sun, Shuhua] Tulane Univ, AB Freeman Sch Business, Div Management, 7 McAlister Dr, New Orleans, LA 70118 USA; [Foo, Maw-Der] Natl Univ Singapore, Div Engn & Technol Management, Fac Engn, 9 Engn Dr 1, Singapore 117575, Singapore	Uy, MA (corresponding author), Nanyang Technol Univ, Nanyang Business Sch, Div Strategy Management & Org, S3-B2B-69,50 Nanyang Ave, Singapore 639798, Singapore.	muy@ntu.edu.sg; ssun7@tulane.edu; foo@nus.edu.sg	Sun, Shuhua/Y-5728-2019; Foo, Maw Der/B-3255-2009	Sun, Shuhua/0000-0003-2058-7649; Foo, Maw Der/0000-0002-4887-081X; Uy, Marilyn/0000-0003-4265-4021			Aguinis H, 2010, ORGAN RES METHODS, V13, P515, DOI 10.1177/1094428109333339; Aiken LS, 1991, MULTIPLE REGRESSIONS; American Psychological Association, 2001, PUBL MAN AM PSYCH AS; Anderson CJ, 2003, PSYCHOL BULL, V129, P139, DOI 10.1037//0033-2909.129.1.139; Ashkanasy N. M., 2002, MANAGING EMOTIONS WO; BANDURA A, 1977, PSYCHOL REV, V84, P191, DOI 10.1037/0033-295X.84.2.191; Baron RA, 2006, MANAGE …	136	19	19	5	64	ELSEVIER	AMSTERDAM	RADARWEG 29, 1043 NX AMSTERDAM, NETHERLANDS	0883-9026	1873-2003		J BUS VENTURING	J. Bus. Ventur.	JUL	2017	32	4
J	Altan-Olcay, O				Altan-Olcay, Ozlem			Entrepreneurial Subjectivities and Gendered Complexities: Neoliberal Citizenship in Turkey	FEMINIST ECONOMICS			English	Article						L26; Z1; A14; economic identities; gender roles; women and development; citizenship; entrepreneurship; Women and work	WOMENS EMPOWERMENT; GLOBALIZATION; POVERTY; WELFARE		This contribution explores the promotion of women's entrepreneurial activities in Turkey. Using participant observation and semi-structured interviews conducted during 2011-12 in two civil-society organizations that run programs fostering women's entrepreneurship, this study shows how neoliberal ideologies interact with ideas of labor, responsibility, and gender. Emphasizing individual rationalit…	Koc Univ Int Relat, TR-34450 Istanbul, Sariyer, Turkey	Altan-Olcay, O (corresponding author), Koc Univ Int Relat, Rumelifeneri Yolu Sariyer, TR-34450 Istanbul, Sariyer, Turkey.	ozaltan@ku.edu.tr					Abu-Lughod L, 2009, INT J MIDDLE E STUD, V41, P83, DOI 10.1017/S0020743808090132; Adaman F., 2006, POVERTY SOCIAL EXCLU; Adaman Fikret, 2007, 500 MILYONLUK UMUT H; Adely FJ, 2009, INT J MIDDLE E STUD, V41, P105, DOI 10.1017/S0020743808090144; Altan-Olcay O, 2012, BRIT J MIDDLE E STUD, V39, P157, DOI 10.1080/13530194.2012.709699; Altan-Olcay O, 2011, NEW PERSPECT TURK, P41; Bakker I, 2007, NEW POL…	69	19	19	0	40	ROUTLEDGE JOURNALS, TAYLOR & FRANCIS LTD	ABINGDON	2-4 PARK SQUARE, MILTON PARK, ABINGDON OX14 4RN, OXON, ENGLAND	1354-5701	1466-4372		FEM ECON	Fem. Econ.	37530	2014	20	4
J	Amone-P'Olak, K				Amone-P'Olak, Kennedy			Coping with life in rebel captivity and the challenge of reintegrating formerly abducted boys in Northern Uganda	JOURNAL OF REFUGEE STUDIES			English	Article						abduction; captivity; coping; reintegration; Northern Uganda	TRAUMA EXPOSURE; CHILDREN; WAR; EXPERIENCES	11	In this qualitative study of 134 formerly abducted adolescent boys at four rehabilitation centres in Northern Uganda, the boys described their lives in rebel captivity and coping strategies and suggested ways of reintegration. They witnessed, endured and participated in hideous atrocities while in rebel captivity. Vigilance, absolute obedience, and cooperation with their captors; prayer and hope;…	Univ Groningen, Univ Med Ctr Groningen, Dept Social Psychiat & Psychiat Epidemiol, NL-9700 VB Groningen, Netherlands	Amone-P'Olak, K (corresponding author), Univ Groningen, Univ Med Ctr Groningen, Dept Social Psychiat & Psychiat Epidemiol, NL-9700 VB Groningen, Netherlands.	k.p.amone@med.umcg.nl		Amone-P'Olak, Kennedy/0000-0003-4493-0659			Acholi Religious Leaders' Peace Initiative (ARLPI), 2001, LET MY PEOPL GO FORG; AFAKO B, 2002, ACCORD, V11; AGER A, 2001, CULTIVATING HLTH CUL; ALEISSA YA, 1995, SOC SCI MED, V41, P1033, DOI 10.1016/0277-9536(94)00414-O; ALLEN T, 2005, WAR JUSTICE NO UGAND; Amone-P'Olak K., 2005, INTERVENTION, V3, P33; Amone-P'Olak Kennedy, 2006, Torture, V16, P93; AMONEPOLAK K, 2004, TORTURE, V14, P24; ANNAN J, …	61	19	19	2	4	OXFORD UNIV PRESS	OXFORD	GREAT CLARENDON ST, OXFORD OX2 6DP, ENGLAND	0951-6328	1471-6925		J REFUG STUD	J. Refug. Stud.	DEC	2007	20	4
J	Eversole, R				Eversole, R			Change makers? Women's microenterprises in a Bolivian city	GENDER WORK AND ORGANIZATION			English	Article						microenterprise; poverty; economic development; Bolivia	CREDIT		If entrepreneurs are society's innovators, what is the role of business-people in poor countries - particularly, the 'micro' businesspeople that make up the majority? What hope for decreasing poverty and improving livelihoods do microbusinesses offer? In particular, what is the role of women microentrepreneurs, whose incomes have been understood to contribute a great deal to the well-being of poo…	RMIT Univ, Hamilton, Vic 3300, Australia	Eversole, R (corresponding author), RMIT Univ, Glenelg Highway, Hamilton, Vic 3300, Australia.	robyn.eversole@rmit.edu.au		Eversole, Robyn/0000-0001-7482-6188			*ALA, 1997, PROYECT AS PROM PEQ; BABB FE, 1989, FIELD COOKING POT PO; BLUMBERG RL, 1993, WHERE DID ALL MEN GO, P13; BUECHLER H, 1992, MANUFACTURING ODDS S; *CAM IND COM CHUQ, 1995, DIAGN EMPR SECT IND; COOK S, 1990, OBLIGING NEED RURAL; Daniels L, 1998, ECON DEV CULT CHANGE, V47, P45, DOI 10.1086/452386; Ehlers TB, 1998, GENDER SOC, V12, P424, DOI 10.1177/089124398012004004; ENGLE PL, 1995, ENGEN…	32	19	20	0	11	WILEY	HOBOKEN	111 RIVER ST, HOBOKEN 07030-5774, NJ USA	0968-6673	1468-0432		GENDER WORK ORGAN	Gend. Work. Organ.	MAR	2004	11	2
J	Page, SJ; Hartwell, H; Johns, N; Fyall, A; Ladkin, A; Hemingway, A				Page, Stephen J.; Hartwell, Heather; Johns, Nick; Fyall, Alan; Ladkin, Adele; Hemingway, Ann			Case study: Wellness, tourism and small business development in a UK coastal resort: Public engagement in practice	TOURISM MANAGEMENT			English	Article						Well-being; Wellness tourism; Small business development; Coastal tourism; Public engagement	QUALITY-OF-LIFE; SATISFACTION; MODEL		This article examines the scope of well-being as a focus for tourism and its potential as a tool for small business development, particularly the opportunities for tourism entrepreneurs in coastal resorts. The study reports an example of public engagement by a research team and the co-creation of research knowledge with businesses to assist in business development by adapting many existing featur…	[Page, Stephen J.] Univ Hertfordshire, Hertfordshire Business Sch, Hatfield AL10 9AB, Herts, England; [Hartwell, Heather; Johns, Nick; Ladkin, Adele] Bournemouth Univ, Fac Management, Poole BH12 5BB, Dorset, England; [Fyall, Alan] Univ Cent Florida, Orlando, FL 32816 USA; [Hemingway, Ann] Bournemouth Univ, Fac Hlth & Social Sci, Poole BH12 5BB, Dorset, England	Page, SJ (corresponding author), Univ Hertfordshire, Hertfordshire Business Sch, Hatfield AL10 9AB, Herts, England.	s.page2@herts.ac.ulc	Ladkin, Adele/C-9629-2019; Hemingway, Ann/AAD-2512-2019	Hemingway, Ann/0000-0002-0920-3897; Johns, Nick/0000-0001-5364-190X; page, stephen/0000-0002-1756-4561; Ladkin, Adele/0000-0001-6810-7996	Economic and Social Research CouncilEconomic & Social Research Council (ESRC) [ES/L00884X/1]	This work was supported by the Economic and Social Research Council [grant number ES/L00884X/1]. Outcomes related to the project can be accessed at https://microsites.bournemouth.ac.uk/destinationfeelgood/ and qualitative and mixed methods data is deposited on ReShare at http://reshare.ukdataservice.ac.uk/. The authors would also like to thank Mr Stephen Calver and the Market Research Group for u…	Agarwal S, 2002, ANN TOURISM RES, V29, P25, DOI 10.1016/S0160-7383(01)00002-0; Alford P, 2015, SERV IND J, V35, P655, DOI 10.1080/02642069.2015.1062884; Anderson R., 2010, 96 DIR GEN NAT STAT; Australian Centre on Quality of Life, 2010, AUSTR UN WELL BEING; Barofsky I, 2012, QUAL LIFE RES, V21, P625, DOI 10.1007/s11136-011-9961-0; Birch M, 2005, BRIT J OCCUPATIONAL, V68, P244, DOI DOI 10.1177/030…	77	18	19	1	40	ELSEVIER SCI LTD	OXFORD	THE BOULEVARD, LANGFORD LANE, KIDLINGTON, OXFORD OX5 1GB, OXON, ENGLAND	0261-5177	1879-3193		TOURISM MANAGE	Tourism Manage.	JUN	2017	60
J	Pettersson, K; Ahl, H; Berglund, K; Tillmar, M				Pettersson, Katarina; Ahl, Helene; Berglund, Karin; Tillmar, Malin			In the name of women? Feminist readings of policies for women's entrepreneurship in Scandinavia	SCANDINAVIAN JOURNAL OF MANAGEMENT			English	Article						Feminist approach; Women; Entrepreneurship policy; Scandinavia	ENTERPRISE SUPPORT; GENDER; DISCOURSE; CRITIQUE	7	Policy actors seeking to stimulate entrepreneurship sometimes give special attention to women. It is not given, however, that policy initiatives for women entrepreneurs necessarily contribute to gender equality, to social change for women - such as enhancing entrepreneurship as a means to women's wellbeing and financial or other independence - or to gendered change of society. We claim that the o…	[Pettersson, Katarina] Swedish Univ Agr Sci, Dept Urban & Rural Dev, POB 7012, SE-75007 Uppsala, Sweden; [Ahl, Helene] Jonkoping Univ, Sch Educ & Commun, Jonkoping, Sweden; [Berglund, Karin] Stockholm Univ, Stockholm Business Sch, Stockholm, Sweden; [Tillmar, Malin] Linneaus Univ, Sch Business & Econ, Dept Org & Entrepreneurship, Vaxjo, Sweden; [Tillmar, Malin] Linkoping Univ, Dept Management & E…	Pettersson, K (corresponding author), Swedish Univ Agr Sci, Dept Urban & Rural Dev, POB 7012, SE-75007 Uppsala, Sweden.	katarina.pettersson@slu.se		Ahl, Helene/0000-0001-9367-7472	Swedish Research CouncilSwedish Research Council	We want to thank the anonymous reviewers for their helpful comments. This research was funded by the Swedish Research Council.	Acs ZJ, 2007, SMALL BUS ECON, V28, P109, DOI 10.1007/s11187-006-9012-3; Ahl H, 2006, ENTREP THEORY PRACT, V30, P595, DOI 10.1111/j.1540-6520.2006.00138.x; Ahl H, 2016, INT ENTREP MANAG J, V12, P369, DOI 10.1007/s11365-014-0341-4; Ahl H, 2015, J BUS VENTURING, V30, P273, DOI 10.1016/j.jbusvent.2014.08.002; Audretsch DB, 2007, ELGAR ORIG REF, P1; Berglund K., 2012, PROMOTING INNOVATION; Berglund K,…	64	18	18	4	34	ELSEVIER SCI LTD	OXFORD	THE BOULEVARD, LANGFORD LANE, KIDLINGTON, OXFORD OX5 1GB, OXON, ENGLAND	0956-5221	1873-3387		SCAND J MANAG	Scand. J. Manag.	MAR	2017	33	1
J	Kolk, A				Kolk, Ans			Linking Subsistence Activities to Global Marketing Systems: The Role of Institutions	JOURNAL OF MACROMARKETING			English	Article						institutions; marketing; society; development; poverty; coffee; macromarketing			This article aims to improve the understanding of how micro-level subsistence activities might be related to higher-level phenomena to increase the well-being of individuals and communities in contexts characterized by institutional gaps. Using coffee as illustrative case, it explores the link between local entrepreneurial activities in developing countries and global marketing systems, with spec…	Univ Amsterdam, Sch Business, NL-1018 TV Amsterdam, Netherlands	Kolk, A (corresponding author), Univ Amsterdam, Sch Business, Plantage Muidergracht 12, NL-1018 TV Amsterdam, Netherlands.	akolk@uva.nl	Kolk, Ans/J-9998-2012	Kolk, Ans/0000-0001-5345-2965			Achrol RS, 2012, J ACAD MARKET SCI, V40, P35, DOI 10.1007/s11747-011-0255-4; Ans Kolk, 2013, SUSTAINABLE VALUE CH, P415; Bruck T., 2011, J SMALL BUSINESS ENT, V24, P161; DRUCKER PF, 1958, J MARKETING, V22, P252, DOI 10.2307/1247116; Dubois A, 2002, J BUS RES, V55, P553, DOI 10.1016/S0148-2963(00)00195-8; Geiger-Oneto S, 2011, J MACROMARKETING, V31, P276, DOI 10.1177/0276146711405668; Hunt Shelby,…	34	18	18	1	34	SAGE PUBLICATIONS INC	THOUSAND OAKS	2455 TELLER RD, THOUSAND OAKS, CA 91320 USA	0276-1467	1552-6534		J MACROMARKETING	J. Macromarketing	MAR	2014	34	2
J	Markantoni, M; van Hoven, B				Markantoni, Marianna; van Hoven, Bettina			Bringing 'invisible' side activities to light. A case study of rural female entrepreneurs in the Veenkolonien, the Netherlands	JOURNAL OF RURAL STUDIES			English	Article						Side activities; Rural entrepreneurship; Rural women; Empowerment; The Netherlands; Veenkolonien	WOMEN; BUSINESS; FAMILY; MEN; SUCCESS; FIRMS	11	Over the past 20 years, rural areas in Western societies have transformed from a production to a consumption space. Much research on rural diversification and revitalization has focused on farmers and their wives. However, it is useful to examine side activities run by non-farm women which have slowly emerged in the last few years. In view of discussions about rural decline, the value of such act…	[Markantoni, Marianna; van Hoven, Bettina] Univ Groningen, Fac Spatial Sci, Dept Cultural Geog, NL-9747 AD Groningen, Netherlands	Markantoni, M (corresponding author), Univ Groningen, Fac Spatial Sci, Dept Cultural Geog, Landleven 1, NL-9747 AD Groningen, Netherlands.	m.markantoni@rug.nl; b.van.hoven@rug.nl		van Hoven, Bettina/0000-0002-6800-8602			Ahl H, 2006, ENTREP THEORY PRACT, V30, P595, DOI 10.1111/j.1540-6520.2006.00138.x; Aldrich HE, 2003, J BUS VENTURING, V18, P573, DOI 10.1016/S0883-9026(03)00011-9; Anthopoulou T, 2010, J RURAL STUD, V26, P394, DOI 10.1016/j.jrurstud.2010.03.004; Ateljevic I., 2000, J SUSTAIN TOUR, V8, P297; Atterton J., 2010, RURAL BUSINESS N E E; Baines S., 2000, GENDER WORK ORGAN, V7, P45, DOI DOI 10.1111/1468-…	68	18	19	5	46	PERGAMON-ELSEVIER SCIENCE LTD	OXFORD	THE BOULEVARD, LANGFORD LANE, KIDLINGTON, OXFORD OX5 1GB, ENGLAND	0743-0167			J RURAL STUD	J. Rural Stud.	OCT	2012	28	4
J	Richter, R				Richter, Ralph			Rural social enterprises as embedded intermediaries: The innovative power of connecting rural communities with supra-regional networks	JOURNAL OF RURAL STUDIES			English	Article						Rural social enterprises; Embedded intermediary; Social innovation; Social network analyses; Rural development	ENTREPRENEURSHIP; MIGRATION		The question of how social enterprises foster social innovation in rural regions remains largely unexplored. In this paper, I develop the assumption that the embeddedness of social enterprises in rural communities and their ability to connect rural communities with supra-regional networks and decision makers are crucial preconditions for generating and fostering social innovation in the countrysi…	[Richter, Ralph] Leibniz Inst Res Soc & Space IRS, Plakenstr 29-31, D-15537 Erkner, Germany	Richter, R (corresponding author), Leibniz Inst Res Soc & Space IRS, Plakenstr 29-31, D-15537 Erkner, Germany.	ralph.richter@leibniz-irs.de			EUEuropean Union (EU); European UnionEuropean Union (EU) [691181]	This study was carried out in the frame of the EU funded research project RurInno ("Social Innovation in Structurally Weak Rural Regions: How Social Entrepreneurs Foster Innovative Solutions to Social Problems"). I would like to acknowledge our interview partners for sharing their insights and experiences, our partners in the investigated regions for their openness and support, the colleagues at …	[Anonymous], 2013, PRESSE DIE 0913; Atterton J, 2007, SOCIOL RURALIS, V47, P228, DOI 10.1111/j.1467-9523.2007.00435.x; Bock BB, 2016, SOCIOL RURALIS, V56, P552, DOI 10.1111/soru.12119; Borzaga Carlo, 2016, SOC ENT THEIR EC DEV; Bosworth Gary, 2008, International Journal of Entrepreneurship and Small Business, V6, P355, DOI 10.1504/IJESB.2008.019132; Bosworth G, 2012, RURAL SOCIOL, V77, P254, DOI …	62	17	17	0	6	PERGAMON-ELSEVIER SCIENCE LTD	OXFORD	THE BOULEVARD, LANGFORD LANE, KIDLINGTON, OXFORD OX5 1GB, ENGLAND	0743-0167			J RURAL STUD	J. Rural Stud.	AUG	2019	70
J	Powell, GN; Eddleston, KA				Powell, Gary N.; Eddleston, Kimberly A.			Family Involvement in the Firm, Family-to-Business Support, and Entrepreneurial Outcomes: An Exploration	JOURNAL OF SMALL BUSINESS MANAGEMENT			English	Article							SOCIAL SUPPORT; ORGANIZATIONAL RESEARCH; WORK; STEWARDSHIP; PERSPECTIVE; PERFORMANCE; CONFLICT; OWNERSHIP; BENEFITS; SUCCESS		Results of a survey of 211 founders of small and medium-sized enterprises (SMEs) indicated that family involvement in the firm was indirectly related to four entrepreneurial outcomes (business performance, strategic planning, satisfaction with business success, and commitment to remain self-employed) through family-to-business support, suggesting a particular benefit of the intertwining of family…	[Powell, Gary N.] Univ Connecticut, Dept Management, 2100 Hillside Rd Unit 1041, Storrs, CT 06269 USA; [Powell, Gary N.] Univ Lancaster, Sch Management, Lancaster, England; [Eddleston, Kimberly A.] Northeastern Univ, DAmore McKim Sch Business, Boston, MA 02115 USA	Powell, GN (corresponding author), Univ Connecticut, Dept Management, 2100 Hillside Rd Unit 1041, Storrs, CT 06269 USA.; Powell, GN (corresponding author), Univ Lancaster, Lancaster, England.	gpowell@business.uconn.edu			Patricia and Timothy Friar Endowment at the University of Connecticut; Connecticut Center for Entrepreneurship and Innovation (CCEI) at the University of Connecticut; Daniel & Dorothy Grady Fellowship at Northeastern University	This research was supported by the Patricia and Timothy Friar Endowment at the University of Connecticut, the Connecticut Center for Entrepreneurship and Innovation (CCEI) at the University of Connecticut, and the Daniel & Dorothy Grady Fellowship at Northeastern University. An earlier version of this article was presented at the 2013 Theories of Family Enterprise Conference in London.	Adams GA, 1996, J APPL PSYCHOL, V81, P411, DOI 10.1037/0021-9010.81.4.411; Aldrich HE, 2003, J BUS VENTURING, V18, P573, DOI 10.1016/S0883-9026(03)00011-9; Anderson RC, 2003, J FINANC, V58, P1301, DOI 10.1111/1540-6261.00567; Anna AL, 2000, J BUS VENTURING, V15, P279, DOI 10.1016/S0883-9026(98)00012-3; Arregle JL, 2007, J MANAGE STUD, V44, P73, DOI 10.1111/j.1467-6486.2007.00665.x; Arregle JL, 20…	92	17	17	7	46	WILEY	HOBOKEN	111 RIVER ST, HOBOKEN 07030-5774, NJ USA	0047-2778	1540-627X		J SMALL BUS MANAGE	J. Small Bus. Manag.	OCT	2017	55	4
J	Yemini, M; Addi-Raccah, A; Katarivas, K				Yemini, Miri; Addi-Raccah, Audrey; Katarivas, Keren			I have a dream: School principals as entrepreneurs	EDUCATIONAL MANAGEMENT ADMINISTRATION & LEADERSHIP			English	Article						entrepreneurship; management; schools; school headteachers	ORIENTATION; INNOVATION; CONSTRUCT		Most policymakers and academics agree that entrepreneurship is indispensable to society's development and well-being. Fostering entrepreneurship has become a matter of highest priority in public policy worldwide. Given the growing pressures of decentralization and competitiveness that schools have faced over the last 20 years, the role of school principals as entrepreneurs is receiving growing in…	[Yemini, Miri; Addi-Raccah, Audrey; Katarivas, Keren] Tel Aviv Univ, Sch Educ, IL-69978 Tel Aviv, Israel	Yemini, M (corresponding author), Tel Aviv Univ, Sch Educ, IL-69978 Tel Aviv, Israel.	miriye@post.tau.ac.il	Addi-Raccah, Audrey/AAC-7641-2020; Yemini, Miri/B-2426-2016	Addi-Raccah, Audrey/0000-0002-2427-8782; Yemini, Miri/0000-0002-5633-6473			Addi-Raccah A., 2006, INT J KNOWLEDGE CULT, V6, P27; Addi-Raccah A, 2010, EDUC MANAG ADM LEAD, V38, P184, DOI 10.1177/1741143209356361; Aldrich H., 1986, ENTREPRENEURSHIP SOC; Antoncic B, 2001, J BUS VENTURING, V16, P495, DOI 10.1016/S0883-9026(99)00054-3; Austin J, 2006, ENTREP THEORY PRACT, V30, P1, DOI 10.1111/j.1540-6520.2006.00107.x; Baker T, 2005, ADMIN SCI QUART, V50, P329, DOI 10.2189/asq…	77	17	17	1	23	SAGE PUBLICATIONS LTD	LONDON	1 OLIVERS YARD, 55 CITY ROAD, LONDON EC1Y 1SP, ENGLAND	1741-1432	1741-1440		EDUC MANAG ADM LEAD	Educ. Manag. Adm. Leadersh.	JUL	2015	43	4
J	Naude, W; Amoros, JE; Cristi, O				Naude, Wim; Ernesto Amoros, Jose; Cristi, Oscar			Surfeiting, the appetite may sicken: entrepreneurship and happiness	SMALL BUSINESS ECONOMICS			English	Article						Happiness; Life satisfaction; Entrepreneurship; Development; Global Entrepreneurship Monitor	SELF-EMPLOYMENT; SATISFACTION; GROWTH; INCOME; DETERMINANTS; COUNTRIES; INCREASE; BUSINESS; HAPPY	1	Do the presence and nature of entrepreneurship impact on national happiness, and are nations with happy citizens better for entrepreneurs to start new businesses? To provide tentative answers we survey the literature on entrepreneurship and subjective well-being and use various data sources to uncover the first evidence of the relationship between entrepreneurship and happiness at the country lev…	[Naude, Wim] Univ Maastricht, Maastricht Sch Management, Maastricht, Netherlands; [Naude, Wim] United Nations Univ UNU MERIT, Maastricht, Netherlands; [Naude, Wim] IZA Inst Study Labour, Bonn, Germany; [Ernesto Amoros, Jose] Univ Desarrollo, Sch Business & Econ, Santiago, Chile; [Cristi, Oscar] Univ San Sebastian, Sch Business & Econ, Santiago, Chile	Naude, W (corresponding author), Univ Maastricht, Maastricht Sch Management, Maastricht, Netherlands.	naude@msm.nl; eamoros@udd.cl; oscar.cristi@uss.cl	Naude, Wim/E-3812-2017; Naude, Wim/R-5060-2019; Amoros, Jose Ernesto/D-8792-2013	Naude, Wim/0000-0003-2496-6945; Naude, Wim/0000-0003-2496-6945; Amoros, Jose Ernesto/0000-0001-9601-0892			Acemoglu D., 2012, WHY NATIONS FAIL ORI; ACS Z, 2011, GLOBAL ENTREPRENEURS; Acs ZJ, 2008, SMALL BUS ECON, V31, P305, DOI 10.1007/s11187-008-9133-y; Acs ZJ, 2009, FOUND TRENDS ENTREP, V5, P341, DOI 10.1561/0300000027; Ajayi-Obe O, 2005, J LABOR RES, V26, P501, DOI 10.1007/s12122-005-1017-1; Amabile T. M., 2005, ECON J, V107, P1815; Amoros J.E., 2008, INT ENTREPRENEURSHIP, V4, P381, DOI DOI 10.1007…	89	17	17	6	69	SPRINGER	DORDRECHT	VAN GODEWIJCKSTRAAT 30, 3311 GZ DORDRECHT, NETHERLANDS	0921-898X	1573-0913		SMALL BUS ECON	Small Bus. Econ. Group	MAR	2014	42	3
J	Blanchard, TC; Tolbert, C; Mencken, C				Blanchard, Troy C.; Tolbert, Charles; Mencken, Carson			The health and wealth of US counties: how the small business environment impacts alternative measures of development	CAMBRIDGE JOURNAL OF REGIONS ECONOMY AND SOCIETY			English	Article						small business; community well-being; public health; entrepreneurship	INCOME INEQUALITY; SELF-EMPLOYMENT; CREATIVE CLASS; COLLECTIVE EFFICACY; CIVIC ENGAGEMENT; LOCAL CAPITALISM; UNITED-STATES; FIRM SIZE; MORTALITY; COMMUNITY	5, 11	In this paper, we evaluate the prospects of small business-driven job creation by assessing the link between small business and population health, an alternative measure of economic development. We combine two literatures from the social capital perspective of aggregate community well-being to model the effects of small-business concentration on aggregate measures of population health. We argue t…	[Blanchard, Troy C.] Louisiana State Univ, Dept Sociol, Baton Rouge, LA 70803 USA; [Tolbert, Charles; Mencken, Carson] Baylor Univ, Dept Sociol, Waco, TX 76798 USA	Blanchard, TC (corresponding author), Louisiana State Univ, Dept Sociol, 126 Stubbs Hall, Baton Rouge, LA 70803 USA.	troy@lsu.edu; charlie_tolbert@baylor.edu; carson_mencken@baylor.edu	Tolbert, Charles M/B-8171-2008				Allen J., 2004, COMMUNITY DEV J, V39, P385, DOI DOI 10.1093/CDJ/BSH034; Amato LH, 2007, J BUS ETHICS, V72, P229, DOI 10.1007/s10551-006-9167-5; Araya R, 2006, SOC SCI MED, V62, P3072, DOI 10.1016/j.socscimed.2005.11.037; Arum R, 2004, REEMERGENCE OF SELF-EMPLOYMENT: A COMPARATIVE STUDY OF SELF-EMPLOYMENT DYNAMICS AND SOCIAL INEQUALITY; Blanchard TC, 2004, POPUL RES POLICY REV, V23, P309, DOI 10.1…	66	17	17	1	30	OXFORD UNIV PRESS	OXFORD	GREAT CLARENDON ST, OXFORD OX2 6DP, ENGLAND	1752-1378	1752-1386		CAMB J REG ECON SOC	Camb. J. Regions Econ. Soc.	MAR	2012	5	1
J	MINER, JB; SMITH, NR; BRACKER, JS				MINER, JB; SMITH, NR; BRACKER, JS			DEFINING THE INVENTOR-ENTREPRENEUR IN THE CONTEXT OF ESTABLISHED TYPOLOGIES	JOURNAL OF BUSINESS VENTURING			English	Article							MOTIVATION; GROWTH; FIRMS	5	Some 25 years ago while developing his type of entrepreneur and type of firm classification system, Smith (1967) thought he had identified a subtype of entrepreneur that did not fit either his craftsman or his opportunistic models. The data at that time were too sparse to be sure, but it appeared that there were certain entrepreneurs whose major concern was to develop an organization, not as an e…	UNIV LOUISVILLE,LOUISVILLE,KY 40292; UNIV OREGON,EUGENE,OR 97403	MINER, JB (corresponding author), SUNY BUFFALO,JACOBS MANAGEMENT CTR,SCH MANAGEMENT,BUFFALO,NY 14260, USA.						BAHNEE MS, 1987, THESIS ARIZONA STATE; COLLINS O, 1964, ENTERPRISING MAN; DAVIDSSON P, 1988, FRONTIERS ENTREPRENE, V8, P88; LAFUENTE A, 1989, STRATEGIC MANAGE J, V10, P17, DOI 10.1002/smj.4250100103; LESSNER M, 1974, EDUC PSYCHOL MEAS, V34, P455, DOI 10.1177/001316447403400236; MILNE T, 1982, SMALL BUSINESS RES D, P61; MINER JB, 1990, J BUS VENTURING, V5, P221, DOI 10.1016/0883-9026(90)90018-O; M…	13	17	17	1	17	ELSEVIER SCIENCE BV	AMSTERDAM	PO BOX 211, 1000 AE AMSTERDAM, NETHERLANDS	0883-9026			J BUS VENTURING	J. Bus. Ventur.	MAR	1992	7	2
J	Gellynck, X; Cardenas, J; Pieniak, Z; Verbeke, W				Gellynck, Xavier; Cardenas, Jorge; Pieniak, Zuzanna; Verbeke, Wim			Association between Innovative Entrepreneurial Orientation, Absorptive Capacity, and Farm Business Performance	AGRIBUSINESS			English	Article							MARKET ORIENTATION; KNOWLEDGE TRANSFER; INTEGRATIVE MODEL; TRUST; RESOURCES; LINKING; FIRMS; RISK		A growing interest emerges with regard to how entrepreneurship and innovation can contribute to the success and well-being of the farmers. The main objective of the study is to develop and test a model, which emphasizes the relationship of trust and innovative entrepreneurial orientation on absorptive capacity in an agricultural context. This article examines also the effect of absorptive capacit…	[Gellynck, Xavier; Cardenas, Jorge; Pieniak, Zuzanna; Verbeke, Wim] Univ Ghent, Fac Biosci Engn, Dept Agr Econ, B-9000 Ghent, Belgium; [Cardenas, Jorge] Escuela Super Politecn Litoral ESPOL, ESPAE Grad Sch Management, Guayaquil, Ecuador; [Cardenas, Jorge] Escuela Super Politecn Litoral ESPOL, Fac Mech Engn & Prod Sci, Ctr Rural Res, Guayaquil, Ecuador; [Pieniak, Zuzanna] Consumer & Sensory Res In…	Gellynck, X (corresponding author), Univ Ghent, Fac Biosci Engn, Dept Agr Econ, Coupure Links 653, B-9000 Ghent, Belgium.	Xavier.Gellynck@ugent.be; lcardena@espol.edu.ec; Zuzanna.Pieniak@gmail.com; Wim.Verbeke@ugent.be	Pieniak, Zuzanna/AAH-2058-2020; Verbeke, Wim/F-8373-2010	Verbeke, Wim/0000-0002-9967-7104			Alwang J., 2006, AM AGR EC ASS ANN M; ANDERSON JC, 1988, PSYCHOL BULL, V103, P411, DOI 10.1037/0033-2909.103.3.411; BAGOZZI RP, 1982, ADMIN SCI QUART, V27, P459, DOI 10.2307/2392322; BROWNE MW, 1992, SOCIOL METHOD RES, V21, P230; Caceres D., 1997, AGRO SUR, V25; Carter S., 1998, ENTREPREN REG DEV, V10, P17, DOI DOI 10.1080/08985629800000002; Carter S., 1998, INT SMALL BUS J, V16, P15, DOI DOI 10.…	78	16	17	1	277	WILEY	HOBOKEN	111 RIVER ST, HOBOKEN 07030-5774, NJ USA	0742-4477	1520-6297		AGRIBUSINESS	Agribusiness	WIN	2015	31	1
J	Huttunen, S				Huttunen, Suvi			Wood energy production, sustainable farming livelihood and multifunctionality in Finland	JOURNAL OF RURAL STUDIES			English	Article						Multifunctionality; Sustainable rural development; Bioenergy; Finland	RURAL-DEVELOPMENT; AGRICULTURE; DIVERSIFICATION; PLURIACTIVITY		Climate change and the projected depletion of fossil energy resources pose multiple global challenges. Innovative technologies offer interesting possibilities to achieve more sustainable outcomes in the energy production sector. Local, decentralized alternatives have the potential to sustain livelihoods in rural areas. One example of such a venture has emerged around heating businesses in rural F…	[Huttunen, Suvi] Univ Jyvaskyla, Dept Social Sci & Philosophy, Jyvaskyla 40014, Finland	Huttunen, S (corresponding author), Finnish Environm Inst, PL 140, Helsinki 00251, Finland.	suvi.huttunen@ymparisto.fi		Huttunen, Suvi/0000-0002-8484-9014			Akerman M, 2010, FOREST POLICY ECON, V12, P181, DOI 10.1016/j.forpol.2009.09.018; Alanen V.-M., 2007, FORESTRY SERIES, V715; Barbieri C, 2010, J RURAL STUD, V26, P465, DOI 10.1016/j.jrurstud.2010.07.001; Bessant KC, 2006, CAN REV SOC ANTHROP, V43, P51; Bristow G., 2010, BRASS WORKING PAPER, V60; Carney D., 2002, SUSTAINABLE LIVELIHO; Chambers R., 1992, 296 I DEV STUD; Dibden J, 2009, J RURAL STUD…	51	16	18	1	47	PERGAMON-ELSEVIER SCIENCE LTD	OXFORD	THE BOULEVARD, LANGFORD LANE, KIDLINGTON, OXFORD OX5 1GB, ENGLAND	0743-0167			J RURAL STUD	J. Rural Stud.	OCT	2012	28	4
J	Huijbens, EH				Huijbens, Edward H.			Developing Wellness in Iceland. Theming Wellness Destinations the Nordic Way	SCANDINAVIAN JOURNAL OF HOSPITALITY AND TOURISM			English	Article						Iceland; wellness; Myvatn; nature; Nordic; tourism and health	TOURISM; HEALTH		This paper deals with the development of Iceland as a wellness destination with specific focus on a development project in the north-east (NE) of the country. Iceland is known as a destination for nature-based tourism with the vast majority of people visiting the country for the wilderness or natural elements. Complementing the nature-based tourism on offer, especially in the uninhabited highland…	Univ Akureyri, Iceland Tourism Res Ctr, IS-600 Akureyri, Iceland	Huijbens, EH (corresponding author), Univ Akureyri, Iceland Tourism Res Ctr, IS-600 Akureyri, Iceland.	edward@unak.is		Huijbens, Edward H./0000-0003-1939-1286			Amin A, 2002, ENVIRON PLANN A, V34, P385, DOI 10.1068/a3439; Bjornsson A, 1990, NATTURUFROEDINGURINN, V60, P15; Bourdieu P., 1989, DISTINCTION SOCIAL C; Boyle M., 2003, EXAMINATION CHANGING; Brenholdt J. O., 2004, PERFORMING TOURIST P; Bristow R.S., 2009, SELECTED BIBLIO MED; BRITTON S, 1991, ENVIRON PLANN D, V9, P451, DOI 10.1068/d090451; Cohen S., 1992, ESCAPE ATTEMPTS THEO; Cornell J., 2006, T…	51	16	18	3	32	ROUTLEDGE JOURNALS, TAYLOR & FRANCIS LTD	ABINGDON	2-4 PARK SQUARE, MILTON PARK, ABINGDON OX14 4RN, OXON, ENGLAND	1502-2250	1502-2269		SCAND J HOSP TOUR	Scand. J. Hosp. Tour.		2011	11	1
J	Del Vecchio, P; Passiante, G				Del Vecchio, Pasquale; Passiante, Giuseppina			Is tourism a driver for smart specialization? Evidence from Apulia, an Italian region with a tourism vocation	JOURNAL OF DESTINATION MARKETING & MANAGEMENT			English	Article						Smart destination; Smart tourism; Regional development; Apulia; Big data; Smart specialization	TECHNOLOGY		This regional spotlight demonstrates how tourism can be used to promote smart regional growth. Specifically, the study focuses on Apulia, a region of Italy that is attempting to achieve intelligent, sustainable, and inclusive growth through the use of a smart specialization strategy. Smart specialization is a strategy for supporting the socio-economic development of the European Union, based on i…	[Del Vecchio, Pasquale; Passiante, Giuseppina] Univ Salento, Dept Engn Innovat, Lecce, Italy	Del Vecchio, P (corresponding author), Univ Salento, Dept Engn Innovat, Lecce, Italy.	pasquale.delvecchio@unisalento.it; giuseppina.passiante@unisalento.it					Aarikka-Stenroos L, 2012, IND MARKET MANAG, V41, P15, DOI 10.1016/j.indmarman.2011.11.008; Buhalis D., 2015, INFORM COMMUNICATION, V2015, P377, DOI DOI 10.1007/978-3-319-14343-9_28; Buhalis D, 2008, TOURISM MANAGE, V29, P609, DOI 10.1016/j.tourman.2008.01.005; Carayannis EG, 2014, J KNOWL ECON, V5, P212, DOI 10.1007/s13132-014-0185-8; D'Amore M., 2015, P ENTER2015 22 INT C; Del Vecchio P., 2014, …	20	15	15	9	46	ELSEVIER SCIENCE BV	AMSTERDAM	PO BOX 211, 1000 AE AMSTERDAM, NETHERLANDS	2212-571X			J DESTIN MARK MANAGE	J. Destin. Mark. Manag.	SEP	2017	6	3
J	Warriner, DS				Warriner, Doris S.			'Here, without English, you are dead': ideologies of language and discourses of neoliberalism in adult English language learning	JOURNAL OF MULTILINGUAL AND MULTICULTURAL DEVELOPMENT			English	Article						Ideology; discourse; neoliberalism; political economy; language learning	TRANSNATIONAL SOUTH-KOREA; SOCIOLINGUISTICS; GLOBALIZATION; SITE		Ideologies of language (and language learning) - in concert with discourses of individualism and meritocracy that characterize neoliberalism - shape pedagogical policies and practices in ways that are consequential for multilingual students all over the developing and developed world. To investigate how such intersections and influences work in adult language teaching/learning settings, this pape…	[Warriner, Doris S.] Arizona State Univ, Dept English, Tempe, AZ 85281 USA	Warriner, DS (corresponding author), Arizona State Univ, Dept English, Tempe, AZ 85281 USA.	doris.warriner@asu.edu					Althusser L., 1971, LENIN PHILOS OTHER E, P127; Auerbach E, 1995, J READING BEHAV, V27, P643, DOI 10.1080/10862969509547903; AUERBACH ER, 1985, TESOL QUART, V19, P475, DOI 10.2307/3586274; Blackledge A., 2003, J LANG IDENTITY EDUC, V2, P331, DOI DOI 10.1207/S15327701JLIE0204_7; Block D., 2012, NEOLIBERALISM APPL L, P56; Block D, 2012, NEOLIBERALISM APPL L; Block D, 2012, LANG TEACH RES, V16, P188…	40	15	15	6	22	ROUTLEDGE JOURNALS, TAYLOR & FRANCIS LTD	ABINGDON	2-4 PARK SQUARE, MILTON PARK, ABINGDON OX14 4RN, OXON, ENGLAND	0143-4632	1747-7557		J MULTILING MULTICUL	J. Multiling. Multicult. Develop.		2016	37	5
J	Weissman, E				Weissman, Evan			Entrepreneurial endeavors: (re)producing neoliberalization through urban agriculture youth programming in Brooklyn, New York	ENVIRONMENTAL EDUCATION RESEARCH			English	Article						Brooklyn; food politics; urban agriculture; neoliberalization; entrepreneurialism	DIVERSE ECONOMIES; OLD SCHOOL; FOOD; PRIVATIZATION; CALIFORNIA	5	Driven by social and environmental criticism of the neoliberalization of agro-food systems, urban agriculture today enjoys renewed interest throughout the United States as a primary space to engage the politics of food. Using Brooklyn, New York as a case study, I employ mixed qualitative methods to investigate the contradictions that arise in tensions between the goals of urban agriculture and it…	Syracuse Univ, Dept Publ Hlth Food Studies & Nutr, Syracuse, NY 13244 USA	Weissman, E (corresponding author), Syracuse Univ, Dept Publ Hlth Food Studies & Nutr, Syracuse, NY 13244 USA.	eweissma@syr.edu					Allen P, 2003, J RURAL STUD, V19, P61, DOI 10.1016/S0743-0167(02)00047-5; Allen P., 2004, TOGETHER TABLE SUSTA; Allen P, 2008, AGR HUM VALUES, V25, P157, DOI 10.1007/s10460-008-9120-6; Allen P, 2006, AGR HUM VALUES, V23, P401, DOI 10.1007/s10460-006-9019-z; Babbie E., 1990, SURVEY RES METHODS; Bakker K, 2007, ANTIPODE, V39, P430, DOI 10.1111/j.1467-8330.2007.00534.x; Brenner N, 2002, ANTIPODE, V3…	46	15	15	0	46	ROUTLEDGE JOURNALS, TAYLOR & FRANCIS LTD	ABINGDON	2-4 PARK SQUARE, MILTON PARK, ABINGDON OX14 4RN, OXON, ENGLAND	1350-4622	1469-5871		ENVIRON EDUC RES	Environ. Educ. Res.	APR 3	2015	21	3
J	Vestrum, I				Vestrum, Ingebjorg			The embedding process of community ventures: creating a music festival in a rural community	ENTREPRENEURSHIP AND REGIONAL DEVELOPMENT			English	Article						music festival; embeddedness; community venture; embedding process; rural community; social change	SOCIAL ENTREPRENEURSHIP; INTERFIRM NETWORKS; MIGRANT ENTREPRENEURSHIP; SMALL FIRMS; EMBEDDEDNESS; TRUST; OPPORTUNITIES; INNOVATION; PERFORMANCE; ENGAGEMENT		Community entrepreneurship is a potentially powerful mechanism to improve the well-being of rural communities. To mobilize inhabitants for collective action, an emerging community venture must be embedded within a local community. Yet, the embedding process of community ventures is not well understood. Accordingly, this study explores how a community entrepreneur (CE) embedded an emerging communi…	Nordland Res Inst, N-8049 Bodo, Norway	Vestrum, I (corresponding author), Nordland Res Inst, N-8049 Bodo, Norway.	ikv@nforsk.no					Anderson AR, 2002, ENTREP REGION DEV, V14, P193, DOI 10.1080/08985620110112079; Angrosino M. V., 2000, HDB QUALITATIVE RES; Austin J, 2006, ENTREP THEORY PRACT, V30, P1, DOI 10.1111/j.1540-6520.2006.00107.x; Bacq S, 2011, ENTREP REGION DEV, V23, P373, DOI 10.1080/08985626.2011.577242; Bellandi M, 2001, ENTREP REGION DEV, V13, P189, DOI 10.1080/08985620110051103; Besser TL, 2006, ENTREP REGION DEV…	83	15	15	3	35	ROUTLEDGE JOURNALS, TAYLOR & FRANCIS LTD	ABINGDON	2-4 PARK SQUARE, MILTON PARK, ABINGDON OX14 4RN, OXON, ENGLAND	0898-5626	1464-5114		ENTREP REGION DEV	Entrep. Reg. Dev.	AUG 8	2014	26	44050
J	Shir, N; Nikolaev, BN; Wincent, J				Shir, Nadav; Nikolaev, Boris N.; Wincent, Joakim			Entrepreneurship and well-being: The role of psychological autonomy, competence, and relatedness	JOURNAL OF BUSINESS VENTURING			English	Article						Entrepreneurship; Well-being; Self-organization; Psychological needs	SELF-DETERMINATION THEORY; JOB-SATISFACTION; NEED SATISFACTION; PERSONALITY-TRAITS; MENTAL-HEALTH; EMPLOYMENT; HAPPINESS; WORK; LIFE; MOTIVATION	1, 11	Drawing upon the self-determination theory, we develop a two-stage multi-path mediation model in which psychological autonomy mediates the relationship between active engagement in entrepreneurship and well-being partially through its effect on psychological competence and relatedness. We test this model on a representative sample of 1837 working individuals (251 early stage entrepreneurs) from S…	[Shir, Nadav] Stockholm Sch Econ, POB 6501, SE-11383 Stockholm, Sweden; [Shir, Nadav; Wincent, Joakim] Hanken Sch Econ, Arkadiankatu 22, Helsinki 00101, Finland; [Nikolaev, Boris N.] Baylor Univ, Hankamer Sch Business, One Bear Pl 98011, Waco, TX 76798 USA; [Wincent, Joakim] Lulea Univ Technol, Lulea, Sweden; [Wincent, Joakim] Univ St Gallen, St Gallen, Switzerland	Shir, N (corresponding author), Stockholm Sch Econ, POB 6501, SE-11383 Stockholm, Sweden.	naday.shir@hhs.se; borisnikolaev@baylor.edu; joakim.wincent@hanken.fi			Jan Wallander and Tom Hedelius Foundation [H2011-02941]; The Sweden-America Foundation	We are indebted to Carin Holmquist and Global Entrepreneurship Monitor for the opportunity to collect the data, and to Melissa Cardon, Sara Thorgren, Marco van Gelderen, and seminar participants at VU University Amsterdam, Amsterdam Centre for Entrepreneurship for feedback and suggestions. Funding from The Jan Wallander and Tom Hedelius Foundation (H2011-02941) and The Sweden-America Foundation i…	AKANDE A., 1994, J SMALL BUS MANAGE, V32, P83; Alesina A, 2004, J PUBLIC ECON, V88, P2009, DOI 10.1016/j.jpubeco.2003.07.006; Alvarez G, 2014, INT J MANPOWER, V35, P688, DOI 10.1108/IJM-11-2012-0169; Felicio JA, 2012, INT ENTREP MANAG J, V8, P467, DOI 10.1007/s11365-012-0232-5; Baard PP, 2004, J APPL SOC PSYCHOL, V34, P2045, DOI 10.1111/j.1559-1816.2004.tb02690.x; BARON RM, 1986, J PERS SOC PSYCH…	151	14	14	6	15	ELSEVIER	AMSTERDAM	RADARWEG 29, 1043 NX AMSTERDAM, NETHERLANDS	0883-9026	1873-2003		J BUS VENTURING	J. Bus. Ventur.	SEP	2019	34	5
J	Forcadell, FJ; Aracil, E				Javier Forcadell, Francisco; Aracil, Elisa			Sustainable banking in Latin American developing countries: Leading to (mutual) prosperity	BUSINESS ETHICS-A EUROPEAN REVIEW			English	Article							CORPORATE-SOCIAL-RESPONSIBILITY; MULTINATIONAL-ENTERPRISE; CONCEPTUAL-FRAMEWORK; INSTITUTIONAL THEORY; CSR; BUSINESS; PERFORMANCE; CONTEXT; ENTREPRENEURSHIP; SUBSIDIARIES		This article examines multinational banks' (MNBs) approaches to corporate social responsibility (CSR) in developing countries' subsidiaries, particularly in Latin America. Building on in-depth case studies of two MNBs that are based in Europe and market leaders in Latin America, we analyze their CSR motivations and outcomes in host countries. We examine institutional environments by applying the …	[Javier Forcadell, Francisco] ESIC Business & Mkt Sch, Madrid, Spain; [Javier Forcadell, Francisco] Univ Rey Juan Carlos, Dept Management, Madrid, Spain; [Aracil, Elisa] Univ Pontificia Comillas, ICADE, Madrid, Spain	Forcadell, FJ (corresponding author), Univ Rey Juan Carlos, Paseo Artilleros S-N, Madrid 28032, Spain.	franciscojavier.forcadell@urjc.es	Aracil, Elisa/AAS-4055-2020	Aracil, Elisa/0000-0002-8413-8204; Forcadell, Francisco Javier/0000-0003-0145-1842	Spanish Ministry of Economy and Competitiveness [ECO2015-67434-R, ECO2016-75379-R]	Spanish Ministry of Economy and Competitiveness, Grant/Award Number: ECO2015-67434-R and ECO2016-75379-R	Abreu MCS, 2013, SOC RESPONSIB J, V9, P571, DOI 10.1108/SRJ-04-2012-0046; Aguilera RV, 2007, ACAD MANAGE REV, V32, P836, DOI 10.5465/AMR.2007.25275678; Aguinis H, 2012, J MANAGE, V38, P932, DOI 10.1177/0149206311436079; Amaeshi K, 2016, J BUS ETHICS, V134, P135, DOI 10.1007/s10551-014-2420-4; Arenas D, 2016, BUS ETHICS, V25, P217, DOI 10.1111/beer.12113; Arya B, 2009, J MANAGE STUD, V46, P1089, D…	116	14	14	0	27	WILEY	HOBOKEN	111 RIVER ST, HOBOKEN 07030-5774, NJ USA	0962-8770	1467-8608		BUS ETHICS	Bus. Ethics	OCT	2017	26	4
J	Kooijman-van Dijk, AL				Kooijman-van Dijk, Annemarije L.			The role of energy in creating opportunities for income generation in the Indian Himalayas	ENERGY POLICY			English	Article						Energy; Income; Small enterprise	MICROFINANCE		Although it is clear that there are links between access to modern energy carriers and economic development, the necessary understanding of these links is lacking. Research in literature shows mixed results. This paper studies the mechanisms that link energy supply and impacts on income generation. Empirical data from 264 small scale enterprises in 16 clusters of villages in the Indian Himalayas …	Univ Twente, CSTM, NL-7500 AE Enschede, Netherlands	Kooijman-van Dijk, AL (corresponding author), Univ Twente, CSTM, POB 217, NL-7500 AE Enschede, Netherlands.						Aitken R, 2008, RENEWABLE ENERGY ACC; Balkema A.J., 2010, P BERL C HUM DIM GLO; Barnes Douglas F., 2007, CHALLENGE RURAL ELEC; BARNETT A, 2000, ENERGY FIGHT POVERTY; Bastakoti BP, 2003, APPL ENERG, V76, P145, DOI 10.1016/S0306-2619(03)00055-2; Birol F, 2005, OXFORD REV ECON POL, V21, P145, DOI 10.1093/oxrep/gri008; Brew-Hammond A, 2010, ENERG POLICY, V38, P2291, DOI 10.1016/j.enpol.2009.12.016; C…	43	14	14	0	12	ELSEVIER SCI LTD	OXFORD	THE BOULEVARD, LANGFORD LANE, KIDLINGTON, OXFORD OX5 1GB, OXON, ENGLAND	0301-4215	1873-6777		ENERG POLICY	Energy Policy	FEB	2012	41
J	Karlin, BE; Humphreys, K				Karlin, Bradley E.; Humphreys, Keith			Improving medicare coverage of psychological services for older Americans	AMERICAN PSYCHOLOGIST			English	Article						medicare; geriatric care; prevention; public policy; advocacy	RANDOMIZED CONTROLLED-TRIAL; MENTAL-HEALTH-SERVICES; LATE-LIFE DEPRESSION; PSYCHOTHERAPY; ADULTS; POLICY; CARE; DECISIONS; DISEASE; IMPACT	15	Professional psychology's ability to meet older Americans' psychological needs and to simultaneously thrive as a profession will be closely tied to the federal Medicare program over the coming decades. Despite legislative changes in the 1980s providing professional autonomy to psychologists and expanding coverage for mental health services, Medicare coverage policies, reimbursement mechanisms, an…	Vet Affairs Palo Alto Hlth Care Syst, Palo Alto, CA USA; Stanford Univ, Sch Med, Stanford, CA 94305 USA	Karlin, BE (corresponding author), VA Cent Off, Off Mental Hlth Serv 116, 810 Vermont Ave, Washington, DC 20420 USA.	bradley.karlin2@va.gov	Karlin, Bradley E./A-2112-2012	Karlin, Bradley/0000-0002-8184-3565			[Anonymous], 2003, LANCET, V361, P1755; Arean PA, 2002, BIOL PSYCHIAT, V52, P293, DOI 10.1016/S0006-3223(02)01371-9; BARCLAY L, 2006, MEDSCAPE MED NE 0913; BAUMGARTNER F, 1993, AGENDA INSTABILITY A; BEUTLER LE, 1987, J CONSULT CLIN PSYCH, V55, P550, DOI 10.1037/0022-006X.55.4.550; BLIZZARD R, 2004, GALLUP NEWS SER 0914; Bremmer MA, 2006, AM J GERIAT PSYCHIAT, V14, P523, DOI 10.1097/01.JGP.0000216…	54	14	14	1	10	AMER PSYCHOLOGICAL ASSOC	WASHINGTON	750 FIRST ST NE, WASHINGTON, DC 20002-4242 USA	0003-066X			AM PSYCHOL	Am. Psychol.	OCT	2007	62	7
J	Rahman, SA; Amran, A; Ahmad, NH; Taghizadeh, SK				Rahman, Syed Abidur; Amran, Azlan; Ahmad, Noor Hazlina; Taghizadeh, Seyedeh Khadijeh			Enhancing the Wellbeing of Base of the Pyramid Entrepreneurs through Business Success: The Role of Private Organizations	SOCIAL INDICATORS RESEARCH			English	Article						Entrepreneurship; Subjective wellbeing; Base of pyramid (BoP); Business success; Performance; Large private organization	PERFORMANCE; ENVIRONMENT; MANAGEMENT; HAPPINESS; DESIGN; MODELS; OWNERS; WOMEN		This study examines the relationship between base of the pyramid (BoP) entrepreneurship success and wellbeing. The major contention is that the success of the BoP entrepreneurs is influenced by information and training support provided by large private organizations. A total of 134 BoP entrepreneurs, who run community information centres in remote areas of Bangladesh with the support of a leading…	[Rahman, Syed Abidur; Ahmad, Noor Hazlina; Taghizadeh, Seyedeh Khadijeh] Univ Sains Malaysia, Sch Management, Minden 11800, Penang, Malaysia; [Amran, Azlan] Univ Sains Malaysia, Grad Sch Business, Minden 11800, Penang, Malaysia	Rahman, SA (corresponding author), Univ Sains Malaysia, Sch Management, Minden 11800, Penang, Malaysia.	syedabid728@gmail.com	Ahmad, Noor Hazlina/E-3589-2012; Taghizadeh, Seyedeh Khadijeh/I-4707-2016; Azlan, Amran/F-2503-2012	Taghizadeh, Seyedeh Khadijeh/0000-0002-4890-248X; Azlan, Amran/0000-0002-9747-547X; Rahman, Syed Abidur/0000-0002-7889-920X			Ahmad N.H., 2011, J ASIA PACIFIC BUSIN, V12, P207, DOI DOI 10.1080/10599231.2011.586855; Ahmad NH, 2010, INT J ENTREP BEHAV R, V16, P182, DOI 10.1108/13552551011042780; Ahmad NH, 2009, INT J ENTREP VENTUR, V1, P72, DOI 10.1504/IJEV.2009.023821; Alkire S., 2005, VALUING FREEDOMS SEN; Arnold DG, 2012, INT J TECHNOL MANAGE, V60, P44, DOI 10.1504/IJTM.2012.049105; Barnes L., 2012, EXAMINATION ENTREPR…	107	13	13	3	33	SPRINGER	DORDRECHT	VAN GODEWIJCKSTRAAT 30, 3311 GZ DORDRECHT, NETHERLANDS	0303-8300	1573-0921		SOC INDIC RES	Soc. Indic. Res.	MAY	2016	127	1
J	Nguyen, H; Sawang, S				Hieu Nguyen; Sawang, Sukanlaya			Juggling or Struggling? Work and Family Interface and Its Buffers among Small Business Owners	ENTREPRENEURSHIP RESEARCH JOURNAL			English	Article						small business owners; self-employed; entrepreneurship; work-family interface; social support; subjective and psychological well-being	JOB DEMAND-CONTROL; SOCIAL SUPPORT; VENTURE PERFORMANCE; POSITIVE-SPILLOVER; LIFE SATISFACTION; SPOUSAL SUPPORT; CAREER SUCCESS; CONFLICT; ENRICHMENT; ENTREPRENEURS	1	This study responds to calls for theory and research on work-family aspects in entrepreneurship research. This study examines the role of work-family conflict, work-family enhancement and social support on small business owners' (SBOs) well-being. Drawing from The Household Income and Labour Dynamics in Australia (HILDA) panel data, the sample is restricted to SBOs, married with children under th…	[Sawang, Sukanlaya] Queensland Univ Technol, QUT Business Sch, GPO Box 2434, Brisbane, Qld 4001, Australia; [Hieu Nguyen] Queensland Univ Technol, Sch Psychol & Counselling, Brisbane, Qld 4001, Australia	Sawang, S (corresponding author), Queensland Univ Technol, QUT Business Sch, GPO Box 2434, Brisbane, Qld 4001, Australia.	s.sawang@qut.edu.au	Sawang, Sukanlaya/W-3270-2019	Sawang, Sukanlaya/0000-0001-7977-7194			Abbey Antonia, 2010, BASIC APPL SOC PSYCH, V6, P111, DOI DOI 10.1207/S15324834BASP06022; Abele AE, 2009, J OCCUP ORGAN PSYCH, V82, P803, DOI 10.1348/096317909X470924; Adkins CL, 2013, J SMALL BUS MANAGE, V51, P196, DOI 10.1111/jsbm.12014; Aiken L. S., 1991, MULTIPLE REGRESSION; Aryee S, 2005, J APPL PSYCHOL, V90, P132, DOI 10.1037/0021-9010.90.1.132; Australian Bureau of Statistics, SMALL BUS AUS…	97	13	13	3	34	WALTER DE GRUYTER GMBH	BERLIN	GENTHINER STRASSE 13, D-10785 BERLIN, GERMANY	2194-6175	2157-5665		ENTREP RES J	Entrep. Res. J.	APR	2016	6	2
J	Dawson, C; de Meza, D; Henley, A; Arabsheibani, GR				Dawson, Christopher; de Meza, David; Henley, Andrew; Arabsheibani, G. Reza			ENTREPRENEURSHIP: CAUSE AND CONSEQUENCE OF FINANCIAL OPTIMISM	JOURNAL OF ECONOMICS & MANAGEMENT STRATEGY			English	Article							SENSATION SEEKING; SELF-EMPLOYMENT; RISK APPRAISAL; DECISION; EXPECTATIONS; CONSUMPTION; RETURNS; GROWTH; MONEY	8	Extant evidence that the self-employed overestimate their returns by a greater margin than employees is consistent with two mutually inclusive possibilities. Self-employment may foster optimism or intrinsic optimists may be drawn to self-employment. Previous research is generally unable to disentangle these effects because of reliance on cross-sectional data. Using longitudinal data, this paper f…	[Dawson, Christopher] Univ Bath, Sch Management, Bath BA2 7AY, Avon, England; [de Meza, David] Univ London London Sch Econ & Polit Sci, Dept Management, London WC2A 2AE, England; [Henley, Andrew] Aberystwyth Univ, Sch Management & Business, Aberystwyth SY23 3AL, Dyfed, Wales; [Arabsheibani, G. Reza] Swansea Univ, Sch Management, Swansea SA2 8PP, W Glam, Wales; [Arabsheibani, G. Reza] IZA Bonn, Bo…	Dawson, C (corresponding author), Univ Bath, Sch Management, Bath BA2 7AY, Avon, England.	cgd26@management.bath.ac.uk; d.de-meza@lse.ac.uk; a.g.henley@aber.ac.uk; g.arabsheibani@swansea.ac.uk	Henley, Andrew/M-6861-2016	Henley, Andrew/0000-0003-4057-1679; Dawson, Chris/0000-0003-2514-5372			AMIT R, 1995, J BUS VENTURING, V10, P95, DOI 10.1016/0883-9026(94)00017-O; Amit R, 2001, J BUS VENTURING, V16, P119, DOI 10.1016/S0883-9026(99)00044-0; Arabsheibani G, 2000, ECON LETT, V67, P35, DOI 10.1016/S0165-1765(99)00242-6; Balasuriya J., 2010, OPTIMISM PORTFOLIO C; Brown S, 2006, FISC STUD, V27, P313, DOI 10.1111/j.1467-8578.2006.00037.x; Burke AE, 2000, OXFORD B ECON STAT, V62, P565, DOI …	44	13	13	2	39	WILEY	HOBOKEN	111 RIVER ST, HOBOKEN 07030-5774, NJ USA	1058-6407	1530-9134		J ECON MANAGE STRAT	J. Econ. Manage. Strategy	WIN	2014	23	4
J	Campin, S; Barraket, J; Luke, B				Campin, Suzanne; Barraket, Jo; Luke, Belinda			micro-Business Community Responsibility in Australia: Approaches, Motivations and Barriers	JOURNAL OF BUSINESS ETHICS			English	Article						Micro-business; Micro-business community responsibility; Small business social responsibility; Social entrepreneurship	SOCIAL-RESPONSIBILITY; ETHICAL ATTITUDES; SMALL FIRMS; ENTREPRENEURSHIP; ENTERPRISE; CORPORATE; MANAGERS; SIZE; SMES	1	Micro and small businesses contribute the majority of business activity in the most developed economies. They are typically embedded in local communities and therefore well placed to influence community wellbeing. While there has been considerable theoretical and empirical analysis of corporate citizenship and corporate social responsibility (CSR), the nature of micro-business community responsib…	[Campin, Suzanne; Barraket, Jo; Luke, Belinda] Queensland Univ Technol, Brisbane, Qld 4001, Australia	Campin, S (corresponding author), Queensland Univ Technol, Brisbane, Qld 4001, Australia.	sue.campin1@bigpond.com; Jo.barraket@qut.edu.au; b.luke@qut.edu.au	Barraket, Jo/K-9522-2019	Barraket, Jo/0000-0001-7416-6458			Aggarwal S., 2007, J URBAN REGENERATION, V1, P260; Allen Consulting, 2008, SMALL MED SIZ ENT RE; Anderson H., 2006, 4 MON U CORP LAW ACC; *AUSTR COUNC SOC S, 2005, GIV AUSTR RES PHIL A; Australian Bureau of Statistics, 2007, COUNTS AUSTR BUS INC; Australian Bureau of Statistics, 2007, AUSTR IND 2007 08; Australian Institute for Corporate Responsibility, 2008, BUS COMM INT NEWSL B, V13; Bain W., 1…	140	13	13	1	45	SPRINGER	DORDRECHT	VAN GODEWIJCKSTRAAT 30, 3311 GZ DORDRECHT, NETHERLANDS	0167-4544	1573-0697		J BUS ETHICS	J. Bus. Ethics	JUL	2013	115	3
J	Finn, M; Sarangi, S				Finn, Mark; Sarangi, Srikant			Quality of life as a mode of governance: NGO talk of HIV 'positive' health in India	SOCIAL SCIENCE & MEDICINE			English	Article						India; quality of life (QOL); HIV/AIDS; non-government organizations (NGOs); neoliberal governmentality; foucault; empowerment	EMPOWERMENT; DISCOURSE; PEOPLE; STATE; AIDS; PUNE		Quality of life (QOL) is being increasingly emphasized in healthcare research and practice around the world as a desirable and measurable outcome of health policy, health-seeking behaviour and overall life satisfaction. Drawing on Foucauldian notions of governmentality and biopower, we take the position that the promotion of a universal and apolitical concept of QOL, as it pertains to individual …	[Finn, Mark] Cardiff Univ, Sch Social Sci, Cardiff CF10 3AT, Wales; [Sarangi, Srikant] Cardiff Univ, Hlth Commun Res Ctr, Cardiff CF10 3AT, Wales	Finn, M (corresponding author), Cardiff Univ, Sch Social Sci, 59 Pk Pl, Cardiff CF10 3AT, Wales.	finnm@cardiff.ac.uk; sarangi@cardiff.ac.uk					Armstrong D., 2004, SOCIAL THEORY HLTH, V2, P361, DOI DOI 10.1057/PALGRAVE.STH.8700038; Armstrong D, 2007, SOCIOL HEALTH ILL, V29, P570, DOI 10.1111/j.1467-9566.2007.01006.x; Banerji D, 2004, INT J HEALTH SERV, V34, P123, DOI 10.2190/9N5U-4NFK-FQDH-J46W; Barry A., 1996, FOUCAULT POLITICAL R; Bowling A., 2005, MEASURING HLTH REV Q; Crossley M, 1998, SOCIOL HEALTH ILL, V20, P507, DOI 10.1111/1467-9…	39	13	14	0	10	PERGAMON-ELSEVIER SCIENCE LTD	OXFORD	THE BOULEVARD, LANGFORD LANE, KIDLINGTON, OXFORD OX5 1GB, ENGLAND	0277-9536			SOC SCI MED	Soc. Sci. Med.	APR	2008	66	7
J	Rahman, SA; Taghizadeh, SK; Ramayah, T; Alam, MMD				Rahman, Syed Abidur; Taghizadeh, Seyedeh Khadijeh; Ramayah, T.; Alam, Mirza Mohammad Didarul			Technology acceptance among micro-entrepreneurs in marginalized social strata: The case of social innovation in Bangladesh	TECHNOLOGICAL FORECASTING AND SOCIAL CHANGE			English	Article						Technology acceptance; Technology readiness; Well-being; Micro-entrepreneurs; Mobile money services; Bangladesh	INFORMATION-TECHNOLOGY; USER ACCEPTANCE; PERCEIVED EASE; READINESS; MODEL; CUSTOMERS; HAPPINESS; SERVICES; ADOPTION; POVERTY		Technology adoption by the marginalized community is indeed an important issue in global poverty reduction. To realize it, this paper contributes by doing an empirical test of the technology acceptance model, amongst those users typically always deprived in the existing social structure. Firstly, the study aims to examine the influence of Technology Readiness Index (TRI) 2.0's four indicators (op…	[Rahman, Syed Abidur] Univ Utara Malaysia, OYA Grad Sch Business, Sintok 06010, Kedah Darul Ama, Malaysia; [Taghizadeh, Seyedeh Khadijeh] Univ Teknol PETRONAS, Ctr Social Innovat, Seri Iskandar, Malaysia; [Ramayah, T.] Univ Sains Malaysia, Sch Management, Technol Management, George Town, Malaysia; [Alam, Mirza Mohammad Didarul] United Int Univ, Sch Business & Econ, Dhaka, Bangladesh	Rahman, SA (corresponding author), Univ Utara Malaysia, OYA Grad Sch Business, Sintok 06010, Kedah Darul Ama, Malaysia.	syedabid728@gmail.com	Taghizadeh, Seyedeh Khadijeh/I-4707-2016; Ramayah, T./E-4629-2010; Alam, Mirza Mohammad Didarul/AAB-3184-2020	Taghizadeh, Seyedeh Khadijeh/0000-0002-4890-248X; Ramayah, T./0000-0002-7580-7058; Alam, Mirza Mohammad Didarul/0000-0001-8657-8134; Rahman, Syed Abidur/0000-0002-7889-920X			Agarwal R, 2000, MIS QUART, V24, P665, DOI 10.2307/3250951; Agarwal R, 1998, INFORM SYST RES, V9, P204, DOI 10.1287/isre.9.2.204; Allred SB, 2011, SMALL-SCALE FOR, V10, P305, DOI 10.1007/s11842-010-9150-y; Amin A, 2014, THE COST OF BKASH; Ashraf MM, 2011, INFORM TECHNOL DEV, V17, P153, DOI 10.1080/02681102.2010.542448; Bangladesh Bank, 2012, POL PAP MOB FIN SERV; Baruch Y, 1999, HUM RELAT, V52, P…	71	12	12	3	49	ELSEVIER SCIENCE INC	NEW YORK	STE 800, 230 PARK AVE, NEW YORK, NY 10169 USA	0040-1625	1873-5509		TECHNOL FORECAST SOC	Technol. Forecast. Soc. Chang.	MAY	2017	118
J	Jenson, J				Jenson, Jane			Modernising the European Social Paradigm: Social Investments and Social Entrepreneurs	JOURNAL OF SOCIAL POLICY			English	Article							POLICY PARADIGMS; STATE		Policy perspectives of the European Union as well as those of member states currently link the concepts of social investment and social entrepreneurship in order to advocate both where and how to intervene. The argument of this article is that the explicit linking of these two notions, by policy-makers at several different levels and scales of authority, constitutes an emerging policy paradigm. T…	[Jenson, Jane] Univ Montreal, Dept Polit Sci, CP 6128,Succursale Ctr Ville, Montreal, PQ H4L 2H8, Canada	Jenson, J (corresponding author), Univ Montreal, Dept Polit Sci, CP 6128,Succursale Ctr Ville, Montreal, PQ H4L 2H8, Canada.	jane.jenson@umontreal.ca					Bernard P., 1999, LIEN SOCIAL POLITIQU, V41, P47, DOI DOI 10.7202/005057AR; Blomqvist P, 2004, SOC POLICY ADMIN, V38, P139, DOI 10.1111/j.1467-9515.2004.00382.x; Bonoli G, 2005, POLICY POLIT, V33, P431, DOI 10.1332/0305573054325765; Brennan D, 2012, J EUR SOC POLICY, V22, P377, DOI 10.1177/0958928712449772; Cantillon B, 2013, SOC POLICY SOC, V12, P553, DOI 10.1017/S1474746413000080; Capacity, 200…	46	12	12	1	29	CAMBRIDGE UNIV PRESS	NEW YORK	32 AVENUE OF THE AMERICAS, NEW YORK, NY 10013-2473 USA	0047-2794	1469-7823		J SOC POLICY	J. Soc. Policy	JAN	2017	46	1
J	Serenari, C; Peterson, MN; Wallace, T; Stowhas, P				Serenari, Christopher; Peterson, M. Nils; Wallace, Tim; Stowhas, Paulina			Private protected areas, ecotourism development and impacts on local people's well-being: a review from case studies in Southern Chile	JOURNAL OF SUSTAINABLE TOURISM			English	Article						Chile; ecotourism; private protected area; sustainable development; well-being	NEOLIBERAL CONSERVATION; QUALITATIVE RESEARCH; TEMPERATE FORESTS; TOURISM; FRAMEWORK		Private protected areas (PPAs) are expanding rapidly in less-industrialized nations. This paper explores cases in Los Rios, Chile, to understand how local people living in and near three PPAs viewed impacts of tourism development on human well-being and local governance asking: (1) Why and how do governing PPA actors engage local people in conservation and ecotourism? (2) How do local people perc…	[Serenari, Christopher] North Carolina Wildlife Resources Commiss, 1751 Vars Dr, Raleigh, NC 27606 USA; [Peterson, M. Nils] North Carolina State Univ, Dept Forestry & Environm Resources, Fisheries Wildlife & Conservat Biol Program, Raleigh, NC 27695 USA; [Wallace, Tim] North Carolina State Univ, Dept Sociol & Anthropol, 220 1911 Bldg, Raleigh, NC 27695 USA; [Stowhas, Paulina] Univ Mayor, Fac Cien…	Serenari, C (corresponding author), North Carolina Wildlife Resources Commiss, 1751 Vars Dr, Raleigh, NC 27606 USA.	cserena@ncsu.edu		Peterson, Nils/0000-0002-4246-1206	Tourism Cares; Laarman International Gift Fund; American Alpine Club; Food and Agricultural Sciences National Needs Fellowship Grants Program	We also like to recognize the following funding sources for their contribution to this research: Tourism Cares; Laarman International Gift Fund; American Alpine Club; Food and Agricultural Sciences National Needs Fellowship Grants Program.	Adams W.M., 2007, CONSERV SOC, V5, P147, DOI DOI 10.2307/26392879; Agrawal A., 2005, ENV TECHNOLOGIES GOV; Alderman C. L., 1991, ECOTOURISM RESOURCE, P289; Armesto JJ, 2001, J ROY SOC NEW ZEAL, V31, P865, DOI 10.1080/03014223.2001.9517681; Ballantyne R, 2013, INTERNATIONAL HANDBOOK ON ECOTOURISM, P1, DOI 10.4337/9780857939975; Barany M. E., 2001, Journal of Sustainable Tourism, V9, P95, DOI 10.10…	67	12	13	6	35	CHANNEL VIEW PUBLICATIONS	CLEVEDON	FRANKFURT LODGE, CLEVEDON HALL, VICTORIA ROAD, CLEVEDON, BS21 7HH, ENGLAND	0966-9582	1747-7646		J SUSTAIN TOUR	J. Sustain. Tour.		2017	25	12
J	Hetschko, C				Hetschko, Clemens			On the misery of losing self-employment	SMALL BUSINESS ECONOMICS			English	Article						Life satisfaction; Self-employment; Probability of losing work; Unemployment	PSYCHOLOGICAL IMPACT; LIFE SATISFACTION; JOB-SATISFACTION; TIME-USE; UNEMPLOYMENT; UNHAPPINESS; WORK; ENTREPRENEURSHIP; DETERMINANTS; PREFERENCES		Using German panel data, this study compares responses of self-employed workers' well-being and paid employees' well-being to the loss of work. The empirical analyses show that life satisfaction decreases substantially more in the probability of losing work when self-employed than when paid-employed. It also turns out that becoming unemployed yields a much stronger decline in self-employed worker…	[Hetschko, Clemens] Free Univ Berlin, Sch Business & Econ, Boltzmannstr 20, D-14195 Berlin, Germany	Hetschko, C (corresponding author), Free Univ Berlin, Sch Business & Econ, Boltzmannstr 20, D-14195 Berlin, Germany.	Clemens.Hetschko@fu-berlin.de					Andersson P., 2008, J SOCIO-ECON, V37, P213, DOI DOI 10.1016/J.S0CEC.2007.03.003; Benz M, 2008, ECONOMICA, V75, P362, DOI 10.1111/j.1468-0335.2007.00594.x; Benz M, 2008, J ECON BEHAV ORGAN, V68, P445, DOI 10.1016/j.jebo.2006.10.014; Binder M, 2013, SMALL BUS ECON, V40, P1009, DOI 10.1007/s11187-011-9413-9; Blanchflower DG, 2004, J PUBLIC ECON, V88, P1359, DOI 10.1016/S0047-2727(02)00168-8; Blanch…	53	12	12	2	19	SPRINGER	DORDRECHT	VAN GODEWIJCKSTRAAT 30, 3311 GZ DORDRECHT, NETHERLANDS	0921-898X	1573-0913		SMALL BUS ECON	Small Bus. Econ. Group	AUG	2016	47	2
J	Paswan, AK; Tran, TP				Paswan, Audhesh K.; Tran, Trang P.			Vietnam and Entrepreneurial Private Enterprises: A Macromarketing Perspective	JOURNAL OF MACROMARKETING			English	Article						Entrepreneurial private enterprise; economic well being; quality of life; Vietnam	QUALITY-OF-LIFE; TRANSITION ECONOMIES; COMPLEX-SYSTEMS; INCOME GROWTH; CHALLENGES; COUNTRIES; EDUCATION		This study focuses on the phenomenon of entrepreneurial private enterprises and their macromarketing implications in Vietnam-a vibrant economy transitioning from a centrally planned economy to the current system of socialist-oriented market economy. Relying on the writings on entrepreneurship and associated theoretical frameworks (including the complex adaptive system [CAS] perspective), especial…	[Paswan, Audhesh K.] Univ N Texas, Dept Mkt & Logist, Coll Business, Denton, TX 76203 USA	Paswan, AK (corresponding author), Univ N Texas, Dept Mkt & Logist, Coll Business, 1155 Union Circle 311160, Denton, TX 76203 USA.	paswana@unt.edu					Alon I., 2004, J MACROMARKETING, V24, P156; AMIT R, 1993, J MANAGE STUD, V30, P815, DOI 10.1111/j.1467-6486.1993.tb00327.x; ANAND S, 1993, J ECON PERSPECT, V7, P133, DOI 10.1257/jep.7.1.133; [Anonymous], 2011, BBC NEWS 0207; Ardrey William J., 2006, CONSUMP MARK CULT, V9, P277, DOI DOI 10.1080/10253860600921811; Arikan AT, 2010, J SMALL BUS MANAGE, V48, P152; Arthur W.B., 1997, EC EVOLVING COMPLE…	87	12	12	2	14	SAGE PUBLICATIONS INC	THOUSAND OAKS	2455 TELLER RD, THOUSAND OAKS, CA 91320 USA	0276-1467	1552-6534		J MACROMARKETING	J. Macromarketing	MAR	2012	32	1
J	Vial, V				Vial, Virginie			MICRO-ENTREPRENEURSHIP IN A HOSTILE ENVIRONMENT: EVIDENCE FROM INDONESIA	BULLETIN OF INDONESIAN ECONOMIC STUDIES			English	Article							INDUSTRIALIZATION		The contribution of micro-entrepreneurship to development has featured prominently in recent economic and policy debates. Using panel data from the Indonesia Family Life Survey over a long period (1993-2007) marked by an important economic crisis in 1997, this paper investigates the impact of financial, human and social capital on households' participation in micro-entrepreneurship, while account…	[Vial, Virginie] Euromed Management, Marseille, France; [Vial, Virginie] Ctr Rech Dev Econ & Finance Int, Aix En Provence, France	Vial, V (corresponding author), Euromed Management, Marseille, France.						BAUMOL WJ, 1990, J POLIT ECON, V98, P893, DOI 10.1086/261712; De Soto H., 2001, MYSTERY CAPITAL; Delmar F., 2000, ENTREP REGION DEV, V12, P1, DOI DOI 10.1080/089856200283063; Dyer WG, 2005, FAM BUS REV, V18, P247, DOI 10.1111/j.1741-6248.2005.00045.x; EVANS DS, 1989, AM ECON REV, V79, P519; FRANKENBERG E, 2000, DRU22381NIANICHD RAN; FRANKENBERG E, 1995, DRU11951NICHDAID RAN; Gentry William, 2004,…	32	12	12	2	20	ROUTLEDGE JOURNALS, TAYLOR & FRANCIS LTD	ABINGDON	2-4 PARK SQUARE, MILTON PARK, ABINGDON OX14 4RN, OXON, ENGLAND	0007-4918	1472-7234		B INDONES ECON STUD	Bull. Indones. Econ. Stud.		2011	47	2
J	Drnovsek, M; Ortqvist, D; Wincent, J				Drnovsek, Mateja; Ortqvist, Daniel; Wincent, Joakim			The effectiveness of coping strategies used by entrepreneurs and their impact on personal well-being and venture performance	ZBORNIK RADOVA EKONOMSKOG FAKULTETA U RIJECI-PROCEEDINGS OF RIJEKA FACULTY OF ECONOMICS			English	Article						Coping; problem-based coping; emotion-based coping; roles; entrepreneur; venture performance; well-being	ROLE-CONFLICT; ORGANIZATION STRUCTURE; WORK; JOB; SATISFACTION; CENTRALITY; AMBIGUITY; STRESS; PARTNERSHIPS; HUSBANDS	1, 14	This paper analyzes effectiveness of coping strategies that entrepreneurs use to daily manage work related stress. Coping is the process of expending efforts to solve personal and interpersonal problems and reducing stress induced by unpleasant and stressful situations. Two broad strategies of coping are identified; problem-based coping refers to a cognitively-based response behavior that include…	[Drnovsek, Mateja] Univ Ljubljana, Fac Econ, Ljubljana 1000, Slovenia; [Wincent, Joakim] Lulea Univ Technol, Entrepreneurship Dept, SE-97187 Lulea, Sweden; [Wincent, Joakim] Umea Univ, Umea Sch Business, SE-90187 Umea, Sweden	Drnovsek, M (corresponding author), Univ Ljubljana, Fac Econ, Kardeljeva Ploscad 17, Ljubljana 1000, Slovenia.	mateja.drnovsek@ef.uni-lj.si; daniel.ortqvist@ltu.se; wincent@usbe.umu.se	Drnovsek, Mateja/AAQ-1716-2020; Ortqvist, Daniel/I-9265-2019; wang, bo/D-4056-2014	Ortqvist, Daniel/0000-0001-6921-1779;			ABDELHALIM AA, 1982, J OCCUP BEHAV, V3, P281, DOI 10.1002/job.4030030403; Ahmad S. Z., 2010, INT J ENTREPRENEURSH, V14, P25; Anderson C., 1992, ACAD MANAGEMENT P, P65; Andersson G, 2003, INT J AUDIOL, V42, pS97; Aparicio J.C., 2002, WORKING STRESS MAGAZ, V5, P14; Ashforth BE, 2001, ROLE TRANSITIONS ORG; Baron RA, 2000, J BUS VENTURING, V15, P79, DOI 10.1016/S0883-9026(98)00024-X; Boles JS, 1996, …	84	12	12	1	41	UNIV RIJEKA, FAC ECOMOMICS	RIJEKA	IVANA FILIPOVICA 4, RIJEKA, 51000, CROATIA	1331-8004	1846-7520		ZB RAD EKON FAK RIJE	Zb. Rad. Ekon. Fak. Rijeci		2010	28	2
J	Gimmon, E; Levie, J				Gimmon, Eli; Levie, Jonathan			Instrumental Value Theory and the Human Capital of Entrepreneurs	JOURNAL OF ECONOMIC ISSUES			English	Article						instrumental value theory; entrepreneurship; human capital	WOMEN ENTREPRENEURS; PREDICTION MODEL; HIGH-TECH; VENTURE; BUSINESS; SUCCESS; DESTRUCTION; SURVIVAL; CRITERIA		Given the contribution of Schumpeterian entrepreneurship to technological progress and well-being, the accuracy of investment decisions by venture capitalists is a societal issue. Venture capitalists find the human capital of entrepreneurs difficult to assess. This paper employs instrumental value theory to assess the impact of different human capital factors on the performance of new ventures. A…	[Gimmon, Eli] Tel Hai Acad Coll, Tel Aviv, Israel; [Levie, Jonathan] Univ Strathclyde, Hunter Ctr Entrepreneurship, Glasgow G1 1XQ, Lanark, Scotland	Gimmon, E (corresponding author), Tel Hai Acad Coll, Tel Aviv, Israel.			Levie, Jonathan/0000-0002-3073-8351			Adkisson RV, 2004, J ECON ISSUES, V38, P459, DOI 10.1080/00213624.2004.11506706; Alvarez SA, 2001, J MANAGE, V27, P755, DOI 10.1016/S0149-2063(01)00122-2; Ayres C. E., 1961, REASONABLE SOC VALUE; Bamford C.E.R., 1996, FRONTIERS ENTREPRENE, P465; Baron RA, 2000, ACAD MANAGE EXEC, V14, P106, DOI 10.5465/AME.2000.2909843; Baum JR, 2001, ACAD MANAGE J, V44, P292, DOI 10.2307/3069456; BAUMOL WJ, 1990,…	79	12	13	0	44	ROUTLEDGE JOURNALS, TAYLOR & FRANCIS LTD	ABINGDON	2-4 PARK SQUARE, MILTON PARK, ABINGDON OX14 4RN, OXON, ENGLAND	0021-3624	1946-326X		J ECON ISSUES	J. Econ. Issues	SEP	2009	43	3
J	Summerfield, G				Summerfield, G			Economic transition in China and Vietnam: Crossing the poverty line is just the first step for women and their families	REVIEW OF SOCIAL ECONOMY			English	Article; Proceedings Paper	Symposium on The Family and Economic Transformation: Impacts and Strategies at the NGO Forum on the United-Nations 4th World Conference on Women	AUG 30-SEP 09, 1995	HUAIROU, PEOPLES R CHINA	UN		women; families; strategies; bargaining power			This paper compares the changing strategies of women and their families during the economic transition in China and Vietnam. Employment strategies to improve the family's well-being have resulted in increased rural-urban migration by men and young women, while middle-aged, married women remain in the countryside taking care of the farms and children. Although women have been able to take advantag…		Summerfield, G (corresponding author), MONTEREY INST INT STUDIES,MONTEREY,CA 93940, USA.						ASLANBEIGUI N, 1994, WOMEN AGE EC TRANSFO; Beneria L., 1992, UNEQUAL BURDEN EC CR; BLUMBERG RL, 1995, ENGENDERING WEALTH W; BLUMBERG RL, 1994, INSTRAW NEWS, V20, P36; FOLBRE N, 1994, AM ECON REV, V84, P86; Folbre N., 1994, WHO PAYS KIDS GENDER; FONG MS, 1994, ESP DISCUSSION PAPER, V48; *GEN STAT OFF, 1991, VIET NAM POP CENS 19; Haddad L., 1994, 1255 WORLD BANK; *IURD, 1994, WOM SOC TRANS VIETN; J…	28	12	12	0	5	ROUTLEDGE	LONDON	11 NEW FETTER LANE, LONDON, ENGLAND EC4P 4EE	0034-6764			REV SOC ECON	Rev. Soc. Econ.	SUM	1997	55	2
J	Westman, L; Luederitz, C; Kundurpi, A; Mercado, AJ; Weber, O; Burch, SL				Westman, Linda; Luederitz, Christopher; Kundurpi, Aravind; Mercado, Alexander Julian; Weber, Olaf; Burch, Sarah Lynne			Conceptualizing businesses as social actors: A framework for understanding sustainability actions in small- and medium-sized enterprises	BUSINESS STRATEGY AND THE ENVIRONMENT			English	Article						business sustainability; embeddedness; SMEs; social actor; social relationships	SMES; ENTREPRENEURSHIP; CSR; STRATEGIES; INNOVATION; ETHICS; FIRMS	2	Small- and medium-sized enterprises (SMEs) can play a crucial role in advancing environmental and social well-being. Yet various-often conflicting-explanations have been offered to clarify why SMEs pursue sustainability. Some arguments foreground possibilities of profit maximization, whereas others emphasize individual values and convictions. Research supporting such contradicting explanations is…	[Westman, Linda; Luederitz, Christopher; Kundurpi, Aravind; Mercado, Alexander Julian; Burch, Sarah Lynne] Univ Waterloo, Fac Environm, Geog & Environm Management, SPROUT Lab, Waterloo, ON, Canada; [Weber, Olaf] Univ Waterloo, Fac Environm, Sch Environm Enterprise & Dev, Waterloo, ON, Canada	Westman, L (corresponding author), Univ Waterloo, Fac Environm, Geog & Environm Management, 200 Univ Ave West, Waterloo, ON N2L 3G1, Canada.	linda.westman@uwaterloo.ca	Luederitz, Christopher/AAE-1410-2019	Luederitz, Christopher/0000-0002-7873-4229; Westman, Linda/0000-0003-4599-4996	Social Sciences and Humanities Research Council of CanadaSocial Sciences and Humanities Research Council of Canada (SSHRC); Social Sciences and Humanities Research Council (SSHRC)Social Sciences and Humanities Research Council of Canada (SSHRC)	Social Sciences and Humanities Research Council of Canada; Social Sciences and Humanities Research Council (SSHRC)	Baumann-Pauly D, 2013, J BUS ETHICS, V115, P693, DOI 10.1007/s10551-013-1827-7; Bos-Brouwers HEJ, 2010, BUS STRATEG ENVIRON, V19, P417, DOI 10.1002/bse.652; Brammer S, 2012, BUS STRATEG ENVIRON, V21, P423, DOI 10.1002/bse.717; Bridge S., 2013, UNDERSTANDING ENTERP, DOI [10.1007/978-1-137-10428-1, DOI 10.1007/978-1-137-10428-1]; Brown DL, 2010, BUS POLIT, V12, DOI 10.2202/1469-3569.1302; Burch S, …	56	11	11	1	9	WILEY	HOBOKEN	111 RIVER ST, HOBOKEN 07030-5774, NJ USA	0964-4733	1099-0836		BUS STRATEG ENVIRON	Bus. Strateg. Environ.	FEB	2019	28	2
J	Dejaeghere, J; Wiger, NP; Willemsen, LW				Dejaeghere, Joan; Wiger, Nancy Pellowski; Willemsen, Laura Wangsness			Broadening Educational Outcomes: Social Relations, Skills Development, and Employability for Youth	COMPARATIVE EDUCATION REVIEW			English	Article							ENTREPRENEURSHIP EDUCATION; SOUTH-AFRICAN; CAPABILITIES; SCHOOLS; REPRODUCTION; ACHIEVEMENT; INEQUALITY; FRAMEWORK; NETWORKS; STUDENTS	4	This article argues that, if a global development aim is to address educational inequalities, the post-2015 agenda needs to conceptually and practically broaden the focus of learning to include social relations as important processes and outcomes for achieving educational equity. We draw on Sen's capability approach and Bourdieu's forms of capital to analytically examine longitudinal data from yo…	[Dejaeghere, Joan] Univ Minnesota, Dept Org Leadership Policy & Dev, Comparat & Int Dev Educ, Minneapolis, MN 55455 USA; [Dejaeghere, Joan] MasterCard Fdn, E Lansing, MI USA; [Wiger, Nancy Pellowski] Univ Minnesota, Dept Org Leadership Policy & Dev, Minneapolis, MN 55455 USA; [Wiger, Nancy Pellowski] UNICEF, Accra, Ghana; [Wiger, Nancy Pellowski] UNICEF, Addis Ababa, Ethiopia; [Willemsen, Laura W…	Dejaeghere, J (corresponding author), Univ Minnesota, Dept Org Leadership Policy & Dev, Comparat & Int Dev Educ, Minneapolis, MN 55455 USA.; Dejaeghere, J (corresponding author), MasterCard Fdn, E Lansing, MI USA.	deja0003@umn.edu; pell0097@umn.edu; lauraw@umn.edu		DeJaeghere, Joan/0000-0002-6084-8447			Alexander RJ, 2015, INT J EDUC DEV, V40, P250, DOI 10.1016/j.ijedudev.2014.11.012; Bajaj M, 2009, INT J QUAL STUD EDUC, V22, P379, DOI 10.1080/09518390902817411; Barrett A, 2015, INT J EDUC DEV, V40, P231, DOI 10.1016/j.ijedudev.2014.11.003; Bhana D, 2006, J EDUC, P5; Bhana D, 2012, INT J EDUC DEV, V32, P352, DOI 10.1016/j.ijedudev.2011.06.002; Bonvin J.-M., 2010, ED WELFARE CAPABILIT; Bourdieu P…	57	11	11	1	29	UNIV CHICAGO PRESS	CHICAGO	1427 E 60TH ST, CHICAGO, IL 60637-2954 USA	0010-4086	1545-701X		COMP EDUC REV	Comp. Educ. Rev.	AUG	2016	60	3
J	Salamone, JC; Salamone, AB; Swindle-Reilly, K; Leung, KXC; McMahon, RE				Salamone, Joseph C.; Salamone, Ann Beal; Swindle-Reilly, Katelyn; Leung, Kelly Xiaoyu-Chen; McMahon, Rebecca E.			Grand challenge in Biomaterials-wound healing	REGENERATIVE BIOMATERIALS			English	Article						non-stinging liquid adhesive bandages			Providing improved health care for wound, burn and surgical patients is a major goal for enhancing patient well-being, in addition to reducing the high cost of current health care treatment. The introduction of new and novel biomaterials and biomedical devices is anticipated to have a profound effect on the future improvement of many deleterious health issues. This publication will discuss the de…	[Salamone, Joseph C.; Salamone, Ann Beal; Swindle-Reilly, Katelyn; Leung, Kelly Xiaoyu-Chen; McMahon, Rebecca E.] Rochal Ind LLC, 12719 Cranes Mill, San Antonio, TX 78230 USA; [Swindle-Reilly, Katelyn] Ohio State Univ, Dept Biomed Engn, Columbus, OH 43210 USA	Salamone, JC (corresponding author), Rochal Ind LLC, 12719 Cranes Mill, San Antonio, TX 78230 USA.	jcsalamone@rochalindustries.com		Swindle-Reilly, Katelyn/0000-0003-1739-0263				0	11	11	7	62	OXFORD UNIV PRESS	OXFORD	GREAT CLARENDON ST, OXFORD OX2 6DP, ENGLAND	2056-3418	2056-3426		REGEN BIOMATER	Regen. Biomater.	APR	2016	3	2
J	Baum, F; Lawless, A; MacDougall, C; Delany, T; McDermott, D; Harris, E; Williams, C				Baum, Fran; Lawless, Angela; MacDougall, Colin; Delany, Toni; McDermott, Dennis; Harris, Elizabeth; Williams, Carmel			New norms new policies: Did the Adelaide Thinkers in Residence scheme encourage new thinking about promoting well-being and Health in All Policies?	SOCIAL SCIENCE & MEDICINE			English	Article						Australia; Policy; Intersectoral action; Social determinants of health; Norm development; Policy entrepreneurs	DYNAMICS		Health systems have long been criticised for focussing on curing rather than preventing disease. This paper examines to what extent the Adelaide Thinkers in Residence (ATiR) scheme contributed to the change in norms whereby promoting well-being and a strategy to achieve this - Health in All Policies (HiAP) - was adopted by the South Australian (SA) State Government from 2007. The data presented i…	[Baum, Fran; Lawless, Angela; MacDougall, Colin; Delany, Toni] Flinders Univ S Australia, Southgate Inst Hlth Soc & Equ, Adelaide, SA 5001, Australia; [MacDougall, Colin] Flinders Univ S Australia, Discipline Publ Hlth, Adelaide, SA 5001, Australia; [McDermott, Dennis] Flinders Univ S Australia, Poche Ctr Indigenous Hlth & Wellbeing, Adelaide, SA 5001, Australia; [Harris, Elizabeth] Univ New S Wa…	Baum, F (corresponding author), Flinders Univ S Australia, Southgate Inst Hlth Soc & Equ, GPO Box 2100, Adelaide, SA 5001, Australia.	fran.baum@flinders.edu.au		Baum, Fran/0000-0002-2294-1368; MacDougall, Colin/0000-0002-1270-6823; Lawless, Angela/0000-0003-0718-8088	National Health and Medical Research CouncilNational Health and Medical Research Council of Australia [1027561]	This work was supported by the National Health and Medical Research Council (grant number 1027561). The authors declare no conflicts of interest.	ALFORD R, 1975, HLTH CARE POLITICS I; Baum F., 2015, NEW PUBLIC HLTH; Baum F, 1995, HLTH ALL S AUSTR EXP; Baum F, 2014, AUSTRALIAN PUBLIC POLICY: PROGRESSIVE IDEAS IN THE NEOLIBERAL ASCENDENCY, P187; Baum F, 2014, HEALTH PROMOT INT, V29, P130, DOI 10.1093/heapro/dau032; Blaxter M, 2010, HEALTH; Boas M., 2004, GLOBAL I DEV FRAMING; Commission on Social Determinants of Health (CSDH), 2008, CLOS GAP…	37	11	11	0	14	PERGAMON-ELSEVIER SCIENCE LTD	OXFORD	THE BOULEVARD, LANGFORD LANE, KIDLINGTON, OXFORD OX5 1GB, ENGLAND	0277-9536			SOC SCI MED	Soc. Sci. Med.	DEC	2015	147
J	Tedmanson, D; Guerin, P				Tedmanson, Deirdre; Guerin, Pauline			Enterprising social wellbeing: social entrepreneurial and strengths based approaches to mental health and wellbeing in "remote" Indigenous community contexts	AUSTRALASIAN PSYCHIATRY			English	Article						social and emotional wellbeing; social capital; social enterprise; social entrepreneurship			Objective: Social enterprises are market-based activities that provide social benefits through the direct engagement of people in productive activities. Participation in social enterprise development brings psychosocial wellbeing benefits, by strengthening family networks, enhancing trust, increasing self-reliance and social esteem and promoting cultural safety. Our objective is to explore how so…	Univ S Australia, Sch Psychol Social Work & Social Policy, Magill, SA 5072, Australia	Tedmanson, D (corresponding author), Univ S Australia, Sch Psychol Social Work & Social Policy, Magill Campus,St Bernards Rd, Magill, SA 5072, Australia.	deirdre.tedmanson@unisa.edu.au	Tedmanson, Deirdre/F-2490-2013	Tedmanson, Deirdre/0000-0002-0204-8820	Australian Research Council (ARC) in the Anangu Pitjantjatjara Yankunytjatjara Lands of South AustraliaAustralian Research Council	This paper draws on empirical insights emerging from two current Australian Research Council (ARC) funded projects in the Anangu Pitjantjatjara Yankunytjatjara Lands of South Australia: a collaborative action research ARC Linkage project (Tedmanson/Banerjee) on "Social and cultural factors in enterprise development in remote Indigenous contexts" and an ARC Discovery project (Guerin/Guerin/Tedmans…	Altman J., 2001, 226 AUSTR NAT U CTR; ARTHUR W, 1999, 190 AUSTR NAT U CTR; Fisher S., 2002, LIVELIHOOD LESS ORDI; Helliwell JF, 2004, PHILOS T R SOC B, V359, P1435, DOI 10.1098/rstb.2004.1522; Hunter E., 2004, AUSTR E J ADV MENTAL, V3; Organization for Economic Cooperation and Development, 2001, WELL BEING NAT ROL H; Pearson N., 2000, OUR RIGHT TAKE RESPO; Taylor K, 2010, HLTH CARE INDIGENOUS	8	11	11	2	41	INFORMA HEALTHCARE	NEW YORK	52 VANDERBILT AVE, NEW YORK, NY 10017 USA	1039-8562			AUSTRALAS PSYCHIATRY	Australas. Psychiatry	JUL	2011	19			1
J	Kibler, E; Wincent, J; Kautonen, T; Cacciotti, G; Obschonka, M				Kibler, Ewald; Wincent, Joakim; Kautonen, Teemu; Cacciotti, Gabriella; Obschonka, Martin			Can prosocial motivation harm entrepreneurs' subjective well-being?	JOURNAL OF BUSINESS VENTURING			English	Article						Entrepreneurship; prosocial motivation; subjective well-being	SELF-DETERMINATION THEORY; INTRINSIC MOTIVATION; CITIZENSHIP BEHAVIOR; WORK; SATISFACTION; PERFORMANCE; ORGANIZATIONS; ANTECEDENTS; PERSPECTIVE; COMPASSION	1	Entrepreneurship research on prosocial motivation has outlined its positive impact on well-being, but still little is known about its power, which may have deleterious personal consequences under certain conditions. In this study, we ask whether prosocial motivation can harm entrepreneurs' subjective well-being when they run a commercial venture. Embedded within a contingency perspective informed…	[Wincent, Joakim] Lulea Univ Technol, Lulea, Sweden; [Wincent, Joakim] Hanken Sch Econ, Helsinki, Finland; [Wincent, Joakim] Univ St Gallen, Gallen, Switzerland; [Kibler, Ewald; Kautonen, Teemu] Aalto Univ, Sch Business, Helsinki, Finland; [Kautonen, Teemu] Univ Desarrollo, Concepcion, Chile; [Cacciotti, Gabriella] Univ Warwick, Business Sch, Coventry, W Midlands, England; [Obschonka, Martin] Que…	Wincent, J (corresponding author), Lulea Univ Technol, Lulea, Sweden.	ewald.kibler@aalto.fi; joakim.wincent@ltu.se; teemu.kautonen@aalto.fi; gabriella.cacciotti@wbs.ac.uk; martin.obschonka@qut.edu.au	; Kautonen, Teemu/L-8973-2013	Obschonka, Martin/0000-0002-0853-7166; Kautonen, Teemu/0000-0001-9357-5337	Academy of FinlandAcademy of Finland	We gratefully acknowledge the financial support received from the Academy of Finland.	Aiken L. S., 1991, MULTIPLE REGRESSION; Baron RA, 2016, J MANAGE, V42, P742, DOI 10.1177/0149206313495411; BATSON CD, 1987, ADV EXP SOC PSYCHOL, V20, P65, DOI 10.1016/S0065-2601(08)60412-8; Battilana J, 2014, ACAD MANAG ANN, V8, P397, DOI 10.1080/19416520.2014.893615; Baumeister RF, 2007, CURR DIR PSYCHOL SCI, V16, P351, DOI 10.1111/j.1467-8721.2007.00534.x; Bergeron DM, 2013, J MANAGE, V39, P958…	89	10	10	10	34	ELSEVIER	AMSTERDAM	RADARWEG 29, 1043 NX AMSTERDAM, NETHERLANDS	0883-9026	1873-2003		J BUS VENTURING	J. Bus. Ventur.	JUL	2019	34	4
J	Ryff, CD				Ryff, Carol D.			Entrepreneurship and eudaimonic well-being: Five venues for new science	JOURNAL OF BUSINESS VENTURING			English	Article						Eudaimonic and hedonic well-being; Entrepreneurial types; Health; Impact on others	SELF-DETERMINATION THEORY; WORK-FAMILY SPILLOVER; POSITIVE AFFECT; UNITED-STATES; PSYCHOSOCIAL PREDICTORS; INTRINSIC MOTIVATION; ALZHEIMER-DISEASE; MENTAL-HEALTH; SOCIAL-CLASS; TRADE-OFFS		Researchers in entrepreneurial studies are increasingly interested in the psychological well-being of entrepreneurs. Approaches to well-being tend to be partitioned into hedonic and eudaimonic formulations. Most entrepreneurial studies have focused on hedonic indicators (life satisfaction, happiness, positive affect). The central objective of this essay is to examine the relevance of eudaimonic w…	[Ryff, Carol D.] Univ Wisconsin, Dept Psychol, Inst Aging, 1202 W Johnson St, Madison, WI 53706 USA	Ryff, CD (corresponding author), Univ Wisconsin, Dept Psychol, Inst Aging, 1202 W Johnson St, Madison, WI 53706 USA.	cryff@wisc.edu			John D. and Catherine T. MacArthur Foundation Research Network on Successful Midlife Development; National Institute on AgingUnited States Department of Health & Human ServicesNational Institutes of Health (NIH) - USANIH National Institute on Aging (NIA) [P01-AGO20166, U19-AGO51426]; National Center for Advancing Translational Sciences (NCATS National Institutes of Health)United States Department…	The MIDUS baseline study was supported by the John D. and Catherine T. MacArthur Foundation Research Network on Successful Midlife Development. Longitudinal extensions of MIDUS have been supported by grants for the National Institute on Aging (P01-AGO20166; U19-AGO51426). The biological research has been further supported by the following grants: M01-RR023942 (Georgetown), M01-RR0865 (UCLA) from …	Abbott RA, 2008, SOC PSYCH PSYCH EPID, V43, P679, DOI 10.1007/s00127-008-0355-8; Adler NE, 2009, AM PSYCHOL, V64, P663, DOI 10.1037/0003-066X.64.8.663; Adler NE, 1999, SOCIOECONOMIC STATUS, V896; Ahrens CJC, 2006, SEX ROLES, V55, P801, DOI 10.1007/s11199-006-9134-8; Allport GW, 1961, PATTERN GROWTH PERSO; Andrews Frank M., 1976, SOCIAL INDICATORS WE; Balot Ryan K., 2001, GREED INJUSTICE CLAS; Bau…	148	10	10	6	48	ELSEVIER	AMSTERDAM	RADARWEG 29, 1043 NX AMSTERDAM, NETHERLANDS	0883-9026	1873-2003		J BUS VENTURING	J. Bus. Ventur.	JUL	2019	34	4
J	Dijkhuizen, J; Gorgievski, M; van Veldhoven, M; Schalk, R				Dijkhuizen, Josette; Gorgievski, Marjan; van Veldhoven, Marc; Schalk, Rene			Well-Being, Personal Success and Business Performance Among Entrepreneurs: A Two-Wave Study	JOURNAL OF HAPPINESS STUDIES			English	Article						Entrepreneurial success; performance; Work engagement; Job satisfaction; General life satisfaction; Well-being; Entrepreneurship; Small business	WORK ENGAGEMENT; JOB-SATISFACTION; POSITIVE PSYCHOLOGY; HAPPINESS; PEOPLE; MOTIVATION; ATTITUDES; EMOTIONS; BROADEN; SECTOR		This two-wave longitudinal study among 121 entrepreneurs in The Netherlands investigated bi-directional relationships between entrepreneurs' well-being and performance. Results of Smart PLS analyses showed positive well-being at Time 1 (work engagement; life satisfaction; and job satisfaction) predicted subjective entrepreneurial success 2years later, both as indicated by entrepreneurs' reports o…	[Dijkhuizen, Josette; van Veldhoven, Marc; Schalk, Rene] Tilburg Univ, Dept Human Resource Studies, POB 90153, NL-5000 LE Tilburg, Netherlands; [Dijkhuizen, Josette] Maastricht Sch Management, Endepolsdomein 150, NL-6229 EP Maastricht, Netherlands; [Gorgievski, Marjan] Erasmus Univ, Dept Work & Org Psychol, POB 1738, NL-3000 DR Rotterdam, Netherlands	Dijkhuizen, J (corresponding author), Tilburg Univ, Dept Human Resource Studies, POB 90153, NL-5000 LE Tilburg, Netherlands.; Dijkhuizen, J (corresponding author), Maastricht Sch Management, Endepolsdomein 150, NL-6229 EP Maastricht, Netherlands.	info@josettedijkhuizen.nl; gorgievski@fsw.eur.nl; m.j.p.m.vanVeldhoven@uvt.nl; m.j.d.schalk@uvt.nl	Schalk, Rene/F-3398-2013; van Veldhoven, Marc/F-7661-2013	Schalk, Rene/0000-0003-1721-8877; van veldhoven, marc/0000-0001-5762-7945			Andersson P., 2008, J SOCIO-ECON, V37, P213, DOI DOI 10.1016/J.S0CEC.2007.03.003; Bakker A. B., 2007, J MANAGERIAL PSYCHOL, V22, P309, DOI DOI 10.1108/02683940710733115; Bakker A. B., 2008, CAREER DEV INT, V13, P209, DOI DOI 10.1108/13620430810870476; Bakker AB, 2011, OXFORD HDB POSITIVE, DOI DOI 10.1093/OXFORDHB/9780199734610.013.0014; Bakker AB, 2008, WORK STRESS, V22, P187, DOI 10.1080/0267837…	92	10	10	9	44	SPRINGER	DORDRECHT	VAN GODEWIJCKSTRAAT 30, 3311 GZ DORDRECHT, NETHERLANDS	1389-4978	1573-7780		J HAPPINESS STUD	J. Happiness Stud.	DEC	2018	19	8
J	Macaulay, B; Roy, MJ; Donaldson, C; Teasdale, S; Kay, A				Macaulay, Bobby; Roy, Michael J.; Donaldson, Cam; Teasdale, Simon; Kay, Alan			Conceptualizing the health and well-being impacts of social enterprise: a UK-based study	HEALTH PROMOTION INTERNATIONAL			English	Article						UK; social enterprise; public health; conceptual modelling	PROMOTION; ENTREPRENEURS; MODEL		Social enterprises-businesses that work for social benefit rather than for the maximization of financial returns to shareholders or owners-could potentially prove to be an innovative and sustainable way of tackling 'upstream' social determinants of health. However, empirical work focusing upon how, and to what extent, social enterprise-led activity may impact upon health and well-being is still r…	[Macaulay, Bobby; Roy, Michael J.; Donaldson, Cam; Teasdale, Simon; Kay, Alan] Glasgow Caledonian Univ, Yunus Ctr Social Business & Hlth, Cowcaddens Rd, Glasgow G4 0BA, Lanark, Scotland; [Roy, Michael J.; Teasdale, Simon] Glasgow Caledonian Univ, Glasgow Sch Business & Soc, Cowcaddens Rd, Glasgow G4 0BA, Lanark, Scotland	Macaulay, B (corresponding author), Glasgow Caledonian Univ, Yunus Ctr Social Business & Hlth, Cowcaddens Rd, Glasgow G4 0BA, Lanark, Scotland.	bobby.macaulay@gcu.ac.uk	Teasdale, Simon/N-9719-2018; Roy, Michael J./H-5749-2019	Teasdale, Simon/0000-0002-2452-2650; Roy, Michael J./0000-0002-1834-0826; Macaulay, Bobby/0000-0003-1163-858X; Donaldson, Cam/0000-0003-4670-5340	Medical Research CouncilMedical Research Council UK (MRC); Economic and Social Research CouncilEconomic & Social Research Council (ESRC) [MR/L003287/1]	This work was supported by the Medical Research Council and the Economic and Social Research Council [grant number MR/L003287/1].	Amin A., 2003, PLACING SOCIAL EC; Arvidson M, 2014, VOLUNTAS, V25, P869, DOI 10.1007/s11266-013-9373-6; Beckfield J, 2009, EPIDEMIOL REV, V31, P152, DOI 10.1093/epirev/mxp002; Boswell J, 2009, HLTH SOCIAL ENTERPRI; Catford J, 1998, HEALTH PROMOT INT, V13, P95, DOI 10.1093/heapro/13.2.95; Corbin J, 2007, BASICS QUALITATIVE R; Curtis A., 2015, POLITICS SOCIAL ENTE; Dahlgren G., 1991, POLICIES STRAT…	38	10	10	1	7	OXFORD UNIV PRESS	OXFORD	GREAT CLARENDON ST, OXFORD OX2 6DP, ENGLAND	0957-4824	1460-2245		HEALTH PROMOT INT	Health Promot. Int.	OCT	2018	33	5
J	Foley, C				Foley, Carmel			The art of wasting time: sociability, friendship, community and holidays	LEISURE STUDIES			English	Article						slow tourism; rational recreation; time sense; holidays; sociability; friendship	WOMENS LEISURE; CONSUMPTION		Slow tourism is motivated by the desire for personal and communal well-being. It emerged as an antidote to the fast-paced imperatives of global capitalism that urge the entrepreneurial self to speed up and work harder to achieve and demonstrate desired social status. The entrepreneurial self can be understood in the contexts of neoliberalism and the class- and gender-based histories of time-thrif…	[Foley, Carmel] Univ Technol Sydney, Ctr Contemporary Civil Soc, POB 123, Broadway, NSW 2007, Australia	Foley, C (corresponding author), Univ Technol Sydney, Ctr Contemporary Civil Soc, POB 123, Broadway, NSW 2007, Australia.	carmel.foley@uts.edu.au	Foley, Carmel/AAY-9038-2020	Foley, Carmel/0000-0002-8851-9119			Albrecht J., 2012, RECONSTRUCTING INDIV; Arai S., 2003, Leisure Studies, V22, P185, DOI 10.1080/026143603200075489; Bailey Peter, 1978, LEISURE CLASS VICTOR; Brooker E, 2014, J VACAT MARK, V20, P335, DOI 10.1177/1356766714532464; Brueggemann W. G., 2002, PRACTICE MACROSOCIAL; Burstyn Joan N., 1980, VICTORIAN ED IDEAL W; Caldicott R. W., 2013, Journal of Vacation Marketing, V19, P117, DOI 10.1177/…	55	10	10	1	15	ROUTLEDGE JOURNALS, TAYLOR & FRANCIS LTD	ABINGDON	2-4 PARK SQUARE, MILTON PARK, ABINGDON OX14 4RN, OXON, ENGLAND	0261-4367	1466-4496		LEISURE STUD	Leis. Stud.		2017	36	1
J	Liang, JC; Goetz, SJ				Liang, Jiaochen; Goetz, Stephan J.			Self-employment and trade shock mitigation	SMALL BUSINESS ECONOMICS			English	Article						Self-employment; Entrepreneurship; Trade shocks; Economic resilience	EUROPEAN UNEMPLOYMENT PROP; NATIONAL LABOR-MARKETS; ECONOMIC-GROWTH; BUSINESS FORMATION; AMERICAN WAGES; US; ENTREPRENEURSHIP; LIBERALIZATION; COMPETITION; ADJUSTMENT		This paper investigates the moderating effects of entrepreneurial activity on the impact of trade penetration. Entrepreneurs may help to mitigate adverse trade shocks through several mechanisms, i.e., more flexible output structure, diversified economic portfolio, and higher knowledge spillovers from trade-induced R&D activities. Our empirical work embeds the analysis of entrepreneurship, measure…	[Liang, Jiaochen] Penn State Univ, 311 Armsby, University Pk, PA 16802 USA; [Goetz, Stephan J.] Penn State Univ, Northeast Reg Ctr Rural Dev, 207E Armsby, University Pk, PA 16802 USA	Liang, JC (corresponding author), Penn State Univ, 311 Armsby, University Pk, PA 16802 USA.	jzl214@psu.edu		Goetz, Stephan/0000-0003-4529-552X	USDA NIFAUnited States Department of Agriculture (USDA) [2012-70002-19385, 2014-51150-22094]	This work was funded in part under USDA NIFA grants 2012-70002-19385 and 2014-51150-22094, which the authors gratefully acknowledge. An earlier version of this paper was presented at the 2014 AAEA Annual Meeting in Minneapolis, MN. We thank session participants and especially moderator Mark Gibson for valuable comments. In addition, we are very grateful for constructive comments from the editor, …	Acs ZJ, 2005, SMALL BUS ECON, V24, P323, DOI 10.1007/s11187-005-1998-4; Acs ZJ, 2007, SMALL BUS ECON, V28, P109, DOI 10.1007/s11187-006-9012-3; Acs ZJ, 2013, SMALL BUS ECON, V41, P757, DOI 10.1007/s11187-013-9505-9; Autor DH, 2013, AM ECON REV, V103, P2121, DOI 10.1257/aer.103.6.2121; Bernard AB, 2003, AM ECON REV, V93, P1268, DOI 10.1257/000282803769206296; BERNARD AB, 1995, BROOKINGS PAP ECO AC…	49	10	10	3	16	SPRINGER	DORDRECHT	VAN GODEWIJCKSTRAAT 30, 3311 GZ DORDRECHT, NETHERLANDS	0921-898X	1573-0913		SMALL BUS ECON	Small Bus. Econ. Group	JAN	2016	46	1
J	Jennings, L; Shore, D; Strohminger, N; Allison, B				Jennings, Larissa; Shore, Deborah; Strohminger, Nancy; Allison, Burgundi			Entrepreneurial development for U.S. minority homeless and unstably housed youth: A qualitative inquiry on value, barriers, and impact on health	CHILDREN AND YOUTH SERVICES REVIEW			English	Article						Entrepreneurship; Microenterprise; Homelessness; Health; Youth; African-American	SOCIAL ENTERPRISE INTERVENTION; HIV PREVENTION INTERVENTION; RISK BEHAVIOR; MICROENTERPRISE DEVELOPMENT; ECONOMIC EMPOWERMENT; YOUNG-ADULTS; REDUCE RISK; WOMEN; EMPLOYMENT; MICROFINANCE		Background: Homeless and unstably housed youth in the U.S. have high rates of unemployment and often rely on survival strategies that negatively impact their economic, emotional, and physical health. While integrated health and entrepreneurial development initiatives targeting the poor have been successfully implemented in developing countries, little is known regarding interests in similar initi…	[Jennings, Larissa] Johns Hopkins Bloomberg Sch Publ Hlth, Dept Int Hlth, Social & Behav Intervent Program, Baltimore, MD 21205 USA; [Shore, Deborah] Sasha Bruce Youthwork, Washington, DC USA; [Strohminger, Nancy] Univ Maryland, Sch Social Work, Baltimore, MD 21201 USA; [Allison, Burgundi] AIRS City Steps, Baltimore, MD USA	Jennings, L (corresponding author), Johns Hopkins Bloomberg Sch Publ Hlth, Dept Int Hlth, Social & Behav Intervent Program, 615 N Wolfe St,Room E5038, Baltimore, MD 21205 USA.	ljennin6@jhu.edu; dshore@sashabruce.org; nstrohminger@ssw.umaryland.edu; burgundi@citysteps.org			Social and Behavioral Interventions Program of the Johns Hopkins Bloomberg School of Public Health	The authors wish to thank all of the youth who participated in the study, in addition to the CBO program managers and staff, including Monifa Wilson, Margie Baynard, Crystal Phillips, Vera Johnson, George Johnson, Eric Collins, LaShelle Richmond, DeAnna McCall, Katrina Burt, Mercides Daley-Skipwith, and Kenneth Walker, Jr., who made this research possible. Special thanks as well to Rachel Locke, …	Agbenyiga DL, 2008, J COMMUNITY PRACT, V16, P423, DOI 10.1080/10705420802473642; Altena AM, 2010, AM J PREV MED, V38, P637, DOI 10.1016/j.amepre.2010.02.017; Arnold MP, 2011, AIDS BEHAV, V15, P499, DOI 10.1007/s10461-009-9665-4; Astone N. M., 2011, HOMELESS YOUNG PEOPL; Bantchevska Denitza, 2008, Journal of Human Ecology, V23, P285; Barman-Adhikari A, 2014, EVAL PROGRAM PLANN, V45, P90, DOI 10.10…	72	10	10	0	44	PERGAMON-ELSEVIER SCIENCE LTD	OXFORD	THE BOULEVARD, LANGFORD LANE, KIDLINGTON, OXFORD OX5 1GB, ENGLAND	0190-7409	1873-7765		CHILD YOUTH SERV REV	Child. Youth Serv. Rev.	FEB	2015	49
J	Sessa, C; Ricci, A				Sessa, Carlo; Ricci, Andrea			The world in 2050 and the New Welfare scenario	FUTURES			English	Article						Paradigm shifts; Foresight methods; Scenario building; Steady state economy; Global and local democracy; Wellbeing and sustainability metrics; Lifestyle change			The PASHMINA (paradigm shifts modeling and innovative approaches) project grew out of the need to improve our understanding of the paradigm shift in the energy-transport-landuse nexus and, more broadly, in world development. In envisioning the world at 2050, we envisaged future growth in four possible directions: growth without limits, growth within limits, stagnation, and New Welfare. The scenar…	[Sessa, Carlo; Ricci, Andrea] Inst Studies Integrat Syst, Rome, Italy	Sessa, C (corresponding author), Inst Studies Integrat Syst, Rome, Italy.	mc7920@mclink.it					Costanza R., 2007, SUSTAINABILITY COLLA; Daly H., 1991, STEADY STATE EC; Diamond J. M., 2005, COLLAPSE SOC CHOOSE; Pauli G.A., 2010, BLUE EC 10 YEARS 100; Sale K., 2000, DWELLERS LAND BIOREG; Woodin M., 2004, GREEN ALTERNATIVES G	6	10	10	2	100	ELSEVIER SCI LTD	OXFORD	THE BOULEVARD, LANGFORD LANE, KIDLINGTON, OXFORD OX5 1GB, OXON, ENGLAND	0016-3287	1873-6378		FUTURES	Futures	APR	2014	58
J	Sohn, SY; Lee, AS				Sohn, So Young; Lee, Ann Sung			Bayesian network analysis for the dynamic prediction of early stage entrepreneurial activity index	EXPERT SYSTEMS WITH APPLICATIONS			English	Article						Bayesian network; GEM; Early stage entrepreneurial activity Index; Forecasting	ASPIRATIONS; INFORMATION	1	Entrepreneurship plays a critical role for the development and well-being of society. Illustration of its dynamic relationship with entrepreneurial attitudes and aspirations can provide a guideline for the cause of such activities. However, a time-lagged causal relationship among these concepts has not yet been established. In this study, we examine a dynamic relationship among early stage entrep…	[Sohn, So Young; Lee, Ann Sung] Yonsei Univ, Dept Informat & Ind Engn, Seoul 120749, South Korea	Sohn, SY (corresponding author), Yonsei Univ, Dept Informat & Ind Engn, 134 Shinchon Dong, Seoul 120749, South Korea.	sohns@yonsei.ac.kr			National Research Foundation of KoreaNational Research Foundation of Korea; Korean GovernmentKorean Government [NRF-2011-327-B00324]	This work was supported by the National Research Foundation of Korea Grant funded by the Korean Government (NRF-2011-327-B00324). We also appreciate Yong Han Ju for his comments on our work. Permission to use excerpts/tables from Global Entrepreneurship Monitor: 2008 and 2009 Executive Reports, which appear here, has been granted by the copyright holders. The GEM is an international consortium an…	Acs Z. J., 2009, JENA EC RES PAPERS, V2009, P028; AMIT R, 1995, J BUS VENTURING, V10, P95, DOI 10.1016/0883-9026(94)00017-O; Autio E, 2000, ACAD MANAGE J, V43, P909, DOI 10.2307/1556419; Autio E., 2010, FRONTIERS ENTREPRENE, V30; Bacciu D., COMPUTATION IN PRESS; Barrientos MA, 1998, EXPERT SYST APPL, V15, P287, DOI 10.1016/S0957-4174(98)00036-0; Bosma N., 2012, GEM WORKING PAPER SE, V12-01; BOSMA…	46	10	10	0	54	PERGAMON-ELSEVIER SCIENCE LTD	OXFORD	THE BOULEVARD, LANGFORD LANE, KIDLINGTON, OXFORD OX5 1GB, ENGLAND	0957-4174	1873-6793		EXPERT SYST APPL	Expert Syst. Appl.	AUG	2013	40	10
J	Peters, M; Kallmuenzer, A; Buhalis, D				Peters, Mike; Kallmuenzer, Andreas; Buhalis, Dimitrios			Hospitality entrepreneurs managing quality of life and business growth	CURRENT ISSUES IN TOURISM			English	Article						quality of life; business growth; wellbeing; entrepreneurship; hospitality	SOCIOEMOTIONAL WEALTH; STYLE ENTREPRENEURSHIP; EMPIRICAL-ANALYSIS; RURAL TOURISM; FAMILY FIRMS; SATISFACTION; PERFORMANCE; COMPETENCES; COMPETITIVENESS; DESTINATION		The hospitality industry is dominated by small- and medium-sized enterprises (SMEs).They are often led by entrepreneurs who face the challenge of simultaneously managing business decisions and their own wellbeing. The competitiveness of tourism destinations often depends on these entrepreneurs and therefore understanding their motivations and work patterns is critical. Research on individual well…	[Peters, Mike; Kallmuenzer, Andreas] Univ Innsbruck, Dept Strateg Management Mkt & Tourism, Sch Management, Karl Rahner Pl 3, A-6020 Innsbruck, Austria; [Buhalis, Dimitrios] Bournemouth Univ, Fac Management, D202,Talbot Campus, Poole BH12 5BB, Dorset, England	Kallmuenzer, A (corresponding author), Univ Innsbruck, Dept Strateg Management Mkt & Tourism, Sch Management, Karl Rahner Pl 3, A-6020 Innsbruck, Austria.	andreas.kallmuenzer@uibk.ac.at	Buhalis, Dimitrios/C-2045-2008	Buhalis, Dimitrios/0000-0001-9148-6090			Ahmad SZ, 2015, CURR ISSUES TOUR, V18, P328, DOI 10.1080/13683500.2014.934211; Aiken L. S., 1991, MULTIPLE REGRESSION; Ateljevic I., 2000, Journal of Sustainable Tourism, V8, P378, DOI 10.1080/09669580008667374; Bachinger M, 2010, LEBENSQUALITAT STAND, P13; Berrone P, 2012, FAM BUS REV, V25, P258, DOI 10.1177/0894486511435355; BIRLEY S, 1990, STRATEGIC MANAGE J, V11, P535, DOI 10.1002/smj.4250110…	94	9	9	6	26	ROUTLEDGE JOURNALS, TAYLOR & FRANCIS LTD	ABINGDON	2-4 PARK SQUARE, MILTON PARK, ABINGDON OX14 4RN, OXON, ENGLAND	1368-3500	1747-7603		CURR ISSUES TOUR	Curr. Issues Tour.	37530	2019	22	16
J	Bhuiyan, MF; Ivlevs, A				Bhuiyan, Muhammad Faress; Ivlevs, Artjoms			Micro-entrepreneurship and subjective well-being: Evidence from rural Bangladesh	JOURNAL OF BUSINESS VENTURING			English	Article						Microcredit; Entrepreneurship; Life satisfaction; Happiness; Depression; Worry; Female empowerment; Bangladesh	LIFE SATISFACTION; SELF-EMPLOYMENT; CREDIT PROGRAMS; NECESSITY ENTREPRENEURSHIP; WOMENS EMPOWERMENT; POVERTY REDUCTION; MICROCREDIT; MICROFINANCE; INNOVATION; HAPPINESS		Microcredit has long been hailed as a powerful tool to promote livelihoods and reduce poverty through entrepreneurship. However, its impacts on peoples subjective well-being remain underexplored. We present a unified theoretical framework for analyzing the effect of microcredit-enabled entrepreneurship on overall life satisfaction a key manifestation of subjective well-being. Empirically, we appl…	[Bhuiyan, Muhammad Faress] Carleton Coll, Dept Econ, 1 North Coll St, Northfield, MN 55057 USA; [Ivlevs, Artjoms] Univ West England, Bristol Business Sch, Bristol BS16 1QY, Avon, England; [Ivlevs, Artjoms] IZA, Bonn, Germany	Ivlevs, A (corresponding author), Univ West England, Bristol Business Sch, Bristol BS16 1QY, Avon, England.; Ivlevs, A (corresponding author), IZA, Bonn, Germany.	fbhuiyan@carleton.edu; a.ivlevs@uwe.ac.uk		Bhuiyan, Muhammad/0000-0001-8620-8264			Abdel-Khalek AM, 2006, SOC BEHAV PERSONAL, V34, P139, DOI 10.2224/sbp.2006.34.2.139; Aggarwal R, 2015, INT BUS REV, V24, P55, DOI 10.1016/j.ibusrev.2014.05.008; Ahmed SM, 2001, WORLD DEV, V29, P1957, DOI 10.1016/S0305-750X(01)00069-9; Ali HMA, 2014, DEV PRACT, V24, P327, DOI 10.1080/09614524.2014.896877; [Anonymous], 2016, POV SHAR PROSP 2016; Armendariz B, 2010, EC MICROFINANCE; Awaworyi Churchi…	130	9	9	4	18	ELSEVIER	AMSTERDAM	RADARWEG 29, 1043 NX AMSTERDAM, NETHERLANDS	0883-9026	1873-2003		J BUS VENTURING	J. Bus. Ventur.	JUL	2019	34	4
J	Pla-Julian, I; Guevara, S				Pla-Julian, Isabel; Guevara, Sandra			Is circular economy the key to transitioning towards sustainable development? Challenges from the perspective of care ethics	FUTURES			English	Article						Sustainable development; Circular economy; Ethic of care; Gender economics; Patterns of production and consumption; Public ethic; Future studies			The Sustainable Development Goals represent a global consensus on the urgency to preserve the conditions that make life possible on this planet and ensure a future of wellbeing for humanity. Transforming consumption and production processes is a fundamental priority of this development agenda. Circular Economy has emerged as an alternative model, given its potential for value creation, while gene…	[Pla-Julian, Isabel] Univ Valencia, Appl Econ Dept, Campus Tarongers, Valencia, Spain; [Guevara, Sandra] C Comunidad Madrid, Navarra 31010, Spain	Pla-Julian, I (corresponding author), Univ Valencia, Appl Econ Dept, Campus Tarongers, Valencia, Spain.	Isabel.Pla@uv.es; sandraguevaram@gmail.com	Pla-Julian, Isabel/Y-8650-2019	Pla-Julian, Isabel/0000-0002-3665-3834			ACKER J, 1992, GENDERING ORG ANAL; Acker J, 1990, GENDER SOC, V4, P139, DOI 10.1177/089124390004002002; Arthur B., 2013, COMPLEXITY EC DIFFER; Baker Susan, 2002, POLITICS SUSTAINABLE; Becker GS, 1991, TREATISE FAMILY; Benn S, 2014, UNDERST ORGAN CHANG, P1; Berkes F, 2003, NAVIGATING SOCIAL EC; Blewitt John., 2015, UNDERSTANDING SUSTAI; Boulding K., 1966, EC COMING SPACESHIP; Braungart M., 2002, C…	71	9	9	6	30	ELSEVIER SCI LTD	OXFORD	THE BOULEVARD, LANGFORD LANE, KIDLINGTON, OXFORD OX5 1GB, OXON, ENGLAND	0016-3287	1873-6378		FUTURES	Futures	JAN	2019	105
J	Gawke, JC; Gorgievski, MJ; Bakker, AB				Gawke, Jason C.; Gorgievski, Marjan J.; Bakker, Arnold B.			Personal Costs and Benefits of Employee Intrapreneurship: Disentangling the Employee Intrapreneurship, Well-Being, and Job Performance Relationship	JOURNAL OF OCCUPATIONAL HEALTH PSYCHOLOGY			English	Article						BIS-BAS; job performance; moderated mediation; proactive work behavior; work engagement	WORK ENGAGEMENT; CORPORATE ENTREPRENEURSHIP; CONTEXTUAL PERFORMANCE; CITIZENSHIP BEHAVIOR; RESOURCES; DEMANDS; MODEL; BURNOUT; SENSITIVITY; HYPOTHESIS		Ample studies have confirmed the benefits of intrapreneurship (i.e., employee behaviors that contribute to new venture creation and strategic renewal activities) for firm performance, but research on the personal costs and benefits of engaging in intrapreneurial activities for employees is lacking. Building on job demands-resources and reinforcement sensitivity theories, we examined how employees…	[Gawke, Jason C.; Gorgievski, Marjan J.; Bakker, Arnold B.] Erasmus Univ, Dept Work & Org Psychol, Mandeville Bldg,Room T16-16,POB 1738, NL-3000 DR Rotterdam, Netherlands; [Bakker, Arnold B.] Univ Johannesburg, Johannesburg, South Africa	Gawke, JC (corresponding author), Erasmus Univ, Dept Work & Org Psychol, Mandeville Bldg,Room T16-16,POB 1738, NL-3000 DR Rotterdam, Netherlands.	gawke@fsw.eur.nl	Bakker, Arnold B./F-8494-2010	Bakker, Arnold B./0000-0003-1489-1847; Gawke, Jason/0000-0002-7669-0453	Foundation for Labor Market and Education of the Dutch Central Public Administration	This research was supported by the Foundation for Labor Market and Education of the Dutch Central Public Administration.	Anderson AR, 2002, ENTREP REGION DEV, V14, P193, DOI 10.1080/08985620110112079; Antoncic B., 2003, J SMALL BUSINESS ENT, V10, P7, DOI DOI 10.1108/14626000310461187; Bakker A. B., 2007, J MANAGERIAL PSYCHOL, V22, P309, DOI DOI 10.1108/02683940710733115; Bakker AB, 2014, WORK WELLBEING WELLB, DOI DOI 10.1002/9781118539415.WBWELL019; Bakker AB, 2017, J OCCUP HEALTH PSYCH, V22, P273, DOI 10.1037/ocp0…	75	9	9	10	69	AMER PSYCHOLOGICAL ASSOC	WASHINGTON	750 FIRST ST NE, WASHINGTON, DC 20002-4242 USA	1076-8998	1939-1307		J OCCUP HEALTH PSYCH	J. Occup. Health Psychol.	OCT	2018	23	4
J	Spinelli, R; Magagnotti, N; Jessup, E; Soucy, M				Spinelli, Raffaele; Magagnotti, Natascia; Jessup, Eric; Soucy, Michel			Perspectives and challenges of logging enterprises in the Italian Alps	FOREST POLICY AND ECONOMICS			English	Article							FORESTRY CONTRACTORS; PERFORMANCE; BUSINESSES; LOGGERS; MACHINE; BIOMASS; HEALTH; SECTOR; WOOD		This study surveyed logging businesses in the Italian Alps to obtain a first detailed description of their current financial wellbeing, of their future intentions and of the success factors and obstacles perceived by the entrepreneurs. Answers from 322 respondents suggest a relatively stable group of enterprises, where the large majority (ca. 90%) intends to stay in business, but where investment…	[Spinelli, Raffaele; Magagnotti, Natascia] CNR IVALSA, Via Madonna Piano 10, I-50019 Sesta Fiorentino, Italy; [Jessup, Eric] Washington State Univ, Sch Econ Sci, 301 Hulbert Hall, Pullman, WA 99164 USA; [Soucy, Michel] Univ Moncton, Campus dEdmundston,165 Blvd Hebert, Edmundston, NB E3V 2S8, Canada	Spinelli, R (corresponding author), CNR IVALSA, Via Madonna Piano 10, I-50019 Sesta Fiorentino, Italy.	spinelli@ivalsa.cnr.it; magagnotti@ivalsa.cnr.it; eric_jessup@wsu.edu; michel.soucy@umoncton.ca		Magagnotti, Natascia/0000-0003-3508-514X; Soucy, Michel/0000-0003-0531-5549	Regione Autonoma Friuli-Venezia Giulia [CUP D71J10000220002]	This study is a part of the project "Organization and rationalization of logging operations" funded by Regione Autonoma Friuli-Venezia Giulia (CUP D71J10000220002), Servizio Gestione Forestale e Produzione Legnosa. Special thanks are due to Dr. G. Aminti, A. De Crignis, M. Gianella and A. Melesi for their precious assistance with data collection and compilation, and to Dr. H. Borchert for his mos…	Ackerman P., 2014, INT J FOREST ENG, V25, P75, DOI [10.1080/14942119.2014.903711, DOI 10.1080/14942119.2014.903711]; Allen TT, 2008, FOREST PROD J, V58, P27; Allred SB, 2009, FOREST PROD J, V59, P31; Baker SA, 2008, SOUTH J APPL FOR, V32, P60, DOI 10.1093/sjaf/32.2.60; Barrett S. M., 2014, Forest Products Journal, V64, P265; Barrett SM, 2013, P 2013 COUNC FOR ENG; Blinn CR, 2015, FOREST SCI, V61,…	41	9	9	0	6	ELSEVIER	AMSTERDAM	RADARWEG 29, 1043 NX AMSTERDAM, NETHERLANDS	1389-9341	1872-7050		FOREST POLICY ECON	Forest Policy Econ.	JUL	2017	80
J	Welsh, DHB; Kaciak, E; Thongpapanl, N				Welsh, Dianne H. B.; Kaciak, Eugene; Thongpapanl, Narongsak			Influence of stages of economic development on women entrepreneurs' startups	JOURNAL OF BUSINESS RESEARCH			English	Article						Women entrepreneurship; Economic development	FAMILY; BUSINESS; FEMALE; ENTRY; PERFORMANCE; INNOVATION; INTERFACE; SYSTEMS; GENDER	2	Women entrepreneurs add to the economic well-being of countries. This study examines whether stages of economic development (SEDs) influence women entrepreneurs similarly across national settings. This study approaches the environments in which women entrepreneurs launch their businesses from two perspectives - family support and personal problems - in Canada, China, Egypt, Morocco, Poland, South…	[Welsh, Dianne H. B.] Univ N Carolina, Bryan Sch Business & Econ, Greensboro, NC 27412 USA; [Kaciak, Eugene; Thongpapanl, Narongsak] Brock Univ, Goodman Sch Business, St Catharines, ON, Canada; [Thongpapanl, Narongsak] Chiang Mai Univ, Res Adm Ctr, Chiang Mai, Thailand; [Kaciak, Eugene] Kozminski Univ, Dept Int Business, Warsaw, Poland	Welsh, DHB (corresponding author), Univ N Carolina, Bryan Sch Business & Econ, Greensboro, NC 27412 USA.	dhwelsh@uncg.edu; ekaciak@brocku.ca; nthongpa@brocku.ca	Kaciak, Eugene/AAB-7926-2020	Kaciak, Eugene/0000-0002-7089-0729			Acs ZJ, 2008, SMALL BUS ECON, V31, P219, DOI 10.1007/s11187-008-9135-9; Acs ZJ, 2014, RES POLICY, V43, P476, DOI 10.1016/j.respol.2013.08.016; Ahl H, 2006, ENTREP THEORY PRACT, V30, P595, DOI 10.1111/j.1540-6520.2006.00138.x; Aldrich HE, 2003, J BUS VENTURING, V18, P573, DOI 10.1016/S0883-9026(03)00011-9; Arregle JL, 2007, J MANAGE STUD, V44, P73, DOI 10.1111/j.1467-6486.2007.00665.x; Batsakis GK…	43	9	9	5	109	ELSEVIER SCIENCE INC	NEW YORK	STE 800, 230 PARK AVE, NEW YORK, NY 10169 USA	0148-2963	1873-7978		J BUS RES	J. Bus. Res.	NOV	2016	69	11
J	Green, H; Broun, P; Cakmak, I; Condon, L; Fedoroff, N; Gonzalez-Valero, J; Graham, I; Lewis, J; Moloney, M; Oniang'o, RK; Sanginga, N; Shewry, P; Roulin, A				Green, Hilary; Broun, Pierre; Cakmak, Ismail; Condon, Liam; Fedoroff, Nina; Gonzalez-Valero, Juan; Graham, Ian; Lewis, Josette; Moloney, Maurice; Oniang'o, Ruth K.; Sanginga, Nteranya; Shewry, Peter; Roulin, Anne			Planting seeds for the future of food	JOURNAL OF THE SCIENCE OF FOOD AND AGRICULTURE			English	Article						agriculture; soil; plant science; nutrition security; food security; sustainability	ZINC FERTILIZATION; SOIL MICROBIOME; WHEAT; BIOFORTIFICATION; PHOSPHORUS; MAIZE; RICE; IRON; BIOAVAILABILITY; ENRICHMENT		The health and wellbeing of future generations will depend onhumankind's ability to deliver sufficient nutritious food to a world population in excess of 9 billion. Feeding this many people by 2050 will require science-based solutions that address sustainable agricultural productivity and enable healthful dietary patterns in a more globally equitable way. This topic was the focus of a multi-disci…	[Green, Hilary; Roulin, Anne] Nestec Ltd, Dept Nutr Hlth & Wellness & Sustainabil, CH-1800 Vevey, Switzerland; [Broun, Pierre] Nestle Res & Dev Ctr, Tours, France; [Cakmak, Ismail] Sabanci Univ, Fac Engn & Nat Sci, TR-34956 Istanbul, Turkey; [Condon, Liam] Bayer CropSci AG, D-40789 Monheim, Germany; [Fedoroff, Nina] Penn State Univ, Dept Biol, University Pk, PA 16802 USA; [Gonzalez-Valero, Juan] …	Green, H (corresponding author), Nestec Ltd, Dept Nutr Hlth & Wellness & Sustainabil, CH-1800 Vevey, Switzerland.	hilary.green@nestle.com	Cakmak, Ismail/A-2257-2009	Cakmak, ismail/0000-0002-3183-5524; Green, Hilary/0000-0002-1899-9567	Biotechnology and Biological Sciences Research CouncilBiotechnology and Biological Sciences Research Council (BBSRC) [BBS/E/C/00005206, BB/J011851/1] Funding Source: Researchfish		Aciksoz SB, 2011, PLANT SOIL, V349, P215, DOI 10.1007/s11104-011-0863-2; Al-Babili S, 2005, TRENDS PLANT SCI, V10, P565, DOI 10.1016/j.tplants.2005.10.006; Alexandratos N, 2012, 20121203 ESA, P12, DOI DOI 10.1016/S0264-8377(03)00047-4; Alfthan G, 2015, J TRACE ELEM MED BIO, V31, P142, DOI 10.1016/j.jtemb.2014.04.009; Barfoot Peter, 2014, GM Crops Food, V5, P149, DOI 10.4161/gmcr.28449; Bohra A, 2…	55	9	10	1	88	WILEY	HOBOKEN	111 RIVER ST, HOBOKEN 07030-5774, NJ USA	0022-5142	1097-0010		J SCI FOOD AGR	J. Sci. Food Agric.	11018	2016	96	5
J	Alkire, L; Mooney, C; Gur, FA; Kabadayi, S; Renko, M; Vink, J				Alkire (nee Nasr), Linda; Mooney, Christine; Gur, Furkan A.; Kabadayi, Sertan; Renko, Maija; Vink, Josina			Transformative service research, service design, and social entrepreneurship An interdisciplinary framework advancing wellbeing and social impact	JOURNAL OF SERVICE MANAGEMENT			English	Article						Wellbeing; Social entrepreneurship; Service organizations; Service design; Social impact; Transformative service research	IN-SERVICE; RESEARCH PRIORITIES; BUSINESS MODELS; VALUE CREATION; INNOVATION; PERFORMANCE; COMPASSION; ENTERPRISE; MOTIVATION; BRICOLAGE		Purpose The purpose of this paper is to provide an interdisciplinary framework bridging service design and social entrepreneurship with transformative service research (TSR) to create greater synergetic effects to advance wellbeing and drive social impact. Design/methodology/approach This research provides an interdisciplinary review and synthesis of literature to establish a basis for a conceptu…	[Alkire (nee Nasr), Linda] Texas State Univ, Dept Mkt, San Marcos, TX 78666 USA; [Mooney, Christine; Gur, Furkan A.] Northern Illinois Univ, De Kalb, IL 60115 USA; [Kabadayi, Sertan] Fordham Univ, Gabelli Sch Business, Dept Mkt, New York, NY 10023 USA; [Renko, Maija] Depaul Univ, Driehaus Coll Business, Chicago, IL 60604 USA; [Vink, Josina] Karlstads Univ, CTF Serv Res Ctr, Karlstad, Sweden; [Vin…	Alkire, L (corresponding author), Texas State Univ, Dept Mkt, San Marcos, TX 78666 USA.	linda.alkire@txstate.edu	Renko, Maija/X-4691-2019; Alkire (nee Nasr), Linda/I-1030-2017	Alkire (nee Nasr), Linda/0000-0002-8184-5448			Afuah A., 2000, INTERNET BUSINESS MO; Akama Y., 2015, DESIGNING TECHNOLOGY, P163; Aksoy L, 2019, J SERV MANAGE, V30, P429, DOI 10.1108/JOSM-11-2018-0376; Amit R, 2001, STRATEGIC MANAGE J, V22, P493, DOI 10.1002/smj.187; Amit R., 2015, OXFORD HDB CREATIVIT, P3; Anderson L, 2015, J SERV RES-US, V18, P243, DOI 10.1177/1094670515591316; Anderson L, 2013, J BUS RES, V66, P1203, DOI 10.1016/j.jbusres.2…	159	8	8	6	29	EMERALD GROUP PUBLISHING LTD	BINGLEY	HOWARD HOUSE, WAGON LANE, BINGLEY BD16 1WA, W YORKSHIRE, ENGLAND	1757-5818	1757-5826		J SERV MANAGE	J. Serv. Manage.	JAN 30	2020	31	1
J	Hmieleski, KM; Sheppard, LD				Hmieleski, Keith M.; Sheppard, Leah D.			The Yin and Yang of entrepreneurship: Gender differences in the importance of communal and agentic characteristics for entrepreneurs' subjective well-being and performance	JOURNAL OF BUSINESS VENTURING			English	Article						Character strengths; Person-environment fit; Person-job fit; Positive organizational behavior; Positive psychology; Gender differences; Subjective well-being	PERSON-ENVIRONMENT FIT; UNDERSTANDING GENDER; VENTURE PERFORMANCE; METHOD BIAS; WOMEN; LEADERSHIP; CREATIVITY; RISK; MEN; CONSEQUENCES		This research examines gender differences in the relationships of entrepreneurs' agentic and communal personality characteristics with measures of subjective well-being and new venture performance. Results from a stratified national (USA) random sample of founding CEOs (N = 303) demonstrate the advantages of an agentic characteristic (creativity) for women and a communal characteristic (teamwork)…	[Hmieleski, Keith M.] Texas Christian Univ, Neeley Sch Business, Dept Entrepreneurship, TCU Box 298530, Ft Worth, TX 76129 USA; [Sheppard, Leah D.] Washington State Univ, Carson Coll Business, Dept Management Informat Syst & Entrepreneurship, 437D Todd Hall, Pullman, WA 99164 USA	Hmieleski, KM (corresponding author), Texas Christian Univ, Neeley Sch Business, Dept Entrepreneurship, TCU Box 298530, Ft Worth, TX 76129 USA.	k.hmieleski@tcu.edu; leah.sheppard@wsu.edu					ABDELHALIM AA, 1981, PERS PSYCHOL, V34, P549, DOI 10.1111/j.1744-6570.1981.tb00495.x; Ahl H, 2004, SCI REPROD GENDER IN; Ahl H, 2006, ENTREP THEORY PRACT, V30, P595, DOI 10.1111/j.1540-6520.2006.00138.x; Alvarez SA, 2005, J MANAGE, V31, P776, DOI 10.1177/0149206305279486; Baron R. A., 2014, ESSENTIALS ENTREPREN; Baron RA, 2003, J BUS VENTURING, V18, P41, DOI 10.1016/S0883-9026(00)00069-0; Baron R…	109	8	8	4	46	ELSEVIER	AMSTERDAM	RADARWEG 29, 1043 NX AMSTERDAM, NETHERLANDS	0883-9026	1873-2003		J BUS VENTURING	J. Bus. Ventur.	JUL	2019	34	4
J	Yankson, PWK; Gough, KV				Yankson, Paul W. K.; Gough, Katherine, V			Gold in Ghana: The effects of changes in large-scale mining on artisanal and small-scale mining (ASM)	EXTRACTIVE INDUSTRIES AND SOCIETY-AN INTERNATIONAL JOURNAL			English	Article						Mining; Gold; Employment; Urban; Ghana	SUB-SAHARAN AFRICA; ENTREPRENEURSHIP; PERSPECTIVES; CONFLICT		Two scales of gold mining operations, artisanal and small-scale mining (ASM) and large-scale mining, have operated side by side in Ghana for decades. In the past, the two co-existed on the same mineralised land without much contact or conflict, as large-scale mining occurred underground and ASM operated mainly on the surface. With the former's transition from an underground labour-intensive minin…	[Yankson, Paul W. K.] Univ Ghana, Dept Geog & Resource Dev, Legon, Ghana; [Gough, Katherine, V] Loughborough Univ, Dept Geog, Loughborough, Leics, England	Yankson, PWK (corresponding author), Univ Ghana, Dept Geog & Resource Dev, Legon, Ghana.	pyankson@ug.edu.gh; k.v.gough@lboro.ac.uk	Gough, Katherine/AAO-2639-2020		Department for International Development (DfID); Economic and Social Research CouncilEconomic & Social Research Council (ESRC) [ESRC RES-167-25-0488]	We are grateful to the Department for International Development (DfID) and the Economic and Social Research Council (ESRC RES-167-25-0488) for their financial support of the Urban Growth and Poverty in Mining Africa (UPIMA) research programme. The constructive input initially from James Esson and subsequently from two anonymous reviewers and the Editor Gavin Hilson helped improve the paper consid…	Addo-Fening R, 1997, AKYEM ABUAKWA 1700 1, P233; Akabzaa T, 2001, STUDY IMPACTS MINING; Akabzaa T., 2009, MINING AFRICA REGULA, P25; Andrew JS, 2003, J CLEAN PROD, V11, P117, DOI 10.1016/S0959-6526(02)00032-X; Andrews N., 2015, AFR TODAY, V62, P2; [Anonymous], 2017, STAT GHAN EC 2016; Aryee B. N. A, 2013, CONTRIBUTION MINERAL, P7139; Aubynn A, 2009, RESOUR POLICY, V34, P64, DOI 10.1016/j.resourpo…	68	8	8	1	4	ELSEVIER SCI LTD	OXFORD	THE BOULEVARD, LANGFORD LANE, KIDLINGTON, OXFORD OX5 1GB, OXON, ENGLAND	2214-790X	2214-7918		EXTRACT IND SOC	Extr. Ind. Soc.	JAN	2019	6	1
J	Steffens, NK; Yang, J; Jetten, J; Haslam, SA; Lipponen, J				Steffens, Niklas K.; Yang, Jie; Jetten, Jolanda; Haslam, S. Alexander; Lipponen, Jukka			The Unfolding Impact of Leader Identity Entrepreneurship on Burnout, Work Engagement, and Turnover Intentions	JOURNAL OF OCCUPATIONAL HEALTH PSYCHOLOGY			English	Article						leadership; identity entrepreneurship; social identity; burnout; health	SOCIAL IDENTITY; TRANSFORMATIONAL LEADERSHIP; ORGANIZATIONAL IDENTIFICATION; MEDIATING ROLE; MULTIPLE IDENTITIES; MEMBER EXCHANGE; JOB DEMANDS; MODEL; FOLLOWERS; HEALTH	10	The present research expands upon previous theory and empirical work concerning the leadership-health link by examining the lagged effects of leader identity entrepreneurship (i.e., leaders' creation of a sense of "we" and "us" among team members) on team members' burnout, work engagement and turnover intentions. We report results from a 2-wave field study with employees from a large solar panel …	[Steffens, Niklas K.; Jetten, Jolanda; Haslam, S. Alexander] Univ Queensland, Sch Psychol, Brisbane, Qld, Australia; [Yang, Jie] Jiangxi Univ Finance & Econ, Res Ctr Innovat & Strateg Human Resource Manageme, RM 713,Yingfu Tower,Yuping West Ave,Mailu Campus, Nanchang 330032, Jiangxi, Peoples R China; [Lipponen, Jukka] Univ Helsinki, Dept Social Res, Helsinki, Finland	Yang, J (corresponding author), Jiangxi Univ Finance & Econ, Res Ctr Innovat & Strateg Human Resource Manageme, RM 713,Yingfu Tower,Yuping West Ave,Mailu Campus, Nanchang 330032, Jiangxi, Peoples R China.	jerryyang66@sina.com	Yang, Jie/C-1366-2011; Haslam, Alex/AAA-2512-2019; Steffens, Niklas/D-3609-2016	Yang, Jie/0000-0001-6912-4966; Haslam, Alex/0000-0001-9523-7921; Steffens, Niklas/0000-0002-3990-2592	National Natural Science Foundation of China (NSFC)National Natural Science Foundation of China (NSFC) [70962001, 71161009]; Australian Research CouncilAustralian Research Council [FT110100238, FL110100199]; NSFC projectNational Natural Science Foundation of China (NSFC) [71161009]	This work was supported by two grants from the National Natural Science Foundation of China awarded to Jie Yang and Weiquan Deng (NSFC. 70962001, 71161009), and two grants from the Australian Research Council to Jolanda Jetten and S. Alexander Haslam (FT110100238, FL110100199). Jie Yang is the co-investigator of NSFC project (71161009).	Agarwal UA, 2012, CAREER DEV INT, V17, P208, DOI 10.1108/13620431211241063; Arnold K. A., 2013, WILEY BLACKWELL HDB, P175; Arnold KA, 2007, J OCCUP HEALTH PSYCH, V12, P193, DOI 10.1037/1076-8998.12.3.193; Arnold KA, 2015, J OCCUP HEALTH PSYCH, V20, P481, DOI 10.1037/a0039045; ASHFORTH BE, 1989, ACAD MANAGE REV, V14, P20, DOI 10.2307/258189; Ashforth BE, 2008, J MANAGE, V34, P325, DOI 10.1177/0149…	122	8	8	6	34	AMER PSYCHOLOGICAL ASSOC	WASHINGTON	750 FIRST ST NE, WASHINGTON, DC 20002-4242 USA	1076-8998	1939-1307		J OCCUP HEALTH PSYCH	J. Occup. Health Psychol.	JUL	2018	23	3
J	Packard, MD; Bylund, PL				Packard, Mark D.; Bylund, Per L.			On the relationship between inequality and entrepreneurship	STRATEGIC ENTREPRENEURSHIP JOURNAL			English	Article						competition; economics; emerging economies; entrepreneurship; inequality	INCOME INEQUALITY; POVERTY; WEALTH; GROWTH; LIFE; PERSPECTIVE; EVOLUTION; HAPPINESS; TAKEOFF; DEMAND		Research SummaryWe reexamine and explore the modern view of inequality against entrepreneurial market process theories, which leads us to three key assertions. First, we question the validity of income inequality as a proxy for true inequality (i.e., inequality of individual well-being), observing nonlinearity between the two constructs. Second, we explore the entrepreneurial microfoundations of …	[Packard, Mark D.] Univ Nevada, Coll Business, Dept Managerial Sci, 1664 N Virginia St, Reno, NV 89557 USA; [Bylund, Per L.] Oklahoma State Univ, Sch Entrepreneurship, Spears Sch Business, 217 Business Bldg, Stillwater, OK 74078 USA	Packard, MD (corresponding author), Univ Nevada, Coll Business, Dept Managerial Sci, 1664 N Virginia St, Reno, NV 89557 USA.; Bylund, PL (corresponding author), Oklahoma State Univ, Sch Entrepreneurship, Spears Sch Business, 217 Business Bldg, Stillwater, OK 74078 USA.	mpackard@unr.edu; per.bylund@okstate.edu	Packard, Mark/Q-5570-2018	Packard, Mark/0000-0003-0991-4266; Bylund, Per/0000-0002-4332-6495	Institute for Humane Studies	Institute for Humane Studies	ABERNATHY WJ, 1978, TECHNOL REV, V80, P40; Acemoglu D, 2002, J ECON LIT, V40, P7; Acemoglu D., 2012, WHY NATIONS FAIL ORI; Acemoglu D., 2014, RISE FALL GEN LAWS C; Acemoglu D, 2004, J EUR ECON ASSOC, V2, P162, DOI 10.1162/154247604323067916; Acemoglu D, 2009, SCIENCE, V326, P678, DOI 10.1126/science.1181939; Agarwal R, 2002, MANAGE SCI, V48, P1024, DOI 10.1287/mnsc.48.8.1024.167; Arin KP, 2015, J…	147	8	8	4	54	WILEY	HOBOKEN	111 RIVER ST, HOBOKEN 07030-5774, NJ USA	1932-4391	1932-443X		STRATEG ENTREP J	Strateg. Entrep. J.	MAR	2018	12	1
J	Parris, DL; McInnis-Bowers, CV				Parris, Denise L.; McInnis-Bowers, Cecilia V.			Social Entrepreneurship Questioning the Status Quo: Waste as a Resource	JOURNAL OF ECONOMIC ISSUES			English	Article						causation process; development; effectual process; environmental sustainability; social entrepreneurship; social value			There has been an increasing interest in social entrepreneurs' roles in creating social value, fostering economic development, and advancing environmental sustainability. In institutional economics, there is extensive support for entrepreneurship as having a positive impact on economic development and personal wellbeing. This paper challenges the accepted understanding of social entrepreneurs as …	[Parris, Denise L.; McInnis-Bowers, Cecilia V.] Rollins Coll, Dept Business & Social Entrepreneurship, Winter Pk, FL 32789 USA	Parris, DL (corresponding author), Rollins Coll, Dept Business & Social Entrepreneurship, Winter Pk, FL 32789 USA.						Braun Justin, 2013, ORLANDO MAGAZINE; Dacin Tina, 2011, ORGANIZATIONAL SCIEN, V22, P1203; Dale G, 2012, J ECON ISSUES, V46, P859, DOI 10.2753/JEI0021-3624460402; Gaglio CM, 2001, SMALL BUS ECON, V16, P95, DOI 10.1023/A:1011132102464; Gimmon E, 2009, J ECON ISSUES, V43, P715, DOI 10.2753/JEI0021-3624430307; Kirzner I., 1999, REV AUSTRIAN EC, V11, P5, DOI [10.1023/A:1007719905868, DOI 10.1023/A:100…	23	8	9	2	48	ROUTLEDGE JOURNALS, TAYLOR & FRANCIS LTD	ABINGDON	4 PARK SQUARE, MILTON PARK, ABINGDON OX14 4RN, OXFORDSHIRE, ENGLAND	0021-3624	1946-326X		J ECON ISSUES	J. Econ. Issues	JUN	2014	48	2
J	Meier, RL				Meier, RL			Late-blooming societies can be stimulated by information technology	FUTURES			English	Article									About 50 societies in the world have been unable to make significant progress toward development over the last several decades, despite various kinds of assistance. Information technology is a powerful new tool that has not yet been applied. It can strongly reinforce and redirect more familiar programs, and expedite others, such as education, micro-enterprise formation, community-oriented non-gov…	Univ Calif Berkeley, Berkeley, CA 94720 USA	Meier, RL (corresponding author), Univ Calif Berkeley, Berkeley, CA 94720 USA.						Cobb C., 1995, GENUINE PROGR INDICA; Dahl R.A., 1997, DEMOCRACY JOURNEY RE; Dia M., 1996, AFRICAS MANAGEMENT 1; Evans JV, 1998, SCI AM, V278, P70, DOI 10.1038/scientificamerican0498-70; HENDERON H, 1997, LOOKING BACK 21 CENT, P23; KAMALUDDIN S, 1997, FAR E EC REV, V160, P79; Katz J, 1997, WIRED, V5, P49; KELLY K, 1997, WIRED, V5, P140; KING BA, 1998, SAN FRANCISCO E 0114; KRISHNA A, 1997, REASONS…	25	8	8	0	5	ELSEVIER SCI LTD	OXFORD	THE BOULEVARD, LANGFORD LANE, KIDLINGTON, OXFORD OX5 1GB, OXON, ENGLAND	0016-3287			FUTURES	Futures	MAR	2000	32	2
J	Wang, X; Aoki, N				Wang, Xue; Aoki, Nobuo			Paradox between neoliberal urban redevelopment, heritage conservation, and community needs: Case study of a historic neighbourhood in Tianjin, China	CITIES			English	Article						Neoliberal urbanism; Property-led redevelopment; Heritage conservation; Community perspective; Community inclusion	COMMERCIAL GENTRIFICATION; GOVERNANCE; GUANGZHOU; CITY; ENTREPRENEURIALISM; COMMODIFICATION; TRANSFORMATION; URBANIZATION; REGENERATION; ASSOCIATIONS		Today, China's inner-city redevelopment has evolved into the neoliberalism phase, which is characterized by market orientation, privatization, commodification, and short-term returns; this phase generally involves massive demolition and eviction, resulting in serious conflicts between land-based economic growth, heritage conservation, and social justice. The local community is susceptible to soci…	[Wang, Xue; Aoki, Nobuo] Tianjin Univ, Sch Architecture, 92 Weijin Rd, Tianjin 300072, Peoples R China	Wang, X (corresponding author), Tianjin Univ, Sch Architecture, 92 Weijin Rd, Tianjin 300072, Peoples R China.	wangxue0327@163.com		Wang, Xue/0000-0003-0570-5467	Major Projects of the National Social Science Foundation of China [12ZD230]	This work was financially supported by Major Projects of the National Social Science Foundation of China (grant number 12&ZD230). We thank WANG Chao for taking photographs of fieldwork used in this study and his participation and assistance in the fieldwork.	Atkinson R, 2003, URBAN STUD, V40, P2343, DOI 10.1080/0042098032000136093; Australia ICOMOS, 1979, BURR CHART AUSTR ICO; Blumenfeld T, 2013, CULTURAL HERITAGE PO; Brenner N., 2002, SPACES NEOLIBERALISM; Brenner Neil, 2011, CITIES PEOPLE NOT PR; Chen J, 2014, HOUSING STUD, V29, P534, DOI 10.1080/02673037.2013.873392; Cheng Z, 2012, COMMUNITY DEV, V43, P430, DOI 10.1080/15575330.2012.711763; Clark …	90	7	9	8	56	ELSEVIER SCI LTD	OXFORD	THE BOULEVARD, LANGFORD LANE, KIDLINGTON, OXFORD OX5 1GB, OXON, ENGLAND	0264-2751	1873-6084		CITIES	Cities	FEB	2019	85
J	Olafsen, AH; Frolund, CW				Olafsen, Anja Hagen; Frolund, Claus Wiemann			Challenge accepted! Distinguishing between challenge- and hindrance demands	JOURNAL OF MANAGERIAL PSYCHOLOGY			English	Article						Well-being; Motivation; Job demands; Job characteristics	PSYCHOLOGICAL NEED SATISFACTION; SELF-DETERMINATION THEORY; JOB DEMANDS; WORK ENGAGEMENT; EMPLOYEE ENGAGEMENT; METAANALYTIC TEST; RESOURCES MODEL; BURNOUT; MOTIVATION; COMPETENCE		Purpose The purpose of this paper was to test a model that differentiated between two types of job demands in relation to basic psychological need satisfaction, work motivation, and, in turn, employee well-being. In particular, job challenges and job hindrances were hypothesized to relate to this motivational process in different ways. Design/methodology/approach Survey data from a sample of 160 …	[Olafsen, Anja Hagen; Frolund, Claus Wiemann] Univ South Eastern Norway, Sch Business, Kongsberg, Norway	Frolund, CW (corresponding author), Univ South Eastern Norway, Sch Business, Kongsberg, Norway.	frolund.claus@gmail.com	Olafsen, Anja H./AAE-8821-2020				Albrecht SL, 2015, J PERS PSYCHOL, V14, P70, DOI 10.1027/1866-5888/a000122; Bakker A. B., 2007, J MANAGERIAL PSYCHOL, V22, P309, DOI DOI 10.1108/02683940710733115; Bakker AB, 2005, HUM RELAT, V58, P661, DOI 10.1177/0018726705055967; BAUMEISTER RF, 1995, PSYCHOL BULL, V117, P497, DOI 10.1037/0033-2909.117.3.497; Bentler P.M., 2002, EQS WINDOWS USERS GU; Boehnke K, 1998, J PERS, V66, P745, DOI 10.1…	39	7	7	5	15	EMERALD GROUP PUBLISHING LTD	BINGLEY	HOWARD HOUSE, WAGON LANE, BINGLEY BD16 1WA, W YORKSHIRE, ENGLAND	0268-3946	1758-7778		J MANAGE PSYCHOL	J. Manage. Psychol.		2018	33	43955
J	Houshmand, M; Seidel, MDL; Ma, DG				Houshmand, Marjan; Seidel, Marc-David L.; Ma, Dennis G.			The Impact of Adolescent Work in Family Business on Child-Parent Relationships and Psychological Well-Being	FAMILY BUSINESS REVIEW			English	Article						family firm; adolescents; life course; parent-child relationship; self-esteem; depression	CONFLICT; TIME; ENTREPRENEURSHIP; TRANSITION; EMPLOYMENT; EXPERIENCE; QUALITY; SCHOOL; LABOR; FIRMS		Previous ecological theory of human development research shows mixed results concerning the impact of adolescent work on psychological and family outcomes. We show the consequences of working in the family firm on adolescents' parental relationships, self-esteem, and depression, highlighting the importance of high-quality work experiences in the early life course. Weighted regression analysis of …	[Houshmand, Marjan] Univ Hawaii, Shidler Coll Business, Management, Honolulu, HI 96822 USA; [Seidel, Marc-David L.] Univ British Columbia, Sauder Sch Business, OBHR, Vancouver, BC, Canada; [Ma, Dennis G.] Univ British Columbia, Sauder Sch Business, Vancouver, BC, Canada	Houshmand, M (corresponding author), Univ Hawaii, Shidler Coll Business, 2404 Maile Way,C-502b, Honolulu, HI 96822 USA.	marjanh@hawaii.edu	Seidel, Marc-David L./AAE-8815-2019	Seidel, Marc-David L./0000-0002-8391-0901	Social Sciences and Humanities Research Council of CanadaSocial Sciences and Humanities Research Council of Canada (SSHRC); Shidler College of Business; Sauder School of Business	The author(s) disclosed receipt of the following financial support for the research, authorship, and/or publication of this article: This research was supported by funding from the Social Sciences and Humanities Research Council of Canada, the Shidler College of Business, and the Sauder School of Business. It was made possible through Statistics Canada providing access to the microlevel data thro…	Adams GA, 1996, J APPL PSYCHOL, V81, P411, DOI 10.1037/0021-9010.81.4.411; Aldrich HE, 2003, J BUS VENTURING, V18, P573, DOI 10.1016/S0883-9026(03)00011-9; Arregle JL, 2007, J MANAGE STUD, V44, P73, DOI 10.1111/j.1467-6486.2007.00665.x; Ashbourne LM, 2010, J FAM ISSUES, V31, P1419, DOI 10.1177/0192513X10365303; ASTONE NM, 1991, AM SOCIOL REV, V56, P309, DOI 10.2307/2096106; Astrachan J. H., 2003,…	70	7	7	3	26	SAGE PUBLICATIONS INC	THOUSAND OAKS	2455 TELLER RD, THOUSAND OAKS, CA 91320 USA	0894-4865	1741-6248		FAM BUS REV	Fam. Bus. Rev.	SEP	2017	30	3
J	Jenkins, LD; Romanos, M				Jenkins, Laura Dudley; Romanos, Michael			The art of tourism-driven development: economic and artistic well-being of artists in three Balinese communities	JOURNAL OF TOURISM AND CULTURAL CHANGE			English	Article						art; economic development; tourism; Indonesia; Bali; sustainability			One route from coastal to inland Bali traverses three communities with different types of art, from mass-produced art for beachside tourists in Sanur, through the village of Mas, home to mask and wood carving workshops, to several high-end galleries and renowned museums in Ubud, known for painting. This comparative case study, based on our interviews with artists, museum directors, collectors, co…	[Jenkins, Laura Dudley] Univ Cincinnati, McMicken Coll Arts & Sci, Dept Polit Sci, Cincinnati, OH 45221 USA; [Romanos, Michael] Univ Cincinnati, Sch Design Art Architecture & Planning DAAP, Cincinnati, OH 45221 USA	Jenkins, LD (corresponding author), Univ Cincinnati, McMicken Coll Arts & Sci, Dept Polit Sci, Cincinnati, OH 45221 USA.	laura.jenkins@uc.edu		Jenkins, Laura/0000-0002-7259-4448			Appadurai A., 1990, THEOR CULT SOC, V7, P2, DOI DOI 10.1177/026327690007002017; Appadurai A, 1986, SOCIAL LIFE THINGS C; Atkinson R, 2001, SOCIAL RES UPDATE; Barley N., 2009, ISLAND DEMONS; Berg I, 2012, J TOUR CULT CHANGE, V10, P84, DOI 10.1080/14766825.2012.660946; Bourdieu P., 1990, REPROD ED SOC CULTUR, V4; Bourdieu Pierre, 1993, FIELD CULTURAL PRODU; Cole S., 2007, TOURISM CULTURE DEV; Covar…	43	7	7	0	33	ROUTLEDGE JOURNALS, TAYLOR & FRANCIS LTD	ABINGDON	4 PARK SQUARE, MILTON PARK, ABINGDON OX14 4RN, OXFORDSHIRE, ENGLAND	1476-6825	1747-7654		J TOUR CULT CHANGE	J. Tour. Cult. Chang.	37530	2014	12	4
J	Reese, LA				Reese, Laura A.			Immigration and the economic health of Canadian cities	ENVIRONMENT AND PLANNING C-GOVERNMENT AND POLICY			English	Article						economic development; immigration; diversity	CREATIVE CLASS; SETTLEMENT-PATTERNS; POLITICAL-ECONOMY; EMPLOYMENT GROWTH; ETHNIC DIVERSITY; UNITED-STATES; ENTREPRENEURSHIP; POLICY; COMMUNITY; OPPORTUNITIES		This research explores relationships between diversity of local populations and economic well-being: specifically, the connections between foreign-born populations, other measures of community diversity, and local economic health. Using data from the population of mid-sized Canadian cities, I conclude that there is a significant relationship between immigration and health. Several other aspects o…	Michigan State Univ, Global Urban Studies Program, E Lansing, MI 48824 USA	Reese, LA (corresponding author), Michigan State Univ, Global Urban Studies Program, E Lansing, MI 48824 USA.	reesela@msu.edu		Reese, Laura/0000-0003-4217-970X			Abu-Laban Y, 2005, URBAN AFF REV, V40, P520, DOI 10.1177/1078087404273443; Alesina A, 2005, J ECON LIT, V43, P762, DOI 10.1257/002205105774431243; Alesina A, 2002, 9411 WP NAT BUR EC R; [Anonymous], 2010, ECONOMIST 1218, P55; Baird J, 2008, SOCIOL INQ, V78, P310, DOI 10.1111/j.1475-682X.2008.00242.x; Bates T, 2006, J AM PLANN ASSOC, V72, P227, DOI 10.1080/01944360608976741; Baycan-Levent T, 2009,…	86	7	7	1	38	SAGE PUBLICATIONS LTD	LONDON	1 OLIVERS YARD, 55 CITY ROAD, LONDON EC1Y 1SP, ENGLAND	0263-774X	1472-3425		ENVIRON PLANN C	Environ. Plan. C-Gov. Policy		2012	30	2
J	Cook, CC; Bruin, MJ; Yust, BL; Crull, SR; Shelley, MC; Laux, S; Memken, J; Niemeyer, S; Mite, BJ				Cook, Christine C.; Bruin, Marilyn J.; Yust, Becky L.; Crull, Sue R.; Shelley, Mack C.; Laux, Sharan; Memken, Jean; Niemeyer, Shirley; Mite, B. J.			Evidence of a Housing Decision Chain in Rural Community Vitality	RURAL SOCIOLOGY			English	Article							ENTREPRENEURIAL SOCIAL INFRASTRUCTURE; ECONOMIC-DEVELOPMENT; NETWORKS; LEADERS; GROWTH	4	The purpose of this research was to explore and explain the role housing plays in rural community vitality. Community vitality refers to economic strength and social well-being. In spring 2002 we collected primary interview data from informants in 134 small rural communities in nine north-central states and identified related secondary data front the U.S. census. We developed a structural-equatio…	[Cook, Christine C.; Crull, Sue R.] Iowa State Univ, Dept Human Dev & Family Studies, Ames, IA 50011 USA; [Bruin, Marilyn J.; Yust, Becky L.] Univ Minnesota, Dept Design Housing & Apparel, Minneapolis, MN 55455 USA; [Shelley, Mack C.] Iowa State Univ, Dept Polit Sci, Ames, IA USA; [Shelley, Mack C.] Iowa State Univ, Dept Stat, Ames, IA USA; [Laux, Sharan] St Louis Univ, Ctr Entrepreneurship & Eco…	Cook, CC (corresponding author), Iowa State Univ, Dept Human Dev & Family Studies, Ames, IA 50011 USA.			Shelley, Mack/0000-0002-0414-5843			Agnitsch K, 2006, COMMUNITY DEV, V37, P36, DOI 10.1080/15575330609490153; ALDRICH J, 1997, AGR INFORM B USDA, V737; *AM PLANN ASS, 2006, PLANN URB DES STAND; BEERY K, 1993, MDO MULTICOMMUNI SPR, P5; Bradshaw T. K., 2000, COMMUNITY DEV J, V35, P133, DOI DOI 10.1093/CDJ/35.2.133; Broadway MJ, 2000, J RURAL STUD, V16, P37, DOI 10.1016/S0743-0167(99)00038-8; BUTLER MA, 1994, RURAL URBAN CODES ME; CAV…	63	7	7	2	11	WILEY	HOBOKEN	111 RIVER ST, HOBOKEN 07030-5774, NJ USA	0036-0112	1549-0831		RURAL SOCIOL	Rural Sociol.	MAR	2009	74	1
J	Larsson, JP; Thulin, P				Larsson, Johan P.; Thulin, Per			Independent by necessity? The life satisfaction of necessity and opportunity entrepreneurs in 70 countries	SMALL BUSINESS ECONOMICS			English	Article						Entrepreneurship; Subjective well-being; Opportunity entrepreneurship; Quality of life; Happiness research; Satisfaction	SELF-EMPLOYMENT; PERSONALITY; HAPPINESS; INCOME	3	The relationship between self-employment and subjective well-being (SWB) is contingent on the heterogeneity observed among entrepreneurs. We argue that independence and job control, two commonly suggested sources of entrepreneurs' higher SWB, are likely to disproportionately benefit opportunity entrepreneurs who were pulled into their occupation choice. A review of the psychological literature on…	[Larsson, Johan P.] Univ Cambridge, Dept Land Econ, 16-21 Silver St, Cambridge CB3 9EP, England; [Larsson, Johan P.; Thulin, Per] Swedish Entrepreneurship Forum, Stockholm, Sweden; [Larsson, Johan P.] Jonkoping Int Business Sch, Ctr Entrepreneurship & Spatial Econ CEnSE, BOX 1026, SE-55111 Jonkoping, Sweden; [Thulin, Per] KTH Royal Inst Technol, Div Econ, Dept Ind Econ & Management, Lindstedtsvag…	Thulin, P (corresponding author), KTH Royal Inst Technol, Div Econ, Dept Ind Econ & Management, Lindstedtsvagen 30, SE-11428 Stockholm, Sweden.	jpl66@cam.ac.uk; per.thulin@indek.kth.se					Amoros J.E., 2013, GLOBAL ENTREPRENEURS; Andersson M, 2016, J ECON GEOGR, V16, P39, DOI 10.1093/jeg/lbu049; Benz M, 2008, ECONOMICA, V75, P362, DOI 10.1111/j.1468-0335.2007.00594.x; Benz M, 2008, J ECON BEHAV ORGAN, V68, P445, DOI 10.1016/j.jebo.2006.10.014; Binder M, 2016, J HAPPINESS STUD, V17, P1409, DOI 10.1007/s10902-015-9650-8; Binder M, 2013, SMALL BUS ECON, V40, P1009, DOI 10.1007/s11187-…	44	6	6	3	5	SPRINGER	DORDRECHT	VAN GODEWIJCKSTRAAT 30, 3311 GZ DORDRECHT, NETHERLANDS	0921-898X	1573-0913		SMALL BUS ECON	Small Bus. Econ. Group	DEC	2019	53	4
J	Lehoux, P; Silva, HP; Sabio, RP; Roncarolo, F				Lehoux, Pascale; Silva, Hudson Pacifico; Sabio, Renata Pozelli; Roncarolo, Federico			The Unexplored Contribution of Responsible Innovation in Health to Sustainable Development Goals	SUSTAINABILITY			English	Article						health technology development; innovation policy; health policy; sustainability; Sustainable Development Goals; Responsible Research and Innovation	SOCIAL INNOVATION; BUSINESS MODEL; CANCER CARE; CHALLENGES; TECHNOLOGY; SYSTEMS; ENTREPRENEURSHIP; OPPORTUNITIES; ORGANIZATION; PERSPECTIVE		Responsible Innovation in Health (RIH) represents an emerging Science, Technology and Innovation (STI) approach that could support not only the Sustainable Development Goal (SDG) Good health and well-being but also other SDGs. Since few studies have conceptualized the relationships between RIH and the SDGs, our goal was to inductively develop a framework to identify knowledge gaps and areas for f…	[Lehoux, Pascale] Univ Montreal, Dept Hlth Management Evaluat & Policy, Montreal, PQ H3C 3J7, Canada; [Lehoux, Pascale; Silva, Hudson Pacifico; Sabio, Renata Pozelli; Roncarolo, Federico] Univ Montreal, Publ Hlth Res Inst, IRSPUM, Branch Ctr Ville, POB 6128, Montreal, PQ H3C 3J7, Canada	Lehoux, P (corresponding author), Univ Montreal, Dept Hlth Management Evaluat & Policy, Montreal, PQ H3C 3J7, Canada.; Lehoux, P (corresponding author), Univ Montreal, Publ Hlth Res Inst, IRSPUM, Branch Ctr Ville, POB 6128, Montreal, PQ H3C 3J7, Canada.	pascale.lehoux@umontreal.ca; hp.silva@umontreal.ca; renata.pozelli.sabio@umontreal.ca; federico.roncarolo@umontreal.ca	Roncarolo, Federico/W-6490-2019; Lehoux, Pascale/Q-6370-2019	Roncarolo, Federico/0000-0002-3938-9178; Lehoux, Pascale/0000-0001-9482-1800; Pozelli Sabio, Renata/0000-0002-8189-1989; Silva, Hudson/0000-0001-7507-0917	Canadian Institutes of Health Research (CIHR)Canadian Institutes of Health Research (CIHR) [FDN-143294]; Fonds de la recherche en sante du Quebec (FRQ-S)Fonds de la Recherche en Sante du Quebec	This research was funded by the Canadian Institutes of Health Research (CIHR; #FDN-143294). The first author holds a University of Montreal Chair on Responsible Innovation in Health (2015-18). Our research group infrastructure is supported by the Fonds de la recherche en sante du Quebec (FRQ-S).	Abu-Saifan S, 2012, TECHNOL INNOV MANAG, P22; Amanatidou E, 2012, SCI PUBL POLICY, V39, P208, DOI 10.1093/scipol/scs017; Antadze N, 2012, J SOC ENTREP, V3, P133, DOI 10.1080/19420676.2012.726005; Auer A, 2018, SUSTAINABILITY-BASEL, V10, DOI 10.3390/su10010017; Auerswald P., 2009, STANFORD SOCIAL INNO, P51; Bennato D., 2017, METHODS ANAL SOCIAL, P19; Bohnsack R, 2014, RES POLICY, V43, P284, DOI 10…	73	6	6	2	21	MDPI	BASEL	ST ALBAN-ANLAGE 66, CH-4052 BASEL, SWITZERLAND	2071-1050			SUSTAINABILITY-BASEL	Sustainability	NOV	2018	10	11
J	Welsh, DHB; Kaciak, E; Trimi, S; Mainardes, EW				Welsh, Dianne H. B.; Kaciak, Eugene; Trimi, Silvana; Mainardes, Emerson Wagner			Women Entrepreneurs and Family Firm Heterogeneity: Evidence from an Emerging Economy	GROUP DECISION AND NEGOTIATION			English	Article						Family firm; Women entrepreneurship; Innovation; Heterogeneity; Performance; Brazil	SOCIOEMOTIONAL WEALTH; FEMALE ENTREPRENEURS; PERFORMANCE; EMBEDDEDNESS; INVOLVEMENT; FAMILINESS; 6-COUNTRY	2, 4	Family firms add to the economic and social well-being of countries. While research on heterogeneity of family firms is gaining momentum, it has mostly been gender-neutral. The study fills this gap by examining heterogeneity of family firms owned and managed by women, in the context of a developing country-Brazil. The study draws upon the resource-based view of the firm to investigate the relatio…	[Welsh, Dianne H. B.] Univ N Carolina, Entrepreneurship, Bryan Sch Business & Econ 441, POB 26170,516 Stirling St, Greensboro, NC 27402 USA; [Kaciak, Eugene] Brock Univ, Goodman Sch Business, St Catharines, ON L2S 3A1, Canada; [Kaciak, Eugene] Kozminski Univ, Dept Quantitat Methods & Informat Technol, Warsaw, Poland; [Trimi, Silvana] Univ Nebraska, Coll Business Adm, Supply Chain & Data Analyt De…	Welsh, DHB (corresponding author), Univ N Carolina, Entrepreneurship, Bryan Sch Business & Econ 441, POB 26170,516 Stirling St, Greensboro, NC 27402 USA.	dhwelsh@uncg.edu; ekaciak@brocku.ca; silvana@unl.edu; emerson@fucape.br	Mainardes, Emerson Wagner/L-6018-2018; Trimi, Silvana/V-4464-2017; Kaciak, Eugene/AAB-7926-2020; Mainardes, Emerson/AAI-2102-2019	Mainardes, Emerson Wagner/0000-0003-2525-275X; Trimi, Silvana/0000-0002-9482-3731; Kaciak, Eugene/0000-0002-7089-0729; Mainardes, Emerson/0000-0003-2525-275X			Agier I, 2013, SMALL BUS ECON, V41, P263, DOI 10.1007/s11187-012-9429-9; Aldrich HE, 2003, J BUS VENTURING, V18, P573, DOI 10.1016/S0883-9026(03)00011-9; Allison P. D., 1999, LOGISTIC REGRESSION; [Anonymous], 2013, TRADING EC; Berrone P, 2012, FAM BUS REV, V25, P258, DOI 10.1177/0894486511435355; Brislin R. W., 1980, HDB CROSS CULTURAL P, P389; Bulgacov Y., 2014, AFRICAN J BUSINESS M, V8, P89; Ch…	74	6	6	9	32	SPRINGER	DORDRECHT	VAN GODEWIJCKSTRAAT 30, 3311 GZ DORDRECHT, NETHERLANDS	0926-2644	1572-9907		GROUP DECIS NEGOT	Group Decis. Negot.	JUN	2018	27	3
J	Nordstrom, O; Jennings, JE				Nordstrom, Onnolee; Jennings, Jennifer E.			Looking in the Other Direction: An Ethnographic Analysis of How Family Businesses Can Be Operated to Enhance Familial Well-Being	ENTREPRENEURSHIP THEORY AND PRACTICE			English	Article						family business; familial well-being; synergistic perspective; ethnography; Hutterites	ENTREPRENEURSHIP; SCIENCE; WEALTH		While much family business research has examined how family ownership affects businesses, this paper raises a question consistent with enquiries in the latter direction: How can family firms be operated to enhance the well-being of owning families and their members? We address this question by analyzing ethnographic data collected from an "extreme case'' of both family enterprising and familial w…	[Nordstrom, Onnolee] North Dakota State Univ, Management & Mkt Dept, Fargo, ND USA; [Jennings, Jennifer E.] Univ Alberta, Alberta Sch Business, Edmonton, AB, Canada	Nordstrom, O (corresponding author), North Dakota State Univ, Fargo, ND 58105 USA.	onnolee.nordstrom@ndsu.edu	Jennings, Jennifer/AAK-7074-2020		University of Alberta Winspear Senior Faculty Fellowship	The author(s) disclosed receipt of the following financial support for the research, authorship, and/or publication of this article: Partial funding was provided by a University of Alberta Winspear Senior Faculty Fellowship awarded to the second author.	Aldrich HE, 2003, J BUS VENTURING, V18, P573, DOI 10.1016/S0883-9026(03)00011-9; Ames BD, 2006, FAM RELAT, V55, P119, DOI 10.1111/j.1741-3729.2006.00361.x; Andrews Frank M., 1976, SOCIAL INDICATORS WE; Astrachan JH, 2003, J BUS VENTURING, V18, P567, DOI 10.1016/S0883-9026(03)00010-7; Barnes L. B., 1988, FAMILY BUSINESS REV, V1, P9, DOI DOI 10.1111/J.1741-6248.1988.00009.X; BEACH BA, 1987, FAM REL…	87	6	6	5	30	SAGE PUBLICATIONS INC	THOUSAND OAKS	2455 TELLER RD, THOUSAND OAKS, CA 91320 USA	1042-2587	1540-6520		ENTREP THEORY PRACT	Entrep. Theory Pract.	MAR	2018	42	2
J	Gordon, K; Wilson, J; Tonner, A; Shaw, E				Gordon, Katy; Wilson, Juliette; Tonner, Andrea; Shaw, Eleanor			How can social enterprises impact health and well-being?	INTERNATIONAL JOURNAL OF ENTREPRENEURIAL BEHAVIOR & RESEARCH			English	Article						Food poverty; Social enterprise; Structuration theory; Health and well-being; Community food initiatives	PUBLIC-HEALTH; FOOD POVERTY; ENTREPRENEURSHIP; INNOVATION; NUTRITION; PROMOTION; COUNTRIES; ENHANCE		Purpose The purpose of this paper is to examine the impacts of social enterprise on individual and community health and well-being. It focusses on community food initiatives, their impact on the social determinants of health and the influence of structure on their outcomes. Design/methodology/approach Using an interpretive qualitative approach through case studies focussed on two community food s…	[Gordon, Katy; Wilson, Juliette; Tonner, Andrea; Shaw, Eleanor] Univ Strathclyde, Strathclyde Business Sch, Glasgow, Lanark, Scotland	Wilson, J (corresponding author), Univ Strathclyde, Strathclyde Business Sch, Glasgow, Lanark, Scotland.	juliette.wilson@strath.ac.uk					A O'Mara-Eves, 2013, PUBLIC HLTH RES, V1, P1, DOI DOI 10.3310/PHR01040; Acheson D., 1998, INDEPENDENT INQUIRY; Ashton JR, 2014, LANCET, V383, P1631, DOI 10.1016/S0140-6736(14)60536-5; Bambra C, 2010, J EPIDEMIOL COMMUN H, V64, P284, DOI 10.1136/jech.2008.082743; Baumgartner JN, 2014, INT J EPIDEMIOL, V43, P354, DOI 10.1093/ije/dyt224; Berglund K., 2012, J CRITICAL ORG INQUI, V10, P9; Black D., 19…	84	6	6	5	30	EMERALD GROUP PUBLISHING LTD	BINGLEY	HOWARD HOUSE, WAGON LANE, BINGLEY BD16 1WA, W YORKSHIRE, ENGLAND	1355-2554	1758-6534		INT J ENTREP BEHAV R	Int. J. Entrep. Behav. Res.		2018	24	3
J	Sridharan, S; Barrington, DJ; Saunders, SG				Sridharan, Srinivas; Barrington, Dani J.; Saunders, Stephen G.			Markets and marketing research on poverty and its alleviation: Summarizing an evolving logic toward human capabilities, well-being goals and transformation	MARKETING THEORY			English	Article						BoP; capability approach; market-based poverty alleviation; sanitation marketing; subsistence; well-being	SUBSISTENCE MARKETPLACES; ENTREPRENEURSHIP; SANITATION; GLOBALIZATION; INEQUALITY; CONTEXTS; EVERYDAY; WATER		Marketing practitioners and business scholars now view some of the world's poorest communities as profitable growth markets. Hence a market-based approach to poverty alleviation has gathered momentum. This article traces the evolution of such a market-based approach over four decades and highlights a gradual trend away from a deficit-reduction approach (focused on constraints and justice) towards…	[Sridharan, Srinivas; Barrington, Dani J.; Saunders, Stephen G.] Monash Univ, Dept Mkt, Monash Business Sch, Room 1033W,20 Chancellors Walk, Clayton, Vic 3800, Australia; [Barrington, Dani J.] Int Water Ctr, Brisbane, Qld, Australia; [Barrington, Dani J.] Cranfield Univ, Cranfield Water Sci Inst, Bldg 52a,Coll Rd, Cranfield MK43 0AL, Beds, England	Sridharan, S (corresponding author), Monash Univ, Dept Mkt, Monash Business Sch, Room 1033W,20 Chancellors Walk, Clayton, Vic 3800, Australia.	srinivas.sridharan@monash.edu; d.j.barrington@cranfield.ac.uk; stephen.saunders@monash.edu	Barrington, Dani/B-6182-2008; Sridharan, Srinivas/C-8397-2014	Barrington, Dani/0000-0002-1486-9247; Sridharan, Srinivas/0000-0001-6450-8071; Saunders, Stephen Graham/0000-0002-3068-7910	Australian Government under the Department of Foreign Affairs and Trade (DFAT) Development Research Awards SchemeAustralian Government [201200898]	The author(s) disclosed receipt of the following financial support for the research, authorship, and/or publication of this article: The illustration of sanitation marketing in this manuscript was made possible by the authors' involvement in a larger research project funded by the Australian Government under the Department of Foreign Affairs and Trade (DFAT) Development Research Awards Scheme, pr…	Adams W. M., 1995, POWER DEV, P87; Ahlers R, 2014, WATER ALTERN, V7, P1; ALWITT LF, 1995, AM BEHAV SCI, V38, P564, DOI 10.1177/0002764295038004007; Andersson P, 2008, MARKETING THEOR, V8, P67, DOI 10.1177/1470593107086485; Andreasen A.R., 1975, DISADVANTAGED CONSUM; Annamma J., 1989, J MACROMARKETING, V9, P17, DOI DOI 10.1177/027614678900900204; Apple MW, 2001, COMP EDUC, V37, P409, DOI 10.1080/0…	75	6	6	2	18	SAGE PUBLICATIONS INC	THOUSAND OAKS	2455 TELLER RD, THOUSAND OAKS, CA 91320 USA	1470-5931	1741-301X		MARKETING THEOR	Mark. Theory	SEP	2017	17	3
J	Brummer, V; Herbes, C; Gericke, N				Brummer, Vasco; Herbes, Carsten; Gericke, Naomi			CONFLICT HANDLING IN RENEWABLE ENERGY COOPERATIVES (RECs): ORGANIZATIONAL EFFECTS AND MEMBER WELL-BEING	ANNALS OF PUBLIC AND COOPERATIVE ECONOMICS			English	Article						Cooperatives; renewable energy; conflict handling	ENTREPRENEURSHIP; RESOLUTION; PARADOX; CHOICE		We investigate conflict handling in Renewable Energy Cooperatives (RECs) in Germany. Conflict handling in this context shows to be unique due to RECs' business model and the relationship between members and their organization. Unlike in other cooperative firms, most REC members in Germany neither work for their cooperative nor do they receive goods or services from it. We document frequent contro…	[Brummer, Vasco; Herbes, Carsten] Nuertingen Geislingen Univ, Nurtingen, Germany; [Gericke, Naomi] Alanus Univ Arts & Social Sci, Alfter, Germany	Brummer, V (corresponding author), Nuertingen Geislingen Univ, Nurtingen, Germany.	vasco.brummer@hfwu.de	Herbes, Carsten/J-4566-2019	Herbes, Carsten/0000-0003-0670-8045; Brummer, Vasco/0000-0003-3541-6375	Ministry of the Environment, Climate Protection and the Energy Sector Baden-Wurttemberg in the BWPLUS program [BWE 13014]	The authors would like to thank Judith Rognli for her invaluable help gathering data and fruitful discussions, and two anonymous reviewers for their comments. This work was supported by the Ministry of the Environment, Climate Protection and the Energy Sector Baden-Wurttemberg in the BWPLUS program (grant number BWE 13014). E-mail: vasco.brummer@hfwu.de	ATWOOD L., 2008, RURAL COOPERATIVES; Austin J, 2006, ENTREP THEORY PRACT, V30, P1, DOI 10.1111/j.1540-6520.2006.00107.x; Barki H, 2001, MIS QUART, V25, P195, DOI 10.2307/3250929; BLAZEJEWSKI S., 2011, POLITICS POWER MULTI, P137; Boone C, 2014, ACAD MANAGE J, V57, P990, DOI 10.5465/amj.2012.0194; BUNDESMINISTERIUM DER JUSTIZ UND FuR VERBRAUCHERSCHUTZ, 2006, GES BETR ERW WIRTSCH; Cai DA, 2002, COMM…	59	6	6	2	14	WILEY	HOBOKEN	111 RIVER ST, HOBOKEN 07030-5774, NJ USA	1370-4788	1467-8292		ANN PUBLIC COOP ECON	Ann. Public Coop. Econ.	JUN	2017	88	2
J	Godinho, V; Venugopal, S; Singh, S; Russell, R				Godinho, Vinita; Venugopal, Srinivas; Singh, Supriya; Russell, Roslyn			When Exchange Logics Collide: Insights from Remote Indigenous Australia	JOURNAL OF MACROMARKETING			English	Article						indigenous exchange; indigenous money management; alternative economies; subsistence marketplaces; marketing systems	SUBSISTENCE ENTREPRENEURSHIP; LITERACY EDUCATION; SYSTEMS; INSTITUTIONS		The introduction of money into previously non-monetary, alternative economies can lead to many socio-cognitive tensions, if money is perceived as having been imposed from the outside', and disconnected from traditional ways of life. In this paper, we employ the lens of institutional theory to frame the phenomenon of money-use in remote Indigenous Australia. Through an immersive study in two remot…	[Godinho, Vinita] RMIT Univ, Bldg 80,Swanston St, Melbourne, Vic 3000, Australia; [Singh, Supriya] RMIT Univ, Grad Sch Business & Law, Sociol Commun, Melbourne, Vic, Australia; [Russell, Roslyn] RMIT Univ, Econ Finance & Mkt, Melbourne, Vic, Australia; [Venugopal, Srinivas] Univ Illinois, Champaign, IL 61820 USA	Godinho, V (corresponding author), RMIT Univ, Bldg 80,Swanston St, Melbourne, Vic 3000, Australia.	vinita.godinho@iinet.net.au		Russell, Roslyn/0000-0003-0578-8119			Adkins NR, 2005, J CONSUM RES, V32, P93, DOI 10.1086/429603; Anne Daly, 1999, AGENDA J POLICY ANAL, V6, P5; Anselm Strauss, 1997, GROUNDED THEORY PRAC; Arvidsson A, 2008, J MACROMARKETING, V28, P326, DOI 10.1177/0276146708326077; Australian Bureau of Statistics, 2012, RES REPORT; Bagele Chilisa, 2012, INDIGENOUS RES METHO; Baker SM, 2015, J MACROMARKETING, V35, P334, DOI 10.1177/0276146714550994;…	71	6	6	1	6	SAGE PUBLICATIONS INC	THOUSAND OAKS	2455 TELLER RD, THOUSAND OAKS, CA 91320 USA	0276-1467	1552-6534		J MACROMARKETING	J. Macromarketing	JUN	2017	37	2
J	Hermes, JWS; Mainela, T				Hermes, Jan W. S.; Mainela, Tuija			Mobilizing crisis management networks - Entrepreneurial behavior in turbulent contexts	INDUSTRIAL MARKETING MANAGEMENT			English	Article						Network mobilization; Institutional entrepreneurship; Crisis management; Turbulent context; Unpredictability	INSTITUTIONAL ENTREPRENEURSHIP; BUSINESS NETWORKS; COLLECTIVE ACTION; INTERNATIONAL-BUSINESS; PERSPECTIVES; CONFLICT; AGENCY; POLICY		Severe socio-economic issues that threaten peace, life or wellbeing of humans in specific regions of the world cannot be solved by any single actor. Wide networks of political, business, governmental, non-profit and humanitarian organizations are to be involved to change existing practices. Despite conflicting interests and competing behavior, involved organizations need to act collectively to in…	[Hermes, Jan W. S.; Mainela, Tuija] Univ Oulu, Oulu Business Sch, Dept Management & Int Business, Oulu 90014, Finland	Hermes, JWS (corresponding author), Univ Oulu, Oulu Business Sch, Dept Management & Int Business, POB 4600, Oulu 90014, Finland.	jan.hermes@oulu.fi; tuija.mainela@oulu.fi		Mainela, Tuija/0000-0001-6353-1894			Araujo L., 1994, M CHALL NEW FRONT P, P59; Axelsson Bjorn, 2002, CRIT PERSPECT, P437; Battilana J, 2009, ACAD MANAG ANN, V3, P65, DOI 10.1080/19416520903053598; Berger P. L., 1967, SOCIAL CONSTRUCTION; Bhaskar R., 1979, POSSIBILITY NATURALI; Brito C., 1998, INT STUDIES MANAGEME, V27, P22, DOI DOI 10.1080/00208825.1997.11656717; Brito CM, 2001, J BUS IND MARK, V16, P150, DOI 10.1108/08858620110389…	57	6	6	1	33	ELSEVIER SCIENCE INC	NEW YORK	360 PARK AVE SOUTH, NEW YORK, NY 10010-1710 USA	0019-8501	1873-2062		IND MARKET MANAG	Ind. Mark. Manage.	SEP	2014	43	6
J	Austin, BJ; Corey, B				Austin, B. J.; Corey, B.			Factors contributing to the longevity of the commercial use of crocodiles by Indigenous people in remote Northern Australia: a case study	RANGELAND JOURNAL			English	Article						Indigenous entrepreneurship; natural resources; sustainable livelihoods; sustainable use; wildlife	CROCODYLUS-POROSUS; KEY PRINCIPLES; LIVELIHOODS; MANAGEMENT; ENTERPRISES; TERRITORY; SWAMP; LAND; AREA		Access to land and resources has not, in itself, been sufficient for improving the wellbeing of Indigenous people living in remote regions of Australia. Much of the land has limited potential for mainstream market-based economic development. However, some Indigenous Australians have been able to use wildlife commercially to realise economic opportunities and to enhance their capacity to engage in…	[Austin, B. J.] Charles Darwin Univ, Res Inst Environm & Livelihoods, Darwin, NT 0810, Australia; [Corey, B.] Bawinanga Aboriginal Corp, Maningrida, NT 0822, Australia	Austin, BJ (corresponding author), Charles Darwin Univ, Res Inst Environm & Livelihoods, Darwin, NT 0810, Australia.	beau.austin@cdu.edu.au	Corey, Ben/AAC-2676-2019	Corey, Ben/0000-0003-0189-490X	Australian Research CouncilAustralian Research Council	The authors thank the Djelk rangers, Djelk Wildlife Enterprises and the Bawinanga Aboriginal Corporation for their collaboration in this research. They also thank Stephen Garnett, Julian Gorman, Heather Aslin, Peter Whitehead and two anonymous reviewers for comments that improved the paper. The research was funded by the Australian Research Council.	ABS, 2008, 2006 CENS COMM PROF; Altman J, 2005, WILDLIFE RES, V32, P473, DOI 10.1071/WR04074; Altman J, 2007, 286 CAEPR AUSTR NAT, V286; Altman J. C., 2001, 226 CAEPR AUSTR NAT; Angrosino M.V., 2007, DOING OBSERVATIONAL; ANSELL S, 2011, ECOL MANAG RESTOR, V12, P13, DOI DOI 10.1111/j.1442-8903.2011.00575.x; Armitage D, 2007, ADAPTIVE COMANAGEMEN, P62; Austin BJ, 2011, J ENTERP COMMUNITIES, V5, P30…	63	6	6	0	18	CSIRO PUBLISHING	CLAYTON	UNIPARK, BLDG 1, LEVEL 1, 195 WELLINGTON RD, LOCKED BAG 10, CLAYTON, VIC 3168, AUSTRALIA	1036-9872	1834-7541		RANGELAND J	Rangeland J.		2012	34	3
J	Sankelo, M; Akerblad, L				Sankelo, Merja; Akerblad, Leena			Nurse entrepreneurs' well-being at work and associated factors	JOURNAL OF CLINICAL NURSING			English	Article						associated factors; entrepreneur; Finland; nurses; nursing; well-being at work	FAMILY INTERFACE; BRITISH NHS; JOB DEMANDS; STRESS; RESOURCES		A ims and objectives. This study describes the well-being at work of nurse entrepreneurs and owner-managers of social care companies in Finland from the vantage point of health and working capacity, general coping and job satisfaction and identifies factors associated with well-being. Background. In recent years, increasing numbers of nurses have been starting up in business in the social care se…	[Sankelo, Merja; Akerblad, Leena] Seinajoki Univ Appl Sci, FIN-60220 Seinajoki, Finland	Sankelo, M (corresponding author), Seinajoki Univ Appl Sci, Koskenalantie 16, FIN-60220 Seinajoki, Finland.	merja.sankelo@seamk.fi			EU Social Fund; Finnish Employment and Economic Development Centre and Ministry of Education	The authors gratefully acknowledge the grants they received for this research from the EU Social Fund, the Finnish Employment and Economic Development Centre and Ministry of Education.	Andrews GJ, 2003, J ADV NURS, V41, P403, DOI 10.1046/j.1365-2648.2003.02539.x; Andrews GJ, 2000, J ADV NURS, V31, P900, DOI 10.1046/j.1365-2648.2000.01359.x; Berglund Anna-Lena, 2007, Int J Nurs Pract, V13, P46, DOI 10.1111/j.1440-172X.2006.00602.x; Buttner E, 1992, J MANAGERIAL ISSUES, V4, P223; Caffrey Rosalie A, 2005, J Gerontol Nurs, V31, P12; Demerouti E, 2001, J APPL PSYCHOL, V86, P499, DOI…	41	6	6	1	19	WILEY	HOBOKEN	111 RIVER ST, HOBOKEN 07030-5774, NJ USA	0962-1067	1365-2702		J CLIN NURS	J. Clin. Nurs.	NOV	2009	18	22
J	Kobeissi, N				Kobeissi, Nada			Impact of the Community Reinvestment Act on New Business Start-Ups and Economic Growth in Local Markets*	JOURNAL OF SMALL BUSINESS MANAGEMENT			English	Article							CORPORATE PHILANTHROPY; FINANCIAL PERFORMANCE; COMPETITIVE ADVANTAGE; REGIONAL VARIATION; EMPLOYMENT GROWTH; BANKING INDUSTRY; CREDIT; ENTREPRENEURSHIP; LINK; MATTER		The CRA was the government's response to bank lending discrimination. However, when passing the Act, Congress was equally concerned with reversing or at least halting disinvestment from inner-city communities and in turn revitalizing local economies. Many believe that the availability of credit to establish, refinance, and improve small businesses is critical to the well-being of local communitie…	[Kobeissi, Nada] Long Isl Univ, Dept Management, New York, NY USA	Kobeissi, N (corresponding author), 30 Waterside Plaza 21-E, New York, NY 10010 USA.	nada@liu.edu					Acs ZJ, 2007, SMALL BUS ECON, V28, P109, DOI 10.1007/s11187-006-9012-3; Altman Barbara W., 1998, BUSINESS SOC, V37, P221, DOI DOI 10.1177/000765039803700205; ALTMAN BW, 1998, BUSINESS SOC REV, V102, P43, DOI DOI 10.1111/0045-3609.00024; Carod JMA, 2008, SMALL BUS ECON, V30, P73, DOI 10.1007/s11187-007-9051-4; Ardalan Kavous, 2006, J EC EC ED RES, V7, P53; ARELLANO M, 1991, REV ECON STUD, V58, P27…	91	6	6	2	22	WILEY-BLACKWELL PUBLISHING, INC	MALDEN	COMMERCE PLACE, 350 MAIN ST, MALDEN 02148, MA USA	0047-2778			J SMALL BUS MANAGE	J. Small Bus. Manag.	OCT	2009	47	4
J	Grossmann, H; Michaelis, J				Grossmann, Harald; Michaelis, Jochen			Trade sanctions and the incidence of child labor	REVIEW OF DEVELOPMENT ECONOMICS			English	Article							ECONOMICS	6	The purpose of this paper is to develop an imperfect competition model of a small open developing country to analyze the effects of trade sanctions on the incidence of child labor. We show that a uniform tariff levied by the developed countries on imports produced with the help of child labor is a failure in terms of reducing child labor. A more effective course of action would be a firm-specific…	HWWA Inst, D-20347 Hamburg, Germany; Univ Kassel, Dept Econ, D-34127 Kassel, Germany	Grossmann, H (corresponding author), HWWA Inst, Neuer Jungfernstieg 21, D-20347 Hamburg, Germany.	grossmann@hwwa.de; michaelis@wirtschaft.uni-kassel.de					Baland JM, 2000, J POLIT ECON, V108, P663, DOI 10.1086/316097; BANDYOPADHYAY S, 2005, 1514 IZA; Banerjee AV, 2004, J DEV ECON, V74, P3, DOI 10.1016/j.jdeveco.2003.12.002; Basu K, 2005, ECON LETT, V87, P169, DOI 10.1016/j.econlet.2004.10.012; Basu K, 2002, ECON LETT, V74, P301, DOI 10.1016/S0165-1765(01)00567-5; Basu K, 1999, J ECON LIT, V37, P1083, DOI 10.1257/jel.37.3.1083; Basu K, 1998, AM ECON…	23	6	6	0	2	WILEY	HOBOKEN	111 RIVER ST, HOBOKEN 07030-5774, NJ USA	1363-6669	1467-9361		REV DEV ECON	Rev. Dev. Econ.	FEB	2007	11	1
J	Reuschke, D				Reuschke, Darja			The subjective well-being of homeworkers across life domains	ENVIRONMENT AND PLANNING A-ECONOMY AND SPACE			English	Article						Self-employment; nonstandard work; flexible working; home-based work; gender	WORK-FAMILY CONFLICT; SELF-EMPLOYMENT; SATISFACTION; HOME; BALANCE; TIME; ENTREPRENEURSHIP; GENDER; FUTURE; COMPARABILITY		This paper extends the view of homeworking as a type of flexible working by employees in organisations aimed at improving work-life balance and job satisfaction, to a type of work that encapsulates significant changes of work towards increased self-employment and casual work, high proportions of which are performed in people's homes. Such changes to work represent a reconfiguration of the spatial…	[Reuschke, Darja] Univ Southampton, Dept Geog & Environm, Univ Rd,Highfield Campus, Southampton SO17 1BJ, Hants, England	Reuschke, D (corresponding author), Univ Southampton, Dept Geog & Environm, Univ Rd,Highfield Campus, Southampton SO17 1BJ, Hants, England.	d.reuschke@soton.ac.uk		Reuschke, Darja/0000-0001-6961-1801	European Research Council (ERC) through the WORKANDHOME Starting GrantEuropean Research Council (ERC) [ERC-StG-2014 639403]	The author(s) disclosed receipt of the following financial support for the research, authorship, and/or publication of this article: This study was funded by the European Research Council (ERC) through the WORKANDHOME Starting Grant (ERC-StG-2014 639403).	Allen TD, 2017, J OCCUP HEALTH PSYCH, V22, P259, DOI 10.1037/ocp0000065; Allison P. D., 2009, FIXED EFFECTS REGRES; Andersson P., 2008, J SOCIO-ECON, V37, P213, DOI DOI 10.1016/J.S0CEC.2007.03.003; Bailey DE, 2002, J ORGAN BEHAV, V23, P383, DOI 10.1002/job.144; Baruch Y, 2001, INT J MANAG REV, V3, P113, DOI 10.1111/1468-2370.00058; Bergvall-Kareborn B., 2013, WORK EMPLOY SOC, V27, P964, DOI DOI 1…	85	5	5	6	16	SAGE PUBLICATIONS INC	THOUSAND OAKS	2455 TELLER RD, THOUSAND OAKS, CA 91320 USA	0308-518X	1472-3409		ENVIRON PLANN A	Environ. Plan. A	SEP	2019	51	6
J	Ramadi, K; Srinavasan, S; Atun, R				Ramadi, Khalil; Srinavasan, Shriya; Atun, Rifat			Health diplomacy through health entrepreneurship: using hackathons to address Palestinian-Israeli health concerns	BMJ GLOBAL HEALTH			English	Article						health policy; health systems	INNOVATION; SYSTEMS		The universally shared values of improving health and well-being of populations make health a suitable diplomacy tool that transcends populations. The role of entrepreneurship in improving health and contributing to sustainable development is increasingly used in conjunction with traditional health diplomacy. In this paper, we present healthcare entrepreneurship as an effective health diplomacy t…	[Ramadi, Khalil; Srinavasan, Shriya] MIT, Hlth Sci & Technol, 77 Massachusetts Ave, Cambridge, MA 02139 USA; [Atun, Rifat] Harvard Univ, Harvard TH Chan Sch Publ Hlth, Dept Global Hlth & Populat, Boston, MA 02115 USA	Atun, R (corresponding author), Harvard Univ, Harvard TH Chan Sch Publ Hlth, Dept Global Hlth & Populat, Boston, MA 02115 USA.	ratun@hsph.harvard.edu		/0000-0002-5864-2386; Atun, Rifat/0000-0002-1531-5983			[Anonymous], 2015, ARAB POP ISR FACTS F; [Anonymous], 2018, UK HELP SERVICES OCC; [Anonymous], 2013, ISR AR CIT KEY FACTS; [Anonymous], 2015, ISR MONTHL STAT ABST; [Anonymous], 2016, ISR SETTL OCC PAL TE; [Anonymous], 2018, PROF AL ESC VIOL OCC; [Anonymous], 2018, AMAZON ACQUIRE PILLP; Baumol WJ, 2007, STRATEG ENTREP J, V1, P233, DOI 10.1002/sej.26; Bornstein D., 2007, CHANGE WORLD SOCIAL; Charar…	43	5	5	0	2	BMJ PUBLISHING GROUP	LONDON	BRITISH MED ASSOC HOUSE, TAVISTOCK SQUARE, LONDON WC1H 9JR, ENGLAND	2059-7908			BMJ GLOB HEALTH	BMJ Glob. Health	JUL	2019	4	4
J	Di Fabio, A; Duradoni, M				Di Fabio, Annamaria; Duradoni, Mirko			Intrapreneurial Self-Capital: A Primary Preventive Resource for Twenty-First Century Entrepreneurial Contexts	FRONTIERS IN PSYCHOLOGY			English	Article						intrapreneurial self-capital; entrepreneurial context; primary prevention; employability; career decision making; innovative behavior; well-being	PERCEIVED EMPLOYABILITY; POSITIVE PSYCHOLOGY; INNOVATION; VALIDATION; EFFICACY; ORGANIZATIONS; QUESTIONNAIRE; INTELLIGENCE; PERSONALITY; INSTRUMENT		This article discusses the role of intrapreneurial self-capital (ISC) as a possible primary preventive resource to effectively deal with the complexity of the current entrepreneurial environment. The article deepens both the similarities and differences between ISC and psychological capital and thus proceeds to present the most recent empirical evidence that connects ISC to (1) employability and …	[Di Fabio, Annamaria] Univ Florence, Dept Educ Languages Intercultures Literatures & P, Psychol Sect, Florence, Italy; [Duradoni, Mirko] Univ Florence, Dept Informat Engn, Florence, Italy	Di Fabio, A (corresponding author), Univ Florence, Dept Educ Languages Intercultures Literatures & P, Psychol Sect, Florence, Italy.	adifabior@psico.unifi.it	Duradoni, Mirko/AAF-2854-2019	Duradoni, Mirko/0000-0001-8272-9484			Anderson N, 2014, J MANAGE, V40, P1297, DOI 10.1177/0149206314527128; Avey JB, 2011, HUM RESOUR DEV Q, V22, P127, DOI 10.1002/hrdq.20070; Baluku M. M., 2016, J SMALL BUSINESS ENT, V28, P27, DOI DOI 10.1080/08276331.2015.1132512; Bartone P., 1995, SHORT HARDINESS SCAL, P10; Bauman Z, 2000, LIQUID MODERNITY; Betz N. E., 2000, UNPUB; Betz NE, 1996, J CAREER ASSESSMENT, V4, P47, DOI 10.1177/106907279…	88	5	5	1	8	FRONTIERS MEDIA SA	LAUSANNE	AVENUE DU TRIBUNAL FEDERAL 34, LAUSANNE, CH-1015, SWITZERLAND	1664-1078			FRONT PSYCHOL	Front. Psychol.	39569	2019	10
J	Boeri, N				Boeri, Natascia			Challenging the Gendered Entrepreneurial Subject: Gender, Development, and the Informal Economy in India	GENDER & SOCIETY			English	Article						development; neoliberalism; gender; social reproduction; informal economy; India	EMPOWERMENT; MICROCREDIT; SECTOR; WOMEN		The World Bank's premise that gender equality is good business characterizes the current gender and economic development model. Policymakers and development practitioners promote and encourage women's entrepreneurialism from the conviction that increasing women's market-based opportunities is key to lifting women, their families, and communities out of poverty, resulting in the construction of a …	[Boeri, Natascia] Bloomfield Coll, Sociol, Bloomfield, NJ USA	Boeri, N (corresponding author), Bloomfield Coll, Div Social & Behav Sci, 467 Franklin St, Bloomfield, NJ 07003 USA.	natascia_boeri@bloomfield.edu			National Science FoundationNational Science Foundation (NSF) [SES-1332621]; Graduate Center, City University of New York; American Association of University Women	This research was conducted with funding from the National Science Foundation (grant number SES-1332621), the Graduate Center, City University of New York, and the American Association of University Women. My thanks to Hester Eisenstein, Ruth Milkman, Rupal Oza, Sujatha Fernandes, and the editors and anonymous reviewers of Gender & Society for their helpful feedback. I am grateful to Namrata Bali…	Acosta-Belen E, 1990, GENDER SOC, V4, P299, DOI 10.1177/089124390004003003; Allen Sheila, 1987, HOMEWORKING MYTHS RE; Bakker I., 2008, STATES MARKETS CHALL; Balakrishnan R., 2002, HIDDEN ASSEMBLY LINE; Bannerji Himani, 1995, THINKING ESSAYS FEMI; Bedford K, 2010, SIGNS, V36, P1, DOI 10.1086/652910; Beneria L., 1992, UNEQUAL BURDEN EC CR; Beneria L., 1987, CROSSROADS CLASS GEN; Bergeron S., 2003, …	72	5	5	1	24	SAGE PUBLICATIONS INC	THOUSAND OAKS	2455 TELLER RD, THOUSAND OAKS, CA 91320 USA	0891-2432	1552-3977		GENDER SOC	Gend. Soc.	APR	2018	32	2
J	Araos, F; Ther, F				Araos, Francisco; Ther, Francisco			How to adopt an inclusive development perspective for marine conservation: preliminary insights from Chile	CURRENT OPINION IN ENVIRONMENTAL SUSTAINABILITY			English	Article							PROTECTED AREAS; BIODIVERSITY CONSERVATION; CHALLENGES; MANAGEMENT; NETWORKS; GOVERNANCE		This paper reviews the literature on marine conservation through the lens of inclusive development. Inclusive development requires ecological preservation, the promotion of human wellbeing, and empowerment of the weakest. However, the general literature on marine conservation and findings from Chile show that achieving inclusive development is challenging. This work aims to provide some key preli…	[Araos, Francisco; Ther, Francisco] Univ Lagos, Programa Atlas, Avda Fuchslocher 1305, Osorno, Chile	Araos, F (corresponding author), Univ Lagos, Programa Atlas, Avda Fuchslocher 1305, Osorno, Chile.	francisco.araos@ulagos.cl	Araos, Francisco/AAF-7196-2020		National Commission for Scientific and Technological Research of Chile (CONICYT)/National Fund for Scientific and Technological Development (FONDECYT) [3150341]	This work was supported by the National Commission for Scientific and Technological Research of Chile (CONICYT)/National Fund for Scientific and Technological Development (FONDECYT)/Project No 3150341. This contribution was in response to a call by the European Association of Development Institute's Working Group on Inclusive Development. We thank the reviewers for their helpful comments.	Alexander SM, 2015, CONSERV LETT, V8, P1, DOI 10.1111/conl.12090; Angulo-Valdes JA, 2010, MAR POLICY, V34, P635, DOI 10.1016/j.marpol.2009.12.002; Araos F, 2017, DIMENSOES HUMANS MUD; Araos Francisco, 2013, AMBIENT SOC, V16, P119, DOI [10.1590/S1414-753X2013000300008, DOI 10.1590/S1414-753X2013000300008]; Bodin O, 2006, ECOL SOC, V11; Carcamo PF, 2013, ENVIRON MANAGE, V52, P1355, DOI 10.1007/s002…	49	5	5	0	3	ELSEVIER SCI LTD	OXFORD	THE BOULEVARD, LANGFORD LANE, KIDLINGTON, OXFORD OX5 1GB, OXON, ENGLAND	1877-3435	1877-3443		CURR OPIN ENV SUST	Curr. Opin. Environ. Sustain.	FEB	2017	24
J	Mahadea, D; Ramroop, S				Mahadea, Darma; Ramroop, Shaun			INFLUENCES ON HAPPINESS AND SUBJECTIVE WELL-BEING OF ENTREPRENEURS AND LABOUR: KWAZULU-NATAL CASE STUDY	SOUTH AFRICAN JOURNAL OF ECONOMIC AND MANAGEMENT SCIENCES			English	Article						happiness; subjective well-being; education; entrepreneur; labour; gender; income; work environment	ECONOMIC-GROWTH; RISING HAPPINESS; INCOME		Globally, individuals seek happiness, but not everybody is happy. Economic reasoning suggests that rising incomes with expansions in GDP enhance the quality of life and subjective well-being. This paper examines the influences on individual happiness, using ordinal logistic regression and chi-square analyses. Based on the findings of a small case study, the chi-square test indicated that a signif…	[Mahadea, Darma] Univ KwaZulu Natal, Sch Econ & Finance, Durban, South Africa; [Ramroop, Shaun] Univ KwaZulu Natal, Sch Math Stat & Comp Sci, Durban, South Africa	Mahadea, D (corresponding author), Univ KwaZulu Natal, Sch Econ & Finance, Durban, South Africa.		Ramroop, Shaun/N-4956-2013	Ramroop, Shaun/0000-0001-9305-6967			Agresti A, 2006, CATEGORICAL DATA ANA; Allison P., 2005, LOGISTIC REGRESSION; Ashcroft J., 2007, THRIVING LIVES WHICH; Benz M, 2008, ECONOMICA, V75, P362, DOI 10.1111/j.1468-0335.2007.00594.x; BLAAUW D., 2013, J EC FINANCIAL SERVI, V6, P179, DOI DOI 10.4102/jef.v6i1.283; BLAAUW P., 2013, INT BUSINESS EC RES, V12, P635, DOI DOI 10.19030/IBER.V12I6.7870; BLANCHFLOWER D., 1992, ENTREPRENEURSHIP HAP;…	62	5	6	0	24	AOSIS	CAPE TOWN	POSTNET SUITE 55, PRIVATE BAG X22, TYGERVALLEY, CAPE TOWN, 00000, SOUTH AFRICA	2222-3436			S AFR J ECON MANAG S	S. Afr. J. Econ. Manag. Sci.		2015	18	2
J	Vesala, H; Tuomivaara, S				Vesala, Hanne; Tuomivaara, Seppo			Slowing work down by teleworking periodically in rural settings?	PERSONNEL REVIEW			English	Article						Work environment; Well-being; Knowledge work; Quantitative; Telework	KNOWLEDGE WORK; TECHNOLOGY USE; JOB QUALITY; STRESS; INTENSIFICATION; INTERRUPTIONS; BOUNDARIES; COWORKING; MOBILITY; IMPACT		Purpose - The rise of knowledge work has entailed controversial characteristics for well-being at work. Increased intensification, discontinuities and interruptions at work have been reported. However, knowledge workers have the opportunity to flexibly adjust their work arrangements to support their concentration, inspiration or recuperation. The purpose of this paper is to examine whether the ex…	[Vesala, Hanne] Univ Tampere, Sch Social Sci & Humanities, FIN-33101 Tampere, Finland; [Tuomivaara, Seppo] Finnish Inst Occupat Hlth, Dev Work & Org, Helsinki, Finland	Vesala, H (corresponding author), Univ Tampere, Sch Social Sci & Humanities, FIN-33101 Tampere, Finland.	Vesala.Hanne.L@student.uta.fi	Vesala, Hanne/J-8107-2014	Vesala, Hanne/0000-0003-0078-3140	Svenska Kulturfonden; Alands sjalvstyrelses 75-ars jubileumsfond	The work for this paper has received funding from Svenska Kulturfonden and Alands sjalvstyrelses 75-ars jubileumsfond.	Baruch Y, 2000, NEW TECH WORK EMPLOY, V15, P34, DOI 10.1111/1468-005X.00063; Bell D, 2010, J RURAL STUD, V26, P209, DOI 10.1016/j.jrurstud.2010.01.001; BENNER C, 2002, WORK NEW EC FLEXIBLE; Bilandzic M, 2013, LIBR HI TECH, V31, P254, DOI 10.1108/07378831311329040; Blackler F, 1995, ORGAN STUD, V16, P1021, DOI 10.1177/017084069501600605; Blom R., 2001, TIETOTYO JA TYOELAMA; Blom R., 2007, TIETOYHT…	72	5	5	1	31	EMERALD GROUP PUBLISHING LTD	BINGLEY	HOWARD HOUSE, WAGON LANE, BINGLEY BD16 1WA, W YORKSHIRE, ENGLAND	0048-3486	1758-6933		PERS REV	Pers. Rev.		2015	44	4
J	Engler, A; Toledo, R				Engler, Alejandra; Toledo, Roger			An analysis of factors affecting the adoption of economic and productive data recording methods of Chilean farmers	CIENCIA E INVESTIGACION AGRARIA			English	Article						Record-keeping; management skills; probability models	AGRICULTURE; COMPUTER		A. Engler, and R. Toledo. 2010. An analysis of factors affecting the adoption of economic and productive data recording methods of Chilean farmers. Cien. Inv. Agr. 37(2): 101- 109. Integration of the Chilean domestic economy into international markets has created the need to incorporate more technology, information, and management tools and to generate better entrepreneurial skills at the farm le…	[Engler, Alejandra] Univ Talca, Fac Ciencias Agr, Dept Agr Econ, Talca, Chile; [Toledo, Roger] Inst Invest Agropecuarias INIA Quilamapu, Dept Agr Econ, Chillan, Chile	Engler, A (corresponding author), Univ Talca, Fac Ciencias Agr, Dept Agr Econ, Casilla 747, Talca, Chile.	mengler@utalca.cl					Amponsah W. A., 1995, Journal of Agricultural and Applied Economics, V27, P565; BARRERA A, 2005, EC CRECIMIENTO NUEVA; Batte MT, 2005, COMPUT ELECTRON AGR, V47, P1, DOI 10.1016/j.compag.2004.08.002; BYMA J, 2007, ANN M AM AGR EC ASS; CHAI SK, 2001, CHOOSING IDENTITY GE; El-Osta HS, 2007, AGR ECON-BLACKWELL, V36, P291, DOI 10.1111/j.1574-0862.2007.00207.x; Estrella A, 1998, J BUS ECON STAT, V16, P…	14	5	6	0	10	PONTIFICIA UNIV CATOLICA CHILE, FAC AGRONOMIA INGENIERIA FORESTAL	SANTIAGO	AV VICUNA MACKENNA 4860, SANTIAGO, 00000, CHILE	0718-1620			CIENC INVESTIG AGRAR	Cienc. Investig. Agrar.	MAY-AUG	2010	37	2
J	Cochrane, A				Cochrane, Allan			Devolving the heartland: Making up a new social policy for the 'South East'	CRITICAL SOCIAL POLICY			English	Article						regional policy; state entrepreneurialism; sustainable communities	ENGLAND; GOVERNANCE; REGION		Devolution appears to challenge the traditional regional and national hierarchies of the UK, but in practice the dominance of the South East of England has been maintained through active state intervention. As social welfare has increasingly been redefined through economic success and access to the labour market, the focus of social policy has shifted accordingly. In this context the South East h…	Open Univ, Milton Keynes, Bucks, England	Cochrane, A (corresponding author), Open Univ, Milton Keynes, Bucks, England.	a.d.cochrane@open.ac.uk		Cochrane, Allan/0000-0003-0320-4642			Allen J., 1998, RETHINKING REGION; Amin A., 2003, DECENTERING NATION R; Barker K, 2004, REV HOUSING POLICY D; BREUGEL I, 1992, REST SE REGION MAKIN; COCHRANE A, 2006, IN PRESS RISE ENGLIS; *COMM SPEC AR, 1935, 1 COMM SPEC AR; *DEP ENV TRANSP RE, 1997, BUILD PARTN PROSP; *DTZPIED CONS, 2004, NEW TOWN INT CIT; *ENGL PARTN, 2004, CORP PLAN 2004 2008; FOLEY J, 2004, PROBLEMS SUCCESS REC; GORDON I, 20…	35	5	5	0	2	SAGE PUBLICATIONS LTD	LONDON	1 OLIVERS YARD, 55 CITY ROAD, LONDON EC1Y 1SP, ENGLAND	0261-0183			CRIT SOC POLICY	Crit. Soc. Policy	AUG	2006	26	3
J	Batat, W				Batat, Wided			How Michelin-starred chefs are being transformed into social bricoleurs? An online qualitative study of luxury foodservice during the pandemic crisis	JOURNAL OF SERVICE MANAGEMENT			English	Article; Early Access						Pandemic; Michelin-starred restaurant; Chefs; Luxury; Foodservice; Crisis; COVID-19; Response strategies	SERVICE RESEARCH; RESTAURANTS; INNOVATION		Purpose The purpose of this research is to examine response strategies and the change in Michelin-starred chefs' practices to adapt to the global pandemic coronavirus disease 2019 (COVID-19) crisis that has strongly affected the foodservice sector. Design/methodology/approach The authors conducted an exploratory qualitative research that used mixed-method, combining online interviews with 12 Fren…	[Batat, Wided] Univ Lyon, Normandie Business Sch, Metis Lab, Paris, France	Batat, W (corresponding author), Univ Lyon, Normandie Business Sch, Metis Lab, Paris, France.	wided.batat@yahoo.fr					Alkire L, 2020, J SERV MANAGE, V31, P24, DOI 10.1108/JOSM-05-2019-0139; Anderson L, 2015, J SERV RES-US, V18, P243, DOI 10.1177/1094670515591316; Anderson L, 2013, J BUS RES, V66, P1203, DOI 10.1016/j.jbusres.2012.08.013; Andersson P, 2010, IND MARKET MANAG, V39, P917, DOI 10.1016/j.indmarman.2010.06.011; Andrieu J., 2019, FOOD EXPT MARKETING, P57; Barnes DC, 2020, J SERV MANAGE, DOI 10.1108/JOSM…	37	4	4	18	18	EMERALD GROUP PUBLISHING LTD	BINGLEY	HOWARD HOUSE, WAGON LANE, BINGLEY BD16 1WA, W YORKSHIRE, ENGLAND	1757-5818	1757-5826		J SERV MANAGE	J. Serv. Manage.
J	Shahriar, AM; Shepherd, DA				Shahriar, Abu Zafar M.; Shepherd, Dean A.			Violence against women and new venture initiation with microcredit: Self-efficacy, fear of failure, and disaster experiences	JOURNAL OF BUSINESS VENTURING			English	Article						Domestic violence; women's entrepreneurship; Entrepreneurial self-efficacy; Fear of business failure; Environmental disaster; Microcredit	INTIMATE-PARTNER VIOLENCE; POSTTRAUMATIC-STRESS-DISORDER; SOCIAL COGNITIVE THEORY; DOMESTIC VIOLENCE; MENTAL-HEALTH; NATURAL DISASTER; MULTIPLE TRAUMA; MICROFINANCE; RESILIENCE; ENTREPRENEURS		Domestic violence is the most prevalent form of gender-based violence that threatens the wellbeing and dignity of women. In this paper, we examine whether and how exposure to physical or sexual assault by male partners influences women's decision to initiate a new business when they have access to financing. We collected primary data from rural Bangladesh in collaboration with a microfinance inst…	[Shahriar, Abu Zafar M.] Monash Univ, Monash Business Sch, 900 Dandenong Rd, Caulfield, Vic 3145, Australia; [Shepherd, Dean A.] Univ Notre Dame, Mendoza Coll Business, 363C, Notre Dame, IN 46556 USA	Shahriar, AM (corresponding author), Monash Univ, Monash Business Sch, 900 Dandenong Rd, Caulfield, Vic 3145, Australia.	shahriar.abuzafar@monash.edu; dshephe1@nd.edu					Ahmed SM, 2005, J HEALTH POPUL NUTR, V23, P95; Aizer A, 2010, AM ECON REV, V100, P1847, DOI 10.1257/aer.100.4.1847; Anderson KM, 2012, VIOLENCE AGAINST WOM, V18, P1279, DOI 10.1177/1077801212470543; Arenius P, 2005, SMALL BUS ECON, V24, P233, DOI 10.1007/s11187-005-1984-x; Arora P, 2013, ENTREP THEORY PRACT, V37, P359, DOI 10.1111/j.1540-6520.2011.00472.x; Asiatic Society of Bangladesh, 2015, BAN…	131	4	4	24	42	ELSEVIER	AMSTERDAM	RADARWEG 29, 1043 NX AMSTERDAM, NETHERLANDS	0883-9026	1873-2003		J BUS VENTURING	J. Bus. Ventur.	NOV	2019	34	6
J	Argyrou, A; Hummels, H				Argyrou, Aikaterini; Hummels, Harry			Legal personality and economic livelihood of the Whanganui River: a call for community entrepreneurship	WATER INTERNATIONAL			English	Article						River; legal person; community entrepreneurship; social entrepreneurship; Maori; New Zealand	SOCIAL ENTREPRENEURSHIP; RIGHTS; CAPABILITIES; ANIMALS		Legislation in New Zealand dictates that the Whanganui River is a living entity and a legal person. Guardians uphold the river's environmental, social, cultural and economic well-being. We provide a conceptual discussion of the river's economic well-being, understood as the mutual enhancement of natural and human elements through community entrepreneurship that is based on human and non-human cap…	[Argyrou, Aikaterini] Nyenrode Business Univ, Ctr Entrepreneurship Governance & Stewardship, Breukelen, Netherlands; [Hummels, Harry] Univ Utrecht, Sch Econ, Utrecht, Netherlands	Argyrou, A (corresponding author), Nyenrode Business Univ, Ctr Entrepreneurship Governance & Stewardship, Breukelen, Netherlands.; Hummels, H (corresponding author), Univ Utrecht, Sch Econ, Utrecht, Netherlands.	a.argyrou2@nyenrode.nl; g.j.a.hummels@uu.nl					Bakker K., 2016, OXFORD HDB WATER POL, P407; Barczynski M, 2012, HEAD NECK CANC CLIN, P55, DOI 10.1007/978-81-322-2568-3_7; Bourdon P, 2010, AUSTR HUMANITIES REV, V49, P69, DOI DOI 10.22459/AHR; Burdon P., 2012, AUSTR J LEGAL PHILOS, V37, P28; CHAN AH, 1988, REV SOC ECON, V46, P46, DOI 10.1080/00346768800000003; CHAN AH, 1989, AM J ECON SOCIOL, V48, P193, DOI 10.1111/j.1536-7150.1989.tb02116.x; C…	61	4	4	1	3	ROUTLEDGE JOURNALS, TAYLOR & FRANCIS LTD	ABINGDON	2-4 PARK SQUARE, MILTON PARK, ABINGDON OX14 4RN, OXON, ENGLAND	0250-8060	1941-1707		WATER INT	Water Int.	37895	2019	44	44018
J	Torres, O; Thurik, R				Torres, Olivier; Thurik, Roy			Small business owners and health	SMALL BUSINESS ECONOMICS			English	Article						Small business owners; Entrepreneurship; Health; Well-being; Salutogenesis	SELF-EMPLOYMENT; EMPIRICAL-EXAMINATION; ENTREPRENEURS HEALTH; JOB INSECURITY; MEDIATING ROLE; STRESS; WORK; SENSE; SATISFACTION; COHERENCE		The present article identifies a societal and scholarly neglect for the field of small business ownership and health. We address health capital and its spillover effects and briefly outline a research program discriminating between pathogenic (negative for health) and salutogenic (positive for health) effects for a small business owner's working life.	[Torres, Olivier] Univ Montpellier, MRM, Montpellier, France; [Torres, Olivier; Thurik, Roy] Montpellier Business Sch, Labex Entreprendre, 2300 Ave Moulins, F-34185 Montpellier, France; [Thurik, Roy] Erasmus Univ, Erasmus Sch Econ, Dept Appl Econ, Rotterdam, Netherlands; [Thurik, Roy] Erasmus Univ, Inst Behav & Biol, Rotterdam, Netherlands	Thurik, R (corresponding author), Erasmus Univ, Erasmus Sch Econ, Dept Appl Econ, Rotterdam, Netherlands.	olivier.torres@univ-montp3.fr; thurik@ese.eur.nl	Thurik, Roy/A-9386-2012	Thurik, Roy/0000-0002-0242-6908			Ahmad SZ, 2009, AFR J BUS MANAGE, V3, P311; AKANDE A., 1994, J SMALL BUS MANAGE, V32, P83; ALGAVA Elisabeth, 2012, TRAVAIL EMPLOI, P5; Andersson P., 2008, J SOCIO-ECON, V37, P213, DOI DOI 10.1016/J.S0CEC.2007.03.003; [Anonymous], 2011, STRESS TRAVAIL SANTE; ANTONOVSKY A, 1993, SOC SCI MED, V36, P725, DOI 10.1016/0277-9536(93)90033-Z; Antonovsky A., 1987, JOSSEY BASS SOCIAL B; Antonovsky A, 1979, …	126	4	4	0	7	SPRINGER	DORDRECHT	VAN GODEWIJCKSTRAAT 30, 3311 GZ DORDRECHT, NETHERLANDS	0921-898X	1573-0913		SMALL BUS ECON	Small Bus. Econ. Group	AUG	2019	53	2
J	Kim, PH; Kotha, R; Fourne, SPL; Coussement, K				Kim, Phillip H.; Kotha, Reddi; Fourne, Sebastian P. L.; Coussement, Kristof			Taking leaps of faith: Evaluation criteria and resource commitments for early-stage inventions	RESEARCH POLICY			English	Article						Early-stage scientific inventions; Opportunity evaluation criteria; High-risk opportunities; Text analysis; Resource commitments; Entrepreneurial action	TECHNOLOGY-TRANSFER OFFICES; ALUMNI RESEARCH FOUNDATION; LINGUISTIC STYLE MATCHES; OPPORTUNITY EVALUATION; UNIVERSITY TECHNOLOGY; MEMBER PARTICIPATION; INFORMATION-CONTENT; PRIOR KNOWLEDGE; TEXT ANALYSIS; ENTREPRENEURIAL		Successfully developed academic inventions have the potential to spawn new technological domains, form the basis of thriving business ventures, and improve the well-being of society. However, evaluating whether an early-stage scientific invention truly has such potential is extremely difficult, and financially backing such inventions is highly risky. And yet, organizations and their evaluators st…	[Kim, Phillip H.] Babson Coll, Blank Ctr Entrepreneurship, 231 Forest Ave, Babson Pk, MA 02457 USA; [Kotha, Reddi] Singapore Management Univ, Lee Kong Chian Sch Business, 50 Stamford Rd, Singapore 178899, Singapore; [Fourne, Sebastian P. L.] Wilfrid Laurier Univ, Lazaridis Sch Business & Econ, 75 Univ Ave W,LH 4108, Waterloo, ON N2L 3C5, Canada; [Coussement, Kristof] IESEG Sch Management, LEM CNR…	Kim, PH (corresponding author), Babson Coll, Blank Ctr Entrepreneurship, 231 Forest Ave, Babson Pk, MA 02457 USA.	pkim1@babson.edu; reddikotha@smu.edu.sg; sfourne@wlu.ca; k.coussement@ieseg.fr		Coussement, Kristof/0000-0003-1346-9425; Kim, Phillip/0000-0002-3753-5047	Singapore Management UniversitySingapore Management University [12-C207-SMU-003]	We appreciate the many helpful comments and suggestions from our editors, Martin Kenney and Alex Coad, our reviewers, and other colleagues: Gregoire Croidieu, Gerry George, Denis Gregoire, Brad Hughes, Jennifer Jennings, Stelios Kavadias, Jonathan Kofman, Holger Patzelt, Tim Pollock, Olav Sorenson, Sudhir Voleti, Richard Whittington, and Johan Wiklund. We thank Adam Quek, Nikki Bown, Michael Enya…	Abbott H. P, 2008, CAMBRIDGE INTRO LIT; Ahuja G, 2001, STRATEGIC MANAGE J, V22, P521, DOI 10.1002/smj.176; Almor A, 2007, NEUROREPORT, V18, P1215, DOI 10.1097/WNR.0b013e32810f2e11; Alvarez SA, 2013, ORGAN SCI, V24, P301, DOI 10.1287/orsc.1110.0727; Antioco M, 2018, INT J INFORM MANAGE, V38, P301, DOI 10.1016/j.ijinfomgt.2017.10.009; Arndt F, 2018, IND CORP CHANGE, V27, P723, DOI 10.1093/icc/dty00…	123	4	4	5	21	ELSEVIER	AMSTERDAM	RADARWEG 29, 1043 NX AMSTERDAM, NETHERLANDS	0048-7333	1873-7625		RES POLICY	Res. Policy	JUL	2019	48	6
J	Kollmann, T; Stockmann, C; Kensbock, JM				Kollmann, Tobias; Stoeckmann, Christoph; Kensbock, Julia M.			I can't get no sleep-The differential impact of entrepreneurial stressors on work-home interference and insomnia among experienced versus novice entrepreneurs	JOURNAL OF BUSINESS VENTURING			English	Article						Stressors; Entrepreneurial experience; Recovery; Insomnia; Work-home interference	DEMANDS-RESOURCES MODEL; PSYCHOLOGICAL DETACHMENT; JOB-PERFORMANCE; SELF-EFFICACY; OPPORTUNITY RECOGNITION; RECOVERY EXPERIENCES; COPING STRATEGIES; MODERATING ROLE; SMARTPHONE USE; MINDFULNESS		When founding and managing a new business, entrepreneurs are frequently confronted with stressors hampering their daily work. The present study examines how these entrepreneurial stressors affect two important interrelated indicators of entrepreneurs' recovery and well-being-that is, their ability to detach from work during non-work times (work-home interference) and their sleep (insomnia). We in…	[Kollmann, Tobias] Univ Duisburg Essen, Dept Econ & Business Adm, Duisburg, Germany; [Stoeckmann, Christoph] Seeburg Castle Univ, Dept Management, Seekirchen Am Wallersee, Austria; [Kensbock, Julia M.] Maastricht Univ, Dept Org & Strategy, Sch Business & Econ, Maastricht, Netherlands	Kensbock, JM (corresponding author), Maastricht Univ, Sch Business & Econ, Tongersestr 53, NL-6200 Maastricht, Netherlands.	j.kensbock@maastrichtuniversity.nl		Kensbock, Julia M./0000-0001-8642-1938			AKERSTEDT T, 1994, J SLEEP RES, V3, P152, DOI 10.1111/j.1365-2869.1994.tb00122.x; Ames DR, 2006, J RES PERS, V40, P440, DOI 10.1016/j.jrp.2005.03.002; Barnes CM, 2012, PERS PSYCHOL, V65, P789, DOI 10.1111/peps.12002; Baron RA, 2006, MANAGE SCI, V52, P1331, DOI 10.1287/mnsc.1060.0538; Bennett AA, 2018, J ORGAN BEHAV, V39, P262, DOI 10.1002/job.2217; Bishop SR, 2004, CLIN PSYCHOL-SCI PR, V11, P230,…	125	4	4	7	17	ELSEVIER	AMSTERDAM	RADARWEG 29, 1043 NX AMSTERDAM, NETHERLANDS	0883-9026	1873-2003		J BUS VENTURING	J. Bus. Ventur.	JUL	2019	34	4
J	Rahman, M; Bose, S; Babu, MM; Dey, BL; Roy, SK; Binsardi, B				Rahman, Mizan; Bose, Sunny; Babu, Mujahid Mohiuddin; Dey, Bidit Lal; Roy, Sanjit Kumar; Binsardi, Ben			Value Co-Creation as a Dialectical Process: Study in Bangladesh and Indian Province of West Bengal	INFORMATION SYSTEMS FRONTIERS			English	Article						Dialectic co-creation; Smartphones; ICT for development; Smart technology	CORPORATE-SOCIAL-RESPONSIBILITY; ACTOR ENGAGEMENT; DOMINANT LOGIC; SERVICE LOGIC; INNOVATION; BOTTOM; DESTRUCTION; ENTREPRENEURSHIP; ADOPTION; TECHNOLOGY	9	The process by which technological innovation is adopted and diffused within an industry persists as a key research interest in the existing literature. Furthermore, the innovation and diffusion of ICT (information and communications technology) in general and smartphones in particular are viewed as a useful resource to support and foster socio-economic wellbeing in developing countries. As such,…	[Rahman, Mizan] Univ Lincoln, Mkt, Lincoln LN6 7TS, Lincs, England; [Bose, Sunny] ICFAI Fdn Higher Educ, IBS, Hyderabad, India; [Babu, Mujahid Mohiuddin] Coventry Univ, Sch Mkt & Management, Coventry Business Sch, Fac Business & Law, Coventry CV1 5FB, W Midlands, England; [Dey, Bidit Lal] Brunel Univ London, Brunel Business Sch, Kingston Lane Campus, London UB83PH, England; [Roy, Sanjit Kumar] Un…	Dey, BL (corresponding author), Brunel Univ London, Brunel Business Sch, Kingston Lane Campus, London UB83PH, England.	bidit.dey@brunel.ac.uk	Bose, Sunny/G-8568-2019	Dey, Bidit/0000-0002-0019-2124; Roy, Sanjit/0000-0003-4932-2222			Adhikari A, 2017, BUSINESS TODAY; Ahmed SS, 2012, J INFORM ENG APPL, V1, P16; Aker JC, 2010, J ECON PERSPECT, V24, P207, DOI 10.1257/jep.24.3.207; Alalwan AA, 2015, J FINANC SERV MARK, V20, P145, DOI 10.1057/fsm.2015.5; Alexander MJ, 2018, J SERV MANAGE, V29, P333, DOI 10.1108/JOSM-08-2016-0237; Angulo-Guerrero MJ, 2017, J BUS RES, V73, P30, DOI 10.1016/j.jbusres.2016.11.017; [Anonymous], 2007, E…	120	4	4	5	20	SPRINGER	DORDRECHT	VAN GODEWIJCKSTRAAT 30, 3311 GZ DORDRECHT, NETHERLANDS	1387-3326	1572-9419		INFORM SYST FRONT	Inf. Syst. Front.	JUN	2019	21	3
J	Liu, SB; Yan, MR				Liu, Shubo; Yan, Min-Ren			Corporate Sustainability and Green Innovation in an Emerging Economy-An Empirical Study in China	SUSTAINABILITY			English	Article						corporate sustainability; green innovation; institutional theory; China; emerging economy; qualitative research	PRODUCT INNOVATION; INSTITUTIONAL ENTREPRENEURSHIP; STRATEGIC CHOICE; PUBLIC-POLICY; SUPPLY CHAIN; FIRMS; ENVIRONMENT; TECHNOLOGY; ORGANIZATIONS; PERFORMANCE		Amid increased emphasis on sustainable development, understanding the sustainability initiative and practice of companies has attracted the attention of both academia and industry. Corporate sustainability combines triple values including environmental protection, social wellbeing, and economic benefit for companies. Drawing on institutional theory and employing an inductive case research method,…	[Liu, Shubo] Cent Univ Finance & Econ, Business Sch, Beijing 100083, Peoples R China; [Yan, Min-Ren] Chinese Culture Univ, Inst Int Business Adm, Taipei 106, Taiwan	Yan, MR (corresponding author), Chinese Culture Univ, Inst Int Business Adm, Taipei 106, Taiwan.	liushubo@cufe.edu.cn; mjyen@sce.pccu.edu.tw	jam, amir/O-6460-2019		Ministry of Science and Technology in TaiwanMinistry of Science and Technology, Taiwan	Part of this study were financially supported by the Ministry of Science and Technology in Taiwan.	Adamczyk S., 2009, P INT C DOCT CONS EV; Ahlstrom D., 2000, BUS HORIZONS, V43, P5, DOI DOI 10.1016/S0007-6813(00)87382-6; Ahlstrom D, 2008, J WORLD BUS, V43, P385, DOI 10.1016/j.jwb.2008.03.001; Ahlstrom D, 2014, J WORLD BUS, V49, P572, DOI 10.1016/j.jwb.2013.12.010; ALDRICH HE, 1994, ACAD MANAGE REV, V19, P645, DOI 10.2307/258740; Ameer R, 2012, J BUS ETHICS, V108, P61, DOI 10.1007/s10551-011-10…	107	4	4	6	23	MDPI	BASEL	ST ALBAN-ANLAGE 66, CH-4052 BASEL, SWITZERLAND	2071-1050			SUSTAINABILITY-BASEL	Sustainability	NOV	2018	10	11
J	Centgraf, S				Centgraf, Salina			Supporting civic engagement in German energy cooperatives - Transdisciplinary research based on the reflection of individual needs	ENERGY RESEARCH & SOCIAL SCIENCE			English	Article						Energy transition; Human Scale Development Approach; Energy cooperatives; Transdisciplinary research	RENEWABLE ENERGY; CITIZEN PARTICIPATION; SOCIAL ACCEPTANCE; GOVERNANCE; CONTEXT		Civic engagement is currently playing a major role in the transformation of European energy systems. In Germany, citizen-driven renewable energy cooperatives (RECs) are often presented as pioneers of change and as models for the development of energy initiatives within Europe. Current research on RECs focuses mainly on entrepreneurial adaptations and innovations; what is generally missing from th…	[Centgraf, Salina] UFZ Helmholtz Ctr Environm Res, Dept Environm Polit, Permoserstr 15, D-04318 Leipzig, Germany	Centgraf, S (corresponding author), UFZ Helmholtz Ctr Environm Res, Dept Environm Polit, Permoserstr 15, D-04318 Leipzig, Germany.	salina.centgraf@ufz.de			German Federal Ministry of Education and ResearchFederal Ministry of Education & Research (BMBF) [FKZ 03SF0458C]	The author wishes to thank Dr. Felix Rauschmayer for the substantial support of this work. I am grateful to the members of cooperatives who contributed to our studies and for the support provided by the research project 'EnGeno: transformation potentials of energy cooperatives' (www.engeno.net). EnGeno is a three-year project (2013-2016) funded by the German Federal Ministry of Education and Rese…	Bauwens T, 2017, ECOL ECON, V137, P163, DOI 10.1016/j.ecolecon.2017.03.006; Brummer V, 2018, ENERGY RES SOC SCI, V37, P111, DOI 10.1016/j.erss.2017.09.039; Brummer V, 2017, ANN PUBLIC COOP ECON, V88, P179, DOI 10.1111/apce.12159; Debor S., 2014, SOCIOECONOMIC POWER, P184; DGRV-Deutscher Genossenschafts-und Raiffeisenverband, 2016, ERG DGRV JAHR 31 12; Fraune C, 2015, ENERGY RES SOC SCI, V7, P55, …	47	4	4	1	12	ELSEVIER SCIENCE BV	AMSTERDAM	PO BOX 211, 1000 AE AMSTERDAM, NETHERLANDS	2214-6296	2214-6326		ENERGY RES SOC SCI	Energy Res. Soc. Sci.	OCT	2018	44
J	Khandelwal, P; Sehgal, A				Khandelwal, Preetam; Sehgal, Aakanksha			Exploring work-family interface for Indian women entrepreneurs	GENDER IN MANAGEMENT			English	Article						Women entrepreneurs (WEs); Support; Family-to-work conflict (FWC); Family-to-work enrichment (FWE); Work-to-family conflict (WFC); Work-to-family enrichment (WFE)	FEMALE ENTREPRENEURS; CONFLICT; ENRICHMENT; SUPPORT; SUCCESS; BALANCE; MOTIVATIONS; PERFORMANCE; VALIDATION; BENEFITS		Purpose The purpose of this paper is to study the nature of work-family interface for urban Indian women entrepreneurs (WEs), in terms of not only conflict but also enrichment. It also endeavours to examine the coping and support mechanisms that are used by the WEs. Design/methodology/approach This paper has adopted a qualitative design, employing in-depth interviews to gain an insight into the r…	[Khandelwal, Preetam; Sehgal, Aakanksha] Univ Delhi, Fac Management Studies, Delhi, India	Sehgal, A (corresponding author), Univ Delhi, Fac Management Studies, Delhi, India.	phd_aakanksha.s13@fms.edu					Adams GA, 1996, J APPL PSYCHOL, V81, P411, DOI 10.1037/0021-9010.81.4.411; Barnett RC, 2001, AM PSYCHOL, V56, P781, DOI 10.1037//0003-066X.56.10.781; Baron RA, 2002, RES ORGAN BEHAV, V24, P225, DOI 10.1016/S0191-3085(02)24007-1; Baron RA, 2008, ACAD MANAGE REV, V33, P328; Boden RJ, 1999, AM J ECON SOCIOL, V58, P71, DOI 10.1111/j.1536-7150.1999.tb03285.x; Brush C., 1992, ENTREP THEORY PRACT, V16, …	48	4	4	4	22	EMERALD GROUP PUBLISHING LTD	BINGLEY	HOWARD HOUSE, WAGON LANE, BINGLEY BD16 1WA, W YORKSHIRE, ENGLAND	1754-2413	1754-2421		GEND MANAG	Gend. Manag.		2018	33	3
J	Sofer, M; Saada, MAT				Sofer, Michael; Saada, M. A. Tzipi			Entrepreneurship of Women in the Rural Space in Israel: Catalysts and Obstacles to Enterprise Development	SOCIOLOGIA RURALIS			English	Article							FARM DIVERSIFICATION; BUSINESS; AGRICULTURE; ENGLAND; SKILLS		This article examines 100 women and their enterprises in moshav-type co-operative rural settlements in the rural-urban fringe of Tel-Aviv metropolitan area, Israel, and analyses the catalysts and obstacles to development and expansion of such enterprises. Most of the businesses are small, in the personal and service sector, and based on experience in past employment. The majority are located in h…	[Sofer, Michael; Saada, M. A. Tzipi] Bar Ilan Univ, Dept Geog & Environm, IL-5290002 Ramat Gan, Israel	Saada, MAT (corresponding author), Bar Ilan Univ, Dept Geog & Environm, IL-5290002 Ramat Gan, Israel.	soferm1@biu.ac.il; tzipisa@gmail.com					Alsos G. A., 2003, J SMALL BUSINESS ENT, V10, P435, DOI DOI 10.1108/14626000310504747; Alston M, 2004, AGR HUM VALUES, V21, P37, DOI 10.1023/B:AHUM.0000014019.84085.59; Anthopoulou T, 2010, J RURAL STUD, V26, P394, DOI 10.1016/j.jrurstud.2010.03.004; Applebaum L., 2012, HORIZ GEOGR, V79-80, P194; Barbieri C, 2009, J RURAL STUD, V25, P58, DOI 10.1016/j.jrurstud.2008.06.001; Bittner C, 2013, LAND U…	53	4	4	2	10	WILEY	HOBOKEN	111 RIVER ST, HOBOKEN 07030-5774, NJ USA	0038-0199	1467-9523		SOCIOL RURALIS	Sociol. Rural.	DEC	2017	57			1
J	Adiyia, B; De Rademaeker, S; Vanneste, D; Ahebwa, WM				Adiyia, Bright; De Rademaeker, Sarah; Vanneste, Dominique; Ahebwa, Wilber Manyisa			Understanding local entrepreneurship and small enterprises in the tourism-development nexus: The case of western Uganda	DEVELOPMENT SOUTHERN AFRICA			English	Article						Local entrepreneurship; small enterprises; tourism; regional development; western Uganda	POVERTY ALLEVIATION; ACCOMMODATION SECTOR; QUALITATIVE RESEARCH; DEVELOPING-COUNTRIES; REGIONAL-DEVELOPMENT; IMPACTS; EXPERIENCES; INNOVATION; LINKAGES; AFRICA		Most studies of the tourism-development nexus in developing countries tend to focus on short-term and monetary tourism effects, while understating non-monetary and longer-term effects of tourism on local and regional development. Although less tangible and weakly understood, non-monetary and/or long-term tourism effects can both reinforce and undermine short-term and monetary tourism effects. Thi…	[Adiyia, Bright; De Rademaeker, Sarah; Vanneste, Dominique] Univ Leuven KU Leuven, Dept Earth & Environm Sci, Celestijnenlaan 200E Bus 2409, B-3001 Leuven, Belgium; [Ahebwa, Wilber Manyisa] Makerere Univ, Dept Forestry Biodivers & Tourism, Kampala, Uganda	Adiyia, B (corresponding author), Univ Leuven KU Leuven, Dept Earth & Environm Sci, Celestijnenlaan 200E Bus 2409, B-3001 Leuven, Belgium.	bright.adiyia@ees.kuleuven.be					Adiyia B., 2017, Tourism and Hospitality Research, V17, P34, DOI 10.1177/1467358416634156; Adiyia B., 2015, Journal of Ecotourism, V14, P113; Adiyia B, 2014, TOUR HOSP RES, V14, P8, DOI 10.1177/1467358414529434; Anderson W, 2014, ARA J TOURISM RES, V3, P27; Ashley C, 2007, PROPOOR ANAL RWANDAN, V44; Ateljevic I., 2000, Journal of Sustainable Tourism, V8, P378, DOI 10.1080/09669580008667374; Atkin…	50	4	4	3	17	ROUTLEDGE JOURNALS, TAYLOR & FRANCIS LTD	ABINGDON	2-4 PARK SQUARE, MILTON PARK, ABINGDON OX14 4RN, OXON, ENGLAND	0376-835X	1470-3637		DEV SO AFR	Dev. South. Afr.	JAN	2017	34	1
J	Gooptu, N				Gooptu, Nandini			New Spirituality, Politics of Self-empowerment, Citizenship, and Democracy in Contemporary India	MODERN ASIAN STUDIES			English	Article									India has seen a recent upsurge in spiritual practices promoted by an entrepreneurial breed of leaders and organizations. Their primary preoccupation is not to preach religious faith and belief or to promote ritual practice, but to provide guidance on psychological and physical well-being, happiness, and a healthy lifestyle. They offer strategies for healing and re-energizing, and advocate self-m…	[Gooptu, Nandini] Univ Oxford St Antonys Coll, Oxford OX2 6JF, England	Gooptu, N (corresponding author), Univ Oxford St Antonys Coll, Oxford OX2 6JF, England.	nandini.gooptu@qeh.ox.ac.uk					Alter J., 2004, YOGA MODERN INDIA BO; Alter J S, 1997, Med Anthropol, V17, P309; Alter Joseph S., 2000, GANDHIS BODY SEX DIE; [Anonymous], 2006, BUSINESS LINE 0121; [Anonymous], 2006, OUTLOOK INDIA 0130; [Anonymous], 2010, DDI NEWS CHANNEL; [Anonymous], 2005, HINDU; [Anonymous], 2011, INDIA TODAY; [Anonymous], 2010, TIMES INDIA; [Anonymous], 2012, HINDUSTHAN TIME 0902; [Anonymous], 2007, SPIRITUA…	52	4	4	0	3	CAMBRIDGE UNIV PRESS	NEW YORK	32 AVENUE OF THE AMERICAS, NEW YORK, NY 10013-2473 USA	0026-749X	1469-8099		MOD ASIAN STUD	Mod. Asian Stud.	MAY	2016	50	3
J	Hodgson, N				Hodgson, Naomi			The Researcher and the Studier: On Stress, Tiredness and Homelessness in the University	JOURNAL OF PHILOSOPHY OF EDUCATION			English	Article									Recent European policy has seen a shift from a concern with lifelong learning in the Lisbon Strategy to research and innovation in the Horizon 2020 programme. Accordingly, there has been an increased policy focus on the researcher who, like the lifelong learner must be entrepreneurial, adaptable, mobile, but who must also find new ways in which to develop and deploy her skills and competences and…	[Hodgson, Naomi] Katholieke Univ Leuven, Lab Educ & Soc, Louvain, Belgium	Hodgson, N (corresponding author), Katholieke Univ Leuven, Lab Educ & Soc, Louvain, Belgium.	Naomi.Hodgson@ppw.kuleuven.be		Hodgson, Naomi/0000-0002-0171-4748	PESGB Large Grant	The author would like to thank the participants of the Leuven Research Community for their positive feedback and constructive comments on an earlier draft of this article. This research is funded by a PESGB Large Grant.	Agamben Giorgio, 1995, IDEA PROSE; Atkinson S, 2011, ENVIRON PLANN C, V29, P133, DOI 10.1068/c09200; Cavell S, 1992, SENSES WALDEN; Cavell Stanley, 2005, PHILOS DAY TOMORROW; D'Hoest F, 2015, ETHICS EDUC, V10, P49, DOI 10.1080/17449642.2014.998023; DELEUZE G, 1995, SUB-STANCE, P3; DesVos J, 2012, PSYCHOLOGISATION TIM; EU (European Union), 2013, INN UN POCK GUID EUR; Gardiner M., 2008, BALANCED RE…	22	4	4	0	7	WILEY	HOBOKEN	111 RIVER ST, HOBOKEN 07030-5774, NJ USA	0309-8249	1467-9752		J PHILOS EDUC	J. Philos. Educ.	FEB	2016	50	1
J	Bonfanti, A; Battisti, E; Pasqualino, L				Bonfanti, Angelo; Battisti, Enrico; Pasqualino, Luca			Social entrepreneurship and corporate architecture: evidence from Italy	MANAGEMENT DECISION			English	Article						Social entrepreneurship; Social value creation; Architectural innovation; Experiential corporate architecture; Italian industrial companies; Social entrepreneur	SHORT-TERMISM; ENTERPRISE; RESPONSIBILITY; BUSINESS; IDENTITY; DEBATE; ISSUES		Purpose - The purpose of this paper is to examine the contribution of corporate architecture to social value creation. It especially analyses the social effects of investments in experiential corporate architecture that have been carried out by Italian industrial companies. Design/methodology/approach - This study follows a qualitative approach. It is based on a survey and semi-structured in-dept…	[Bonfanti, Angelo] Univ Verona, Dept Business Adm, I-37100 Verona, Italy; [Battisti, Enrico] Univ Turin, Dept Management, Turin, Italy; [Pasqualino, Luca] Univ Roma La Sapienza, Dept Management, Piazzale Aldo Moro 5, I-00185 Rome, Italy	Bonfanti, A (corresponding author), Univ Verona, Dept Business Adm, I-37100 Verona, Italy.	angelo.bonfanti@univr.it					Accornero A., 1997, CASABELLA, V651/652, P4; Acs ZJ, 2013, SMALL BUS ECON, V40, P785, DOI 10.1007/s11187-011-9396-6; Alvord S. H., 2004, J APPL BEHAV SCI, V40, P260, DOI DOI 10.1177/0021886304266847; Astarita Rossano, 2000, ARCHITETTI OLIVETTI; Austin J, 2006, ENTREP THEORY PRACT, V30, P1, DOI 10.1111/j.1540-6520.2006.00107.x; Baccarani C, 2011, SINERGIE, V84, pVII; Bacq S, 2011, ENTREP REGION DE…	98	4	4	7	62	EMERALD GROUP PUBLISHING LTD	BINGLEY	HOWARD HOUSE, WAGON LANE, BINGLEY BD16 1WA, W YORKSHIRE, ENGLAND	0025-1747	1758-6070		MANAGE DECIS	Manag. Decis.		2016	54	2
J	Tirasattayapitak, S; Chaiyasain, C; Beeton, RJS				Tirasattayapitak, Sukhwan; Chaiyasain, Chainun; Beeton, R. J. S.			The impacts of nature-based adventure tourism on children in a Thai village	TOURISM MANAGEMENT PERSPECTIVES			English	Article						Nature-based adventure tourism; Impacts; Villagers; Children; Well-being; Sustainability; Culture	COMMUNITY; PARTICIPATION; PERCEPTIONS; ATTITUDES	10	We report on the introduction of nature-based adventure tourism into Ban Songpraek Village, Southern Thailand and its impacts on children. We find many positive benefits for village children with no evidence of cultural disruption or prurient impacts. The leadership and the social cohesiveness of villagers and their relationship with the village authorities and tourism entrepreneurs is a determin…	[Tirasattayapitak, Sukhwan] Prince Songkla Univ, Fac Hospitality & Tourism, Tourism Management, Phuket 83120, Thailand; [Chaiyasain, Chainun] Prince Songkla Univ, Fac Hospitality & Tourism, Hospitality Management, Phuket 83120, Thailand; [Beeton, R. J. S.] Univ Queensland, Sch Geog Planning & Environm Management, Brisbane, Qld 4072, Australia	Tirasattayapitak, S (corresponding author), Prince Songkla Univ, Fac Hospitality & Tourism, Phuket Campus,80 Moo 1 Vichitsongkram Rd, Phuket 83120, Thailand.	sukhwan.psu@gmail.com; cchaiyasain@gmail.com; r.beeton@uq.edu.au			Faculty of Hospitality and Tourism, Prince of Songkla University	The authors are grateful for the support of Mr. Bunrong Jaroonsawasdichai, the head of Ban Songpraek Village and his team members and the noteworthy contribution of the villagers, children and park managers in the field works. In addition, the authors wish to acknowledge the Faculty of Hospitality and Tourism, Prince of Songkla University for funding the research project.	Ashley P, 2006, AUSTRALAS J ENV MAN, V13, P70; Babbie E., 2004, PRACTICE SOCIAL RES; Balmford A, 2009, PLOS BIOL, V7, DOI 10.1371/journal.pbio.1000144; Bryman A., 2004, SOCIAL RES METHODS; Byrd E. T., 2009, J TOURISM MANAGEMENT, V30, P693; Carter R. W., 2004, Asia Pacific Journal of Tourism Research, V9, P423, DOI 10.1080/1094166042000311282; Carter R. W., 2008, CULTURAL HERITAGE TO, P134; Castle…	49	4	4	5	11	ELSEVIER	AMSTERDAM	RADARWEG 29, 1043 NX AMSTERDAM, NETHERLANDS	2211-9736	2211-9744		TOUR MANAG PERSPECT	Tour. Manag. Perspect.	JUL	2015	15
J	Smith, YJ; Stephenson, S; Gibson-Satterthwaite, M				Smith, Yda J.; Stephenson, Stephanie; Gibson-Satterthwaite, Michelle			The meaning and value of traditional occupational practice: A Karen woman's story of weaving in the United States	WORK-A JOURNAL OF PREVENTION ASSESSMENT & REHABILITATION			English	Article						Occupation; occupational deprivation; self-identity; empowerment; entrepreneurship	REFUGEES		This case study sought to understand the meaning of restoring traditional weaving as an occupation among Karen women from Burma who now live in an urban city in the United States and to examine the impact of weaving on their daily lives in terms of identity, empowerment, social support, and opportunities for entrepreneurship. The story of one Karen woman, Paw Law Eh, is described. Her story exemp…	[Smith, Yda J.] Univ Utah, Div Occupat Therapy, Coll Hlth, Salt Lake City, UT USA; [Stephenson, Stephanie] Univ Utah Inpatient Rehabil, Salt Lake City, UT USA; [Gibson-Satterthwaite, Michelle] Cardon Childrens Med Ctr, Mesa, AZ USA; [Gibson-Satterthwaite, Michelle] Horizon Pediat Therapy, Mesa, AZ USA	Smith, YJ (corresponding author), Div Occupat Therapy, 520 Wakara Way, Salt Lake City, UT 84108 USA.	yda.smith@hsc.utah.edu					Bhugra Dinesh, 2005, World Psychiatry, V4, P18; CHRISTIANSEN C, 1995, AM J OCCUP THER, V49, P1015; Christiansen C. H., 2010, INTRO OCCUPATION ART; COLEMAN JS, 1988, AM J SOCIOL, V94, pS95, DOI 10.1086/228943; Connor S. A., 2002, J OCCUPATIONAL SCI, V9, P82, DOI [10.1080/14427591.2002.9686496, DOI 10.1080/14427591.2002.9686496]; Creswell J. W., 2007, QUALITATIVE INQUIRY; Fisher GS, 2008, OCCUP THE…	23	4	5	1	10	IOS PRESS	AMSTERDAM	NIEUWE HEMWEG 6B, 1013 BG AMSTERDAM, NETHERLANDS	1051-9815	1875-9270		WORK	Work		2013	45	1
J	Rupasingha, A				Rupasingha, Anil			Value-Added Agricultural Enterprises and Local Economic Performance	REVIEW OF AGRICULTURAL ECONOMICS			English	Article							GROWTH; DETERMINANTS; CONVERGENCE; EMPLOYMENT; ENTREPRENEURSHIP; INDUSTRY; STATE		Proponents of value-added agricultural enterprises (VAAE) argue for favorable government policies and funds to promote these industries as a local development strategy. Though regularly advocated at all levels of government, the beliefs regarding the benefits of VAAE to local economies merit empirical investigation. A county-level analysis of the contiguous U.S. states for a ten-year time period …	New Mexico State Univ, Dept Agr Econ & Agr Business, Las Cruces, NM 88003 USA	Rupasingha, A (corresponding author), New Mexico State Univ, Dept Agr Econ & Agr Business, Las Cruces, NM 88003 USA.						Acs ZJ, 2004, REG STUD, V38, P911, DOI 10.1080/0034340042000280938; Anselin L, 1996, REG SCI URBAN ECON, V26, P77, DOI 10.1016/0166-0462(95)02111-6; Artz GM, 2007, AM J AGR ECON, V89, P557, DOI 10.1111/j.1467-8276.2007.01003.x; BARKEMA A, 1996, CONSOLIDATION CHANGE; BARKLEY DL, 1992, GROWTH CHANGE, V23, P239, DOI 10.1111/j.1468-2257.1992.tb00581.x; Barro R. J., 1995, EC GROWTH; Beck T, 2005, J EC…	41	4	4	0	19	WILEY	HOBOKEN	111 RIVER ST, HOBOKEN 07030-5774, NJ USA	1058-7195			REV AGR ECON	Rev. Agric. Econ.	FAL	2009	31	3
J	Carnevale, JB; Hatak, I				Carnevale, Joel B.; Hatak, Isabella			Employee adjustment and well-being in the era of COVID-19: Implications for human resource management	JOURNAL OF BUSINESS RESEARCH			English	Article						Human resource management; Employee adjustment; Well-being; Crisis; COVID-19	PERSON-ENVIRONMENT FIT; WORK-FAMILY CONFLICT; GRAND CHALLENGES; JOB; ENTREPRENEURSHIP; AUTONOMY; STIGMA; ORGANIZATION; METAANALYSIS; PERFORMANCE	1, 5	Today's organizations have to remain alert and adaptive to unforeseen events, such as external crises, which create increased uncertainty among their workforce and pose immediate threats to the organizations' performance and viability. However, with the recent COVID-19 pandemic, organizations suddenly have to navigate the unprecedented and thereby find new solutions to challenges arising across m…	[Carnevale, Joel B.] Syracuse Univ, Martin J Whitman Sch Management, Syracuse, NY 13244 USA; [Hatak, Isabella] Univ St Gallen, Swiss Res Inst Small Business & Entrepreneurship, Dufourstr 40a, CH-9000 St Gallen, Switzerland	Carnevale, JB (corresponding author), Syracuse Univ, Martin J Whitman Sch Management, Syracuse, NY 13244 USA.	jbcarnev@syr.edu; isabella.hatak@unisg.ch					Abma JC, 2006, J MARRIAGE FAM, V68, P1045, DOI 10.1111/j.1741-3737.2006.00312.x; Achor S., 2018, HARVARD BUS REV, P19; Aldrich HE, 2003, J BUS VENTURING, V18, P573, DOI 10.1016/S0883-9026(03)00011-9; Anderson N, 2010, GENDER WORK ORGAN, V17, P381, DOI 10.1111/j.1468-0432.2009.00461.x; Ashburn-Nardo L, 2017, SEX ROLES, V76, P393, DOI 10.1007/s11199-016-0606-1; Baron RA, 2010, J ORGAN BEHAV, V31, P…	65	3	3	98	98	ELSEVIER SCIENCE INC	NEW YORK	STE 800, 230 PARK AVE, NEW YORK, NY 10169 USA	0148-2963	1873-7978		J BUS RES	J. Bus. Res.	AUG	2020	116
J	Bujacz, A; Eib, C; Toivanen, S				Bujacz, Aleksandra; Eib, Constanze; Toivanen, Susanna			Not All Are Equal: A Latent Profile Analysis of Well-Being Among the Self-Employed	JOURNAL OF HAPPINESS STUDIES			English	Article						Well-being; Self-employment; Person-centered; Latent profile analysis	WORK-LIFE BALANCE; PSYCHOLOGICAL DISTRESS; ENTREPRENEURIAL EXIT; SLEEP DISTURBANCES; MENTAL-HEALTH; RATED HEALTH; STRESS; SATISFACTION; MORTALITY; INEQUALITIES	7	This study uses a person-centered approach to distinguish between subpopulations of self-employed individuals using multidimensional well-being indicators. Data were obtained from European Social Survey including a sample of 3461 self-employed individuals from 29 European countries. The analysis has empirically identified six distinct profiles named 'unhappy', 'languishing', 'happy', 'satisfied',…	[Bujacz, Aleksandra] Karolinska Inst, Dept Clin Neurosci, Div Psychol, Tomtebodavagen 18a, S-17177 Stockholm, Sweden; [Eib, Constanze] Uppsala Univ, Dept Psychol, Von Kraemers Alle 1A & 1C, S-75237 Uppsala, Sweden; [Toivanen, Susanna] Malardalen Univ, Acad Hlth Care & Social Welf, Vasteras, Sweden; [Toivanen, Susanna] Stockholm Univ, Dept Publ Hlth Sci, Stockholm, Sweden	Bujacz, A (corresponding author), Karolinska Inst, Dept Clin Neurosci, Div Psychol, Tomtebodavagen 18a, S-17177 Stockholm, Sweden.	aleksandra.bujacz@ki.se; constanze.eib@psyk.uu.se		Eib, Constanze/0000-0002-4921-4865; /0000-0002-6968-6157			Akerstedt T, 2002, J PSYCHOSOM RES, V53, P741, DOI 10.1016/S0022-3999(02)00333-1; Alesina A., 2001, 8198 NBER; Andersson P., 2008, J SOCIO-ECON, V37, P213, DOI DOI 10.1016/J.S0CEC.2007.03.003; Asparouhov T, 2014, STRUCT EQU MODELING, V21, P329, DOI 10.1080/10705511.2014.915181; Bakk Z, 2016, STRUCT EQU MODELING, V23, P278, DOI 10.1080/10705511.2015.1049698; Barlow DH, 2000, AM PSYCHOL, V55, P1247…	84	3	3	9	9	SPRINGER	DORDRECHT	VAN GODEWIJCKSTRAAT 30, 3311 GZ DORDRECHT, NETHERLANDS	1389-4978	1573-7780		J HAPPINESS STUD	J. Happiness Stud.	JUN	2020	21	5
J	Nikolaev, B; Boudreaux, CJ; Wood, M				Nikolaev, Boris; Boudreaux, Christopher John; Wood, Matthew			Entrepreneurship and Subjective Well-Being: The Mediating Role of Psychological Functioning	ENTREPRENEURSHIP THEORY AND PRACTICE			English	Article						entrepreneurship; self-employment; subjective well-being; psychological functioning	WORK-LIFE BALANCE; SELF-DETERMINATION THEORY; MATCHING ESTIMATORS; NEED SATISFACTION; JOB-SATISFACTION; PROPENSITY SCORE; HEALTH; OPPORTUNITY; HAPPINESS; EMPLOYMENT	11, 13	Well-being is an essential outcome of engagement in entrepreneurship, but the pathway from self-employment to well-being is poorly understood. To address this, we develop a model in which psychological functioning-purposeful engagement with life, realization of personal talents and capabilities, and fulfillment of intrinsic needs such as autonomy and competence-mediates the relationship between e…	[Nikolaev, Boris; Wood, Matthew] Baylor Univ, Dept Entrepreneurship, Hankamer Sch Business, Waco, TX 76798 USA; [Boudreaux, Christopher John] Florida Atlantic Univ, Coll Business, Econ, Boca Raton, FL 33431 USA	Boudreaux, CJ (corresponding author), Florida Atlantic Univ, Coll Business, 777 Glades Rd,KH 145, Boca Raton, FL 33431 USA.	cboudreaux@fau.edu		Boudreaux, Christopher/0000-0002-7098-7184			Abadie A, 2006, ECONOMETRICA, V74, P235, DOI 10.1111/j.1468-0262.2006.00655.x; Abadie A, 2011, J BUS ECON STAT, V29, P1, DOI 10.1198/jbes.2009.07333; AKANDE A., 1994, J SMALL BUS MANAGE, V32, P83; Alvarez SA, 2015, J BUS VENTURING, V30, P95, DOI 10.1016/j.jbusvent.2014.07.011; Austin PC, 2011, MULTIVAR BEHAV RES, V46, P119, DOI 10.1080/00273171.2011.540480; Bailey J, 2017, SMALL BUS ECON, V49, P6…	155	3	3	20	23	SAGE PUBLICATIONS INC	THOUSAND OAKS	2455 TELLER RD, THOUSAND OAKS, CA 91320 USA	1042-2587	1540-6520		ENTREP THEORY PRACT	Entrep. Theory Pract.	MAY	2020	44	3
J	Tingey, L; Larzelere, F; Goklish, N; Rosenstock, S; Mayo-Wilson, LJ; Pablo, E; Goklish, W; Grass, R; Sprengeler, F; Parker, S; Ingalls, A; Craig, M; Barlow, A				Tingey, Lauren; Larzelere, Francene; Goklish, Novalene; Rosenstock, Summer; Mayo-Wilson, Larissa Jennings; Pablo, Elliott; Goklish, Warren; Grass, Ryan; Sprengeler, Feather; Parker, Sean; Ingalls, Allison; Craig, Mariddie; Barlow, Allison			Entrepreneurial, Economic, and Social Well-Being Outcomes from an RCT of a Youth Entrepreneurship Education Intervention among Native American Adolescents	INTERNATIONAL JOURNAL OF ENVIRONMENTAL RESEARCH AND PUBLIC HEALTH			English	Article						Native American; adolescent; entrepreneurship education; randomized controlled trial; economic empowerment; qualitative	INDIAN ADOLESCENTS; ALCOHOL-USE; SUICIDE-PREVENTION; PROTECTIVE FACTORS; SUBSTANCE-ABUSE; RISK; CONNECTEDNESS; RESILIENCE; ASSETS; HOPELESSNESS	5	Background: Entrepreneurship education has demonstrated positive impacts in low-resource contexts. However, there is limited evidence of such programs evaluated among Native American (NA) youth in a rural reservation. Methods: A 2:1 randomized controlled trial evaluated the impact of the Arrowhead Business Group (ABG) entrepreneurship education program on entrepreneurship knowledge, economic empo…	[Tingey, Lauren; Rosenstock, Summer; Mayo-Wilson, Larissa Jennings; Ingalls, Allison; Barlow, Allison] Johns Hopkins Ctr Amer Indian Hlth, Dept Int Hlth, 415 N Washington St, Baltimore, MD 21231 USA; [Larzelere, Francene; Goklish, Novalene; Pablo, Elliott; Goklish, Warren; Grass, Ryan; Sprengeler, Feather; Parker, Sean; Craig, Mariddie] Johns Hopkins Ctr Amer Indian Hlth, Dept Int Hlth, 308 Kuper…	Tingey, L (corresponding author), Johns Hopkins Ctr Amer Indian Hlth, Dept Int Hlth, 415 N Washington St, Baltimore, MD 21231 USA.	ltingey1@jhu.edu; flarzel1@jhu.edu; ngoklis1@jhu.edu; summer.rosenstock@jhu.edu; ljmayowi@iu.edu; epablo1@jhu.edu; warrengoklish51@gmail.com; rgrass1@jhu.edu; fsprengeler@firstthingsfirst.org; seanduaneparker1@gmail.com; aingalls@jhu.edu; mariddie.ann@gmail.com; abarlow@jhu.edu			National Institutes of HealthUnited States Department of Health & Human ServicesNational Institutes of Health (NIH) - USA [U261IHS0080]; Barclays Bank	This research was funded by the National Institutes of Health, grant number U261IHS0080 and Barclays Bank.	Adamson R., 2002, NATIVE AM ENTREPRENE; Alcantara C, 2007, DEATH STUD, V31, P457, DOI 10.1080/07481180701244587; Banerjee A, 2004, AM ECON REV, V94, P326, DOI 10.1257/0002828041301902; Banerjee A, 2015, SCIENCE, V348, DOI 10.1126/science.1260799; Banerjee A, 2015, AM ECON J-APPL ECON, V7, P22, DOI 10.1257/app.20130533; Barlow A., 2019, BEHAV MENTAL HLTH OU; Barnett WS, 1995, FUTURE CHILD, V5, P25…	55	3	3	6	6	MDPI	BASEL	ST ALBAN-ANLAGE 66, CH-4052 BASEL, SWITZERLAND		1660-4601		INT J ENV RES PUB HE	Int. J. Environ. Res. Public Health	APR	2020	17	7
J	Escoto, BEB; Boza, MP; Madrigal, DF				Bernal Escoto, Blanca Estela; Portal Boza, Malena; Feito Madrigal, Duniesky			Sustainable Tourism: A Competitiveness Strategy Perspective in Baja California	SUSTAINABILITY			English	Article						sustainability; sustainable tourism; competitiveness and tourism competitiveness			Sustainability plays an important role in society by improving long-term quality of life, including future generations, seeking harmony between economic growth, social development and the protection of the environment. For decades, companies focused their efforts on maximizing returns for their stakeholders, setting aside the preservation of the environment by making indiscriminate use of local r…	[Bernal Escoto, Blanca Estela; Portal Boza, Malena; Feito Madrigal, Duniesky] Univ Autonoma Baja California, Fac Accounting & Adm, Tijuana 22427, BC, Mexico	Escoto, BEB (corresponding author), Univ Autonoma Baja California, Fac Accounting & Adm, Tijuana 22427, BC, Mexico.	blancab@uabc.edu.mx; mportal@uabc.edu.mx; duniesky.feito@uabc.edu.mx	Bernal, Blanca/F-6646-2019	Bernal, Blanca/0000-0002-8721-2561; FEITO MADRIGAL, DUNIESKY/0000-0001-7225-2598; PORTAL BOZA, MALENA/0000-0002-4237-1534			[Anonymous], 2019, BORD CROSS PEOPL TOT; [Anonymous], ESTR NAC TUR 2019 20; [Anonymous], TOUR CROSS; Batta R. N., 2016, INT J ENV SUSTAINABI, V5, P18, DOI DOI 10.24102/ijes.v5i1.660; Chiavenato I., 2017, STRATEGIC PLANNING, P337; Dupeyras A., 2013, OECD TOURISM PAPERS, V2, P14; Gastronomia, GO N; Gonzalez C., 2015, REV NOESIS, V24, P85; Institute of Statistics and Geography (INEGI), DIR NAC UN EC…	19	3	3	2	8	MDPI	BASEL	ST ALBAN-ANLAGE 66, CH-4052 BASEL, SWITZERLAND		2071-1050		SUSTAINABILITY-BASEL	Sustainability	DEC 2	2019	11	24
J	Pirson, M				Pirson, Michael			A Humanistic Perspective for Management Theory: Protecting Dignity and Promoting Well-Being	JOURNAL OF BUSINESS ETHICS			English	Article						Humanistic management; Economism; Humanism; Dignity; Well-being	SOCIAL ENTREPRENEURSHIP; ORGANIZATIONAL-BEHAVIOR; FIRM PERFORMANCE; BUSINESS; CAPABILITIES; ORIENTATION; FRAMEWORK; WELFARE; LABOR; HAPPINESS		The notion of dignity as that which has intrinsic value has arguably been neglected in economics and management despite its societal importance and eminent relevance in other social sciences. While management theory gained parsimony, this paper argues that the inclusion of dignity in the theoretical precepts of management theory will: (a) improve management theory in general, (b) align it more di…	[Pirson, Michael] Fordham Univ, 45 Columbus Ave, New York, NY 10023 USA	Pirson, M (corresponding author), Fordham Univ, 45 Columbus Ave, New York, NY 10023 USA.	pirson@fordham.edu					Aguinis H, 2008, J ORGAN BEHAV, V29, P139, DOI 10.1002/job.493; AKTOUF O, 1992, ACAD MANAGE REV, V17, P407, DOI 10.2307/258717; ALLEN WT, 1993, WASH LEE L REV, V50, P1395; ALSTON LJ, 1993, AM ECON REV, V83, P852; Alzola M, 2008, J BUS ETHICS, V78, P343, DOI 10.1007/s10551-006-9335-7; Anderson N, 1998, J ORGAN BEHAV, V19, P323, DOI 10.1002/(SICI)1099-1379(199807)19:4<323::AID-JOB912>3.3.CO;2-G; An…	151	3	3	8	14	SPRINGER	DORDRECHT	VAN GODEWIJCKSTRAAT 30, 3311 GZ DORDRECHT, NETHERLANDS	0167-4544	1573-0697		J BUS ETHICS	J. Bus. Ethics	SEP	2019	159	1
J	Abreu, M; Oner, O; Brouwer, A; van Leeuwen, E				Abreu, Maria; Oner, Ozge; Brouwer, Aleid; van Leeuwen, Eveline			Well-being effects of self-employment: A spatial inquiry	JOURNAL OF BUSINESS VENTURING			English	Article						Entrepreneurship; Well-being; Self-employment; Urban-rural; Neighbourhood effects	QUALITY-OF-LIFE; ECONOMIC-DEVELOPMENT; UNITED-STATES; SET-POINT; ENTREPRENEURSHIP; HAPPINESS; URBAN; INCOME; DETERMINANTS; PERSISTENCE	3, 11	Our paper presents an empirical analysis of entrepreneurial well-being using a large-scale longitudinal household survey from the UK that tracks almost 50,000 individuals across seven waves over the period 2009-2017, as well as a number of exploratory case studies. We contribute to the existing literature by investigating how entrepreneurial well-being varies across locations along the urban-rura…	[Abreu, Maria; Oner, Ozge] Univ Cambridge, Dept Land Econ, Cambridge, England; [Abreu, Maria] Univ Cambridge, Pembroke Coll, Cambridge, England; [Oner, Ozge] Res Inst Ind Econ IFN, Stockholm, Sweden; [Oner, Ozge] Ctr Entrepreneurship & Spatial Econ, Jonkoping, Sweden; [Brouwer, Aleid] Univ Groningen, Fac Spatial Sci, Groningen, Netherlands; [Brouwer, Aleid] NHL Stenden Univ Appl Sci, Acad Int Bus…	Abreu, M (corresponding author), Univ Cambridge, Dept Land Econ, Cambridge, England.	ma405@cam.ac.uk		Van Leeuwen, Eveline/0000-0002-3262-7030			Abel GA, 2016, BMJ OPEN, V6, DOI 10.1136/bmjopen-2016-012750; Acs ZJ, 2008, SMALL BUS ECON, V31, P219, DOI 10.1007/s11187-008-9135-9; Adams B., 2014, THESIS; Airey L, 2003, HEALTH PLACE, V9, P129, DOI 10.1016/S1353-8292(03)00013-3; Andersson M, 2016, J ECON GEOGR, V16, P39, DOI 10.1093/jeg/lbu049; Andersson M, 2011, J ECON GEOGR, V11, P179, DOI 10.1093/jeg/lbp069; Armington C, 2002, REG STUD, V36…	114	3	3	1	24	ELSEVIER	AMSTERDAM	RADARWEG 29, 1043 NX AMSTERDAM, NETHERLANDS	0883-9026	1873-2003		J BUS VENTURING	J. Bus. Ventur.	JUL	2019	34	4
J	Patel, PC; Wolfe, MT; Williams, TA				Patel, Pankaj C.; Wolfe, Marcus T.; Williams, Trenton A.			Self-employment and allostatic load	JOURNAL OF BUSINESS VENTURING			English	Article						Allostatic load; Coping; Self-employment; Stress	WORK STRESS; HEALTH CONSEQUENCES; COPING STRATEGIES; PERSONAL CONTROL; PHYSICAL HEALTH; JOB DEMANDS; HEART-RATE; FAMILY; ENTREPRENEURS; SATISFACTION	5	Self-employment can be stressful and its long-term effects on individual health could be significant; yet, the physiological outcomes of self-employment related stress remain under-explored. Drawing on allostatic load as a long-term biological consequence of physiological wear and-tear and an indicator of stress response, we use three different studies to provide a more nuanced understanding of t…	[Patel, Pankaj C.] Villanova Univ, 800 E Lancaster Ave, Villanova, PA 19085 USA; [Wolfe, Marcus T.] Univ Oklahoma, Price Coll Business, 307 W Brooks St, Norman, OK 73069 USA; [Williams, Trenton A.] Indiana Univ, Kelley Sch Business, 1275 E 10th St, Bloomington, IN 47405 USA	Wolfe, MT (corresponding author), Univ Oklahoma, Price Coll Business, 307 W Brooks St, Norman, OK 73069 USA.	pankaj.patel@villanova.edu; mtwolfe@ou.edu; trenwill@iu.edu			Economic and Social Research CouncilEconomic & Social Research Council (ESRC); NIH National Center for Advancing Translational Sciences (NCATS) Clinical and Translational Science Award (CTSA) program [UL1TR001409, UL1TR001881, 1UL1RR025011]; John D. and Catherine T. MacArthur Foundation Research Network National Institute on Aging [P01-AG020166]; National institute on AgingUnited States Departmen…	The data in Study 1 is from Understanding Society, an initiative funded by the Economic and Social Research Council and various Government Departments, with scientific leadership by the Institute for Social and Economic Research, University of Essex, and survey delivery by NatCen Social Research and Kantar Public. The research data are distributed by the UK Data Service.; The MIDUS I and II studi…	Alberti KGMM, 1998, DIABETIC MED, V15, P539, DOI 10.1002/(SICI)1096-9136(199807)15:7<539::AID-DIA668>3.0.CO;2-S; Austenfeld JL, 2004, J PERS, V72, P1335, DOI 10.1111/j.1467-6494.2004.00299.x; Baron RA, 2016, J MANAGE, V42, P742, DOI 10.1177/0149206313495411; Baumann N, 2005, J PERS SOC PSYCHOL, V89, P781, DOI 10.1037/0022-3514.89.5.781; Baumeister RF, 1991, ESCAPING SELF ALCOHO; BEEHR TA, 1978, P…	127	3	3	1	6	ELSEVIER	AMSTERDAM	RADARWEG 29, 1043 NX AMSTERDAM, NETHERLANDS	0883-9026	1873-2003		J BUS VENTURING	J. Bus. Ventur.	JUL	2019	34	4
J	Nordenmark, M; Hagqvist, E; Vinberg, S				Nordenmark, Mikael; Hagqvist, Emma; Vinberg, Stig			Sickness Presenteeism among the Self-employed and Employed in Northwestern Europed-The Importance of Time Demands	SAFETY AND HEALTH AT WORK			English	Article						Northwestern Europe; Organizationally employed; Self-employed; Sickness presenteeism; Time demands	WORK-RELATED FACTORS; HEALTH CONDITIONS; JOB DEMANDS; ENTREPRENEURS; ABSENTEEISM; PREVALENCE; WORKPLACE; ABSENCE; ILL	14	Background: European policymakers encourage individuals to become self-employed because it is a way to promote innovation and job creation. It can be assumed that health and well-being among the self-employed and managers in small-scale enterprises are particularly crucial in this enterprise group because the smallness of the enterprise makes its members vulnerable. Earlier studies have indicated…	[Nordenmark, Mikael; Hagqvist, Emma; Vinberg, Stig] Mid Sweden Univ, Dept Hlth Sci, S-83125 Ostersund, Sweden	Nordenmark, M (corresponding author), Mid Sweden Univ, Dept Hlth Sci, S-83125 Ostersund, Sweden.	Mikael.nordenmark@miun.se			Swedish Work Environment Authority [2016001121]	This work was supported by the Swedish Work Environment Authority under grant number Dnr 2016001121.	Aronsson G, 2005, J OCCUP ENVIRON MED, V47, P958, DOI 10.1097/01.jom.0000177219.75677.17; Bergstrom G, 2009, J OCCUP ENVIRON MED, V51, P629, DOI [10.1097/JOM.0b913e3181a8281b, 10.1097/JOM.0b013e3181a8281b]; Collins JJ, 2005, J OCCUP ENVIRON MED, V47, P547, DOI 10.1097/01.jom.0000166864.58664.29; d'Errico A, 2016, AM J IND MED, V59, P57, DOI 10.1002/ajim.22522; Deery S, 2014, J OCCUP ORGAN PSYCH, …	32	3	3	0	1	ELSEVIER SCIENCE BV	AMSTERDAM	PO BOX 211, 1000 AE AMSTERDAM, NETHERLANDS	2093-7911	2093-7997		SAF HEALTH WORK-KR	Saf. Health Work	JUN	2019	10	2
J	Bartleet, BL; Ballico, C; Bennett, D; Bridgstock, R; Draper, P; Tomlinson, V; Harrison, S				Bartleet, Brydie-Leigh; Ballico, Christina; Bennett, Dawn; Bridgstock, Ruth; Draper, Paul; Tomlinson, Vanessa; Harrison, Scott			Building sustainable portfolio careers in music: insights and implications for higher education	MUSIC EDUCATION RESEARCH			English	Article						Portfolio careers; Protean careers; career trajectories; music; graduate outcomes; higher education	CREATIVE LABOR; ARTISTS	1, 10	This article discusses a range of significant issues for consideration by music higher education institutions when preparing their students for a portfolio career in music. Drawing on insights from a review of literature undertaken as part of an Australian Research Council Linkage Project, Making Music Work: Sustainable portfolio careers for Australian musicians, the article explores the dynamic …	[Bartleet, Brydie-Leigh; Ballico, Christina; Draper, Paul; Tomlinson, Vanessa; Harrison, Scott] Griffith Univ, Queensland Conservatorium Res Ctr, Brisbane, Qld, Australia; [Bennett, Dawn] Curtin Univ, Higher Educ, Perth, WA, Australia; [Bennett, Dawn] Curtin Univ, Employ ABIL & Creat Workforce Initiat, Perth, WA, Australia; [Bridgstock, Ruth] Griffith Univ, Ctr Learning Futures, Brisbane, Qld, Au…	Bartleet, BL (corresponding author), Griffith Univ, Queensland Conservatorium Res Ctr, Brisbane, Qld, Australia.	b.bartleet@griffith.edu.au	Bennett, Dawn/A-7210-2009	Bennett, Dawn/0000-0002-0676-1623; Bartleet, Brydie-Leigh/0000-0003-4346-780X; tomlinson, vanessa/0000-0001-6712-0013; Bridgstock, Ruth/0000-0003-0072-2815	Australian Research CouncilAustralian Research Council [LP150100497]	This work was supported by Australian Research Council [LP150100497].	Armstrong V, 2013, WOMEN, V24, P298, DOI 10.1080/09574042.2013.850598; Australian Bureau of Statistics, 2011 CENS HOUS FORM; Ballico C., 2013, BURY ME DEEP ISOLATI; Bartleet B.-L., 2012, AUSTR J MUSIC ED, V1, P32; Bartleet B.-L., 2018, OXFORD HDB COMMUNITY, P1, DOI DOI 10.1093/OXFORDHB/9780190219505.001.0001; Bartleet Brydie-Leigh, 2012, SOUND LINKS COMMUNIT; Baumol WJ, 2012, KYKLOS, V65, P313, D…	79	3	3	2	9	ROUTLEDGE JOURNALS, TAYLOR & FRANCIS LTD	ABINGDON	2-4 PARK SQUARE, MILTON PARK, ABINGDON OX14 4RN, OXON, ENGLAND	1461-3808	1469-9893		MUSIC EDUC RES	Music Educ. Res.	46508	2019	21	3
J	Mensmann, M; Frese, M				Mensmann, Mona; Frese, Michael			Who stays proactive after entrepreneurship training? Need for cognition, personal initiative maintenance, and well-being	JOURNAL OF ORGANIZATIONAL BEHAVIOR			English	Article						entrepreneurship; maintenance; need for cognition; personal initiative; proactive behavior; training; well-being	SELF-EFFICACY; SMALL BUSINESS; THINGS HAPPEN; SPECIAL-ISSUE; WORK; BEHAVIOR; JOB; PERFORMANCE; MODEL; SKILL	1, 2, 6	Personal initiative training is a promising way to increase entrepreneurial personal initiative, which is a key behavior for successful entrepreneurship. Although personal initiative training has been shown to promote personal initiative, little is known about how this proactive behavior can be maintained over time and what the consequences are. The training transfer literature suggests that trai…	[Mensmann, Mona] Univ Warwick, Warwick Business Sch, Coventry CV4 7AL, W Midlands, England; [Frese, Michael] Natl Univ Singapore, NUS Business Sch, Dept Management & Org, Singapore, Singapore; [Frese, Michael] Leuphana Univ Luneburg, Luneburg, Germany	Mensmann, M (corresponding author), Univ Warwick, Warwick Business Sch, Coventry CV4 7AL, W Midlands, England.	mona.mensmann@wbs.ac.uk	Frese, Michael/B-3283-2014	Frese, Michael/0000-0002-6462-4395	World BankThe World Bank India	World Bank	Acs ZJ, 2008, SMALL BUS ECON, V31, P219, DOI 10.1007/s11187-008-9135-9; Aiken L. S., 1991, MULTIPLE REGRESSION; Arthur W, 1998, HUM PERFORM, V11, P57, DOI 10.1207/s15327043hup1101_3; Baer M, 2003, J ORGAN BEHAV, V24, P45, DOI 10.1002/job.179; BALDWIN TT, 1988, PERS PSYCHOL, V41, P63, DOI 10.1111/j.1744-6570.1988.tb00632.x; BATEMAN TS, 1993, J ORGAN BEHAV, V14, P103, DOI 10.1002/job.4030140202; Ba…	108	3	3	11	44	WILEY	HOBOKEN	111 RIVER ST, HOBOKEN 07030-5774, NJ USA	0894-3796	1099-1379		J ORGAN BEHAV	J. Organ. Behav.	JAN	2019	40	1
J	Reynoso, J; Cabrera, K				Reynoso, Javier; Cabrera, Karla			Managing informal service organizations at the base of the pyramid (BoP)	JOURNAL OF SERVICES MARKETING			English	Article						Qualitative research; Content analysis; Base of the pyramid; Informal services	SYSTEMS; ENTREPRENEURSHIP; AGENDA		Purpose - This paper aims to explore and learn about managerial practices of informal services at the base of the pyramid (BoP). Design/methodology/approach - The study reports findings of an empirical research conducted in 16 cities in Mexico during a two-year period. Managerial practices in 327 micro-businesses were identified and analyzed after conducting direct observation and personal interv…	[Reynoso, Javier; Cabrera, Karla] Tecnol Monterrey, EGADE Business Sch, Monterrey, Mexico	Reynoso, J (corresponding author), Tecnol Monterrey, EGADE Business Sch, Monterrey, Mexico.	jreynoso@itesm.mx; karla.cabrera@itesm.mx					Anderson L, 2013, J BUS RES, V66, P1203, DOI 10.1016/j.jbusres.2012.08.013; Arnold DG, 2013, J BUS RES, V66, P1904, DOI 10.1016/j.jbusres.2013.02.012; Barile S, 2016, J SERV MANAGE, V27, P652, DOI 10.1108/JOSM-09-2015-0268; Baron S, 2018, J SERV RES-US, V21, P135, DOI 10.1177/1094670517738372; Barratt M, 2011, J OPER MANAG, V29, P329, DOI 10.1016/j.jom.2010.06.002; Blankson C., 2002, MARK INTELL …	71	3	3	1	4	EMERALD GROUP PUBLISHING LTD	BINGLEY	HOWARD HOUSE, WAGON LANE, BINGLEY BD16 1WA, W YORKSHIRE, ENGLAND	0887-6045			J SERV MARK	J. Serv. Mark.		2019	33	1
J	Vossenberg, S				Vossenberg, Saskia			Frugal Innovation Through a Gender Lens: Towards an Analytical Framework	EUROPEAN JOURNAL OF DEVELOPMENT RESEARCH			English	Article						frugal innovation; gender lens; inclusive development; impact evaluation	WOMENS EMPOWERMENT; SUSTAINABLE DEVELOPMENT; THEORETICAL FRAMEWORK; INCLUSIVE DEVELOPMENT; CAPABILITY APPROACH; RESEARCH AGENDA; INSTITUTIONS; INEQUALITY; ENTREPRENEURSHIP; ENTERPRISE		This article analyzes the role of frugal innovation in inclusive development through a gender lens. It explores frugal innovation processes as a potential means to empowerment and enhanced well-being of marginalized women. The presented analytical framework balances the need for evaluating whether frugal innovation delivers direct demonstrable value to the lives of marginalized women and where an…	[Vossenberg, Saskia] Erasmus Univ, Rotterdam Int Inst Social Studies, NL-2502 LT The Hague, Netherlands	Vossenberg, S (corresponding author), Erasmus Univ, Rotterdam Int Inst Social Studies, NL-2502 LT The Hague, Netherlands.	saskiavossenberg@gmail.com		Vossenberg, Saskia/0000-0002-7707-2227			Addabbo T, 2010, J HUM DEV CAPABIL, V11, P479, DOI 10.1080/19452829.2010.520900; Agarwal B, 1994, FIELD ONES OWN GENDE, V58; Agarwal B., 1997, FEMINIST EC, V3, P1, DOI DOI 10.1080/135457097338799; Agarwal N., 2012, ENG TECHN INN ICE 20, P1, DOI DOI 10.1109/ICE.2012.6297683; Al-Dajani H, 2013, INT J ENTREP BEHAV R, V19, P503, DOI 10.1108/IJEBR-10-2011-0138; Alsop Ruth, 2005, MEASURING EMPOWERMEN, …	63	3	3	3	19	PALGRAVE MACMILLAN LTD	BASINGSTOKE	BRUNEL RD BLDG, HOUNDMILLS, BASINGSTOKE RG21 6XS, HANTS, ENGLAND	0957-8811	1743-9728		EUR J DEV RES	Eur. J. Dev. Res.	JAN	2018	30	1
J	Andersen, J				Andersen, Jim			What about the employees in entrepreneurial firms? A multi-level analysis of the relationship between entrepreneurial orientation, role ambiguity, and social support	INTERNATIONAL SMALL BUSINESS JOURNAL-RESEARCHING ENTREPRENEURSHIP			English	Article						employee well-being; entrepreneurial orientation; hierarchical linear modeling; role ambiguity; small and medium-sized enterprises; social exchange theory	PERCEIVED ORGANIZATIONAL SUPPORT; LEADER-MEMBER EXCHANGE; PERFORMANCE WORK SYSTEMS; LAISSEZ-FAIRE LEADERSHIP; ROLE-CONFLICT; JOB-PERFORMANCE; DECISION-MAKING; STRATEGIC ENTREPRENEURSHIP; CORPORATE ENTREPRENEURSHIP; EMPIRICAL-EXAMINATION		Research on entrepreneurial orientation (EO) has mainly addressed outcomes of EO at the level of the firm. However, few studies have examined how EO affects employees. Using a multi-level analysis of 343 employees nested in 25 small and medium-sized enterprises (SMEs) the analysis presented shows that EO will increase the degree of role ambiguity among employees. Social support from management wa…	[Andersen, Jim] Univ Skovde, Sch Business, Business Adm, Skovde, Sweden	Andersen, J (corresponding author), Univ Skovde, Sch Business, POB 408, SE-54128 Skovde, Sweden.	jim.andersen@his.se			Swedish Research Council for Health, Working Life and Welfare (FORTE) [2012-1067]	The author(s) disclosed receipt of the following financial support for the research, authorship, and/or publication of this article: This research was supported by a grant from the Swedish Research Council for Health, Working Life and Welfare (FORTE). Grant number: 2012-1067.	ABDELHALIM AA, 1982, J OCCUP BEHAV, V3, P281, DOI 10.1002/job.4030030403; ABRAMIS DJ, 1994, PSYCHOL REP, V75, P1411, DOI 10.2466/pr0.1994.75.3f.1411; ALVAREZ SA, 2002, STRATEG ENTREP J, P89; Andersen J, 2010, INT J ENTREP BEHAV R, V16, P309, DOI 10.1108/13552551011054507; Anderson BS, 2015, STRATEGIC MANAGE J, V36, P1579, DOI 10.1002/smj.2298; Basu R, 1997, J APPL SOC PSYCHOL, V27, P477, DOI 10.1…	137	3	3	3	53	SAGE PUBLICATIONS LTD	LONDON	1 OLIVERS YARD, 55 CITY ROAD, LONDON EC1Y 1SP, ENGLAND	0266-2426	1741-2870		INT SMALL BUS J	Int. Small Bus. J.-Res. Entrep.	DEC	2017	35	8
J	Farrington, SM				Farrington, S. M.			Psychological well-being and perceived financial performance: An SME perspective	SOUTH AFRICAN JOURNAL OF BUSINESS MANAGEMENT			English	Article							ENTREPRENEURIAL ORIENTATION; WORK; HAPPINESS		Psychological well-being is influenced by the "surrounding contexts of people's lives" and has consistently been found to be associated with positive outcomes. Given the turbulent surrounding contexts facing SME owners in South Africa, the primary objective of this study was to investigate their level of psychological well-being and to establish the influence thereof on the fmancial performance o…	[Farrington, S. M.] Nelson Mandela Univ, South Campus,POB 77000, ZA-6031 Port Elizabeth, South Africa	Farrington, SM (corresponding author), Nelson Mandela Univ, South Campus,POB 77000, ZA-6031 Port Elizabeth, South Africa.	shelley.farrington@mandela.ac.za					Ahmad N.H., 2010, INT BUSINESS MANAGEM, V4, P67, DOI DOI 10.3923/IBM; [Anonymous], 2016, RYFFS SCAL INF UNPUB; Avey J.B., 2010, IMPACT POSITIVE PSYC; Baron RA, 2008, ACAD MANAGE REV, V33, P328; Bevan S, 2010, THE WORK FDN, V10, P3; BOSCH J., 2011, BUSINESS MANAGEMENT; Carr D, 2002, SOC PSYCHOL QUART, V65, P103, DOI 10.2307/3090096; Carr D., 2004, HLTH ARE WE NATL STU; Conway JM, 2010, J BUS PSYCH…	65	3	3	0	12	AOSIS	CAPE TOWN	POSTNET SUITE 55, PRIVATE BAG X22, TYGERVALLEY, CAPE TOWN, 00000, SOUTH AFRICA	2078-5585	2078-5976		S AFR J BUS MANAG	S. Afr. J. Bus. Manag.	DEC	2017	48	4
J	Obraztsova, OI; Popovskaya, EV				Obraztsova, O., I; Popovskaya, E., V			AN ESSAY ON THE MULTIDIMENSIONAL STATISTICAL METHODS TO CHARACTERIZE THE ENTREPRENEURIAL CONTEXT IN RUSSIAN REGIONS	SOTSIOLOGICHESKIE ISSLEDOVANIYA			Russian	Article						entrepreneurial activity; entrepreneurship research; contextual approach; multidimensional statistical methods; factor analysis; cluster analysis; cross-regional comparisons; entrepreneurial framework conditions	PERSPECTIVES		This paper constructs a multidimensional typology that captures the contextual feature of Entrepreneurial Framework Conditions (EFC) across Russian regions. An overview of entrepreneurship research priorities in last decades shows that entrepreneurship's nature, extent and contribution to economic growth depend on the context in which it occurs. Contextual approach provides a deeper insight into …	[Obraztsova, O., I] Lomonosov Moscow State Univ, Moscow Sch Econ, Moscow, Russia; [Popovskaya, E., V] Natl Res Univ, Higher Sch Econ, Lab Entrepreneurship Res, Moscow, Russia	Obraztsova, OI (corresponding author), Lomonosov Moscow State Univ, Moscow Sch Econ, Moscow, Russia.	olga_obraztsova@rambler.ru; e_po-povskaya@rambler.ru		Obraztsova, Olga/0000-0002-7294-4719	Science Foundation of the National Research University Higher School of Economics [12]	This research was supported by the Science Foundation of the National Research University Higher School of Economics via grant No 12 "The influence of the budget and tax policies on entrepreneurial potential in a region".	Aidis R, 2008, J BUS VENTURING, V23, P656, DOI 10.1016/j.jbusvent.2008.01.005; Bergey Paul K., 2014, IEEE Engineering Management Review, V42, DOI 10.1109/EMR.2014.2314538; Chepurenko AY, 2012, ZH NOVAYA EKON ASSOT, P102; Chepurenko A.Yu., 2012, ROSSIYA 1 KITAJ IZME, P168; Chepurenko A. Yu, 2013, SOTSIOL ISSLED+, P32; DAVIDSON D, 2001, INQUIRIES TRUTH INTE, P183, DOI DOI 10.1093/0199246297.001.000…	26	3	4	1	4	MEZHDUNARODNAYA KNIGA	MOSCOW	39 DIMITROVA UL., MOSCOW, 113095, RUSSIA	0132-1625			SOTSIOL ISSLED+	Sotsiologicheskie Issled.		2017		4
J	Anderson, KB; Saxton, GD				Anderson, Kenton Bruce; Saxton, Gregory D.			Smiles, Babies, and Status Symbols: The Persuasive Effects of Image Choices in Small-Entrepreneur Crowdfunding Requests	INTERNATIONAL JOURNAL OF COMMUNICATION			English	Article						crowdfunding; computer-mediated communication; Duchenne smile; impression management; microfinance; new media; nonprofit organizations; peer-to-peer lending; prosocial behavior; self-presentation; social lending; visual communication	DECISION-MAKING; TRUST; COMMUNICATION; DETERMINANTS; MICROFINANCE; EXPRESSION; EMOTION; PEER	10	This article examines the persuasive effects of images in the context of online peer-to-peer microfinance. The theoretical framework-based in self-presentation and impression management-relates micro-entrepreneurs' loan-request image choices to lending decisions and lenders' perceptions of the borrower's trustworthiness and need. We explore effects of three specific visuals: (1) genuine enjoyment…	[Anderson, Kenton Bruce; Saxton, Gregory D.] SUNY Buffalo, Buffalo, NY 14228 USA	Anderson, KB (corresponding author), SUNY Buffalo, Buffalo, NY 14228 USA.	kba2@buffalo.edu; gdsaxton@buffalo.edu					Altschuller S, 2010, J COMPUT-MEDIAT COMM, V16, DOI 10.1111/j.1083-6101.2010.01529.x; Barge JK, 2008, J APPL COMMUN RES, V36, P251, DOI 10.1080/00909880802172277; Batson C. D., 1991, ALTRUISM QUESTION SO; Bekkers R, 2011, NONPROF VOLUNT SEC Q, V40, P924, DOI 10.1177/0899764010380927; Birdsell D. S., 1996, ARGUMENTATION ADVOCA, V33, P1; Black S, 2013, J HUM RIGHTS, V12, P103, DOI 10.1080/14754835.…	53	3	3	0	39	USC ANNENBERG PRESS	LOS ANGELES	UNIV SOUTHERN CALIFORNIA, KERCKHOFF HALL, 734 W ADAMS BLVD, MC7725, LOS ANGELES, CA 90089 USA	1932-8036			INT J COMMUN-US	Int. J. Commun.		2016	10
J	Khefacha, I; Belkacem, L				Khefacha, Islem; Belkacem, Lotfi			Technology-based ventures and sustainable development: Cointegrating and causal relationships with a panel data approach	JOURNAL OF INTERNATIONAL TRADE & ECONOMIC DEVELOPMENT			English	Article						technology entrepreneurship; sustainable economic growth; GEM; cointegration tests; vector error correction model	UNIT-ROOT TESTS; REGIONAL-DEVELOPMENT; BUSINESS FORMATION; ECONOMIC-GROWTH; ENTREPRENEURSHIP; TIME; INNOVATION; MODEL; PATH		The aim of this article is to provide new empirical evidence on the causality between proxy variables of technology entrepreneurship and proxy variable of sustainable economic performance in a vector error correction model. It covers a sample of 13 countries participated to Global Entrepreneurship Monitor studies under the period 2002-2013. Building on a theoretical background that considers the …	[Khefacha, Islem; Belkacem, Lotfi] Univ Sousse, Lab Res Econ Management & Quantitat Finance, IHEC, Sousse 4054, Tunisia	Khefacha, I (corresponding author), Univ Sousse, Lab Res Econ Management & Quantitat Finance, IHEC, Sousse 4054, Tunisia.	Islem.Khefacha@fsegma.rnu.tn	Islem, Khefacha/AAR-6939-2020; Belkacem, Lotfi/AAT-7998-2020; KHEFACHA, Islem/AAR-6946-2020	KHEFACHA, Islem/0000-0002-5636-0692	Global Entrepreneurship Research Association (GERA)	Global Entrepreneurship Research Association (GERA).	Abdullah S., 2011, P INT C BUS EC RES S, P144; Abdullah S, 2008, ASIAN J TECHNOL INNO, V16, P101, DOI 10.1080/19761597.2008.9668649; Acs Z.J., 2006, INNOVATIONS TECHNOLO, V1, P97, DOI DOI 10.1162/ITGG.2006.1.1.97; Acs Z. J., 2003, HDB ENTREPRENEURSHIP, V1, P55, DOI 10.1007/0-387-24519-7_4; Acs ZJ, 2005, SMALL BUS ECON, V24, P323, DOI 10.1007/s11187-005-1998-4; ANDERSON P, 1990, ADMIN SCI QUART, V…	84	3	3	3	16	ROUTLEDGE JOURNALS, TAYLOR & FRANCIS LTD	ABINGDON	2-4 PARK SQUARE, MILTON PARK, ABINGDON OX14 4RN, OXON, ENGLAND	0963-8199	1469-9559		J INT TRADE ECON DEV	J. Int. Trade Econ. Dev.		2016	25	2
J	Williams, J				Williams, James			Poor Men with Money On the Politics of Not Studying the Poorest of the Poor in Urban South Africa	CURRENT ANTHROPOLOGY			English	Article							ANTHROPOLOGY; RELEVANCE; VIOLENCE; POVERTY; YOUTH		Poverty and violence crisscross ethnographies of the African city. This is especially pronounced in anthropological research from South Africa, where considerable efforts are made to describe and document poverty and violence across segregated cityscapes. Correlations between poverty and vulnerability are often asserted in the literature: the "poorest of the poor" are presented repeatedly as the …	[Williams, James] Zayed Univ, Dept Humanities & Social Sci, Anthropol, Dubai, U Arab Emirates	Williams, J (corresponding author), Zayed Univ, Dept Humanities & Social Sci, Anthropol, POB 19282, Dubai, U Arab Emirates.	james.williams@zu.ac.ae			National Science FoundationNational Science Foundation (NSF); Social Science Research Council	This article is based on research funded by the National Science Foundation and the Social Science Research Council. I thank Veena Das and Shalini Randeria for their suggestions and support in the writing and rewriting of this article and for inviting me to participate in the Wenner-Gren Symposium in September 2013. I also thank Anupama Rao and Charlotte Bruckermann for their comments and feedbac…	Becker H, 2007, ANTHROPOL SOUTH AFR, V30, P85; Bekker Simon, 2008, RES REPORT; Carrithers M, 2005, CURR ANTHROPOL, V46, P433, DOI 10.1086/428801; Cole J, 2005, J SOC HIST, V38, P891, DOI 10.1353/jsh.2005.0051; Comaroff J, 1999, AM ETHNOL, V26, P279, DOI 10.1525/ae.1999.26.2.279; Crush J., 2000, Canadian Journal of African Studies, V34, P1, DOI 10.2307/486103; Das V, 2015, CURR ANTHROPOL, V56, pS3…	47	3	3	0	7	UNIV CHICAGO PRESS	CHICAGO	1427 E 60TH ST, CHICAGO, IL 60637-2954 USA	0011-3204	1537-5382		CURR ANTHROPOL	Curr. Anthropol.	OCT	2015	56			11
J	Zhuravleva, NA				Zhuravleva, N. A.			BUSINESSMEN VALUE ORIENTATIONS DYNAMICS IN CONDITIONS OF MACROSOCIAL CHANGES	PSIKHOLOGICHESKII ZHURNAL			Russian	Article						value orientations; terminal values; instrumental values; businessmen; Russian society; socioeconomic changes			There are presented the results of the research of the structure and dynamics of the Russian entrepreneurs' value orientations. The interrogation included 574 opinions of the Moscow businessmen of various branches of small business during six research "slices" were interviewed 574 people. According to the results of a study 1994-2006, there was a significant dynamics in the value consciousness of…	RAS, Inst Psychol, Moscow, Russia	Zhuravleva, NA (corresponding author), RAS, Inst Psychol, Moscow, Russia.						BURYISHKIN PA, 1990, MOSKVA KUPECHESKAYA; CHILINGIR EYU, 2010, LICHNOST KULTURA OBS, V4, P329; CHIRIKOVA AE, 1997, LIDERYI ROSSIYSKOGO; CYPAARIEEA HA, 2012, SOVREMENNAYA LICHNOS, P200; DEYNEKA OS, 2000, EKONOMICHESKAYA PSIH; DEYNEKA OS, 2003, EZHEGODNIK ROSSIYSKO, P38; DYIRIN SP, 2005, SOVREMENNAYA ROSSIYS; FEDORKOVA IR, 2000, AVTOREF DISS KAND PS; FIDRYA ES, 2007, DISS KAND SOTSIOL NA; GRACHEV A…	70	3	3	0	1	MEZHDUNARODNAYA KNIGA	MOSCOW	39 DIMITROVA UL., MOSCOW, 113095, RUSSIA	0205-9592			PSIKHOL ZH	Psikhologicheskii Zhurnal	JAN-FEB	2015	36	1
J	Agatiello, OR				Agatiello, Osvaldo R.			The world is one and all things are in it	MANAGEMENT DECISION			English	Article						Environmental management; Conservation; Governance; Globalization			Purpose - This paper aims to suggest that a more ambitious and structured ethical approach for environmental decision making is essential at this point of maturity of public and private management. Design/methodology/approach - The paper reflects on the fact that the citizen-consumer of our time views the environment as an integral part of collective well being and as a repository of public goods…	Geneva Sch Diplomacy & Int Relat, Geneva, Switzerland	Agatiello, OR (corresponding author), Geneva Sch Diplomacy & Int Relat, Geneva, Switzerland.	o.agatiello@genevadiplomacy.com					ALPHONSE X, 1974, SIETE PARTIDAS NUEVA; AUGUSTINE S, 1966, WRITINGS SAINT AUGUS; Bauman Zygmunt, 2008, DOES ETHICS HAVE CHA; Bowie NE, 1999, BUSINESS ETHICS KANT; CALLAHAN JC, 1997, BLACKWELL ENCY DICT; CARTER S, 1998, CIVILITY MANNERS MOR; CICERO MT, 1913, OFFICIIS 45 44 BC; Commenges D, 2002, STAT METHODS MED RES, V11, P167, DOI 10.1191/0962280202sm279ra; Daly H. E, 1994, COMMON GOOD REDIRECT; …	34	3	3	1	8	EMERALD GROUP PUBLISHING LTD	BINGLEY	HOWARD HOUSE, WAGON LANE, BINGLEY BD16 1WA, W YORKSHIRE, ENGLAND	0025-1747	1758-6070		MANAGE DECIS	Manag. Decis.		2009	47	7
J	Wilk, K				Wilk, Katarzyna			Embeddedness of Social and Economic Relations in Systemic Transformation. Long-Term Evidence From the Post-Communist Transition in Poland, 1988-2003	POLISH SOCIOLOGICAL REVIEW			English	Article						Friendship ties; social networks; status attainment; entrepreneurship; (dis)embeddedness of economic relations in social relations	NETWORKS; ENTREPRENEURSHIP; RESOURCES; MOBILITY; JOB		This paper intervenes in the Granovetter-Polanyi debate by reassessing the level of embeddedness of social and economic relations under conditions of systemic transition. Using panel data collected in Poland, this analysis examines this relationship for three distinct periods of transition: initial (1988-1993), advanced (1993-1998), and post-transitional (1998-2003). This paper shows that during …	[Wilk, Katarzyna] Yale Univ, Dept Sociol, New Haven, CT 06520 USA	Wilk, K (corresponding author), Commiss European Communities, BEPA, B-1049 Brussels, Belgium.	katarzynawilk7@gmail.com					Angelusz R., 2001, SOCIAL CAPITAL THEOR; ANGELUSZ R, 1991, VALUES NETWORKS CULT; BALCEROWICZ E, 1998, BARRIERS ENTRY GROWT; Berk RA, 2004, REGRESSION ANAL CONS; Biggart NW, 2001, AM J ECON SOCIOL, V60, P471, DOI 10.1111/1536-7150.00071; Birner J, 1999, AM J ECON SOCIOL, V58, P749, DOI 10.1111/j.1536-7150.1999.tb03393.x; Bourdieu Pierre., 1993, SOCIOLOGY QUESTION; Buerkle K, 2002, AM J ECON SOCIOL…	56	3	3	0	10	POLSKIE TOWARZYSTWO SOCJOLOGICZNE-POLISH SOCIOLOGICAL ASSOC	WARSAW	UL NOWY SWIAT 72, POK 216, WARSAW, 00330, POLAND	1231-1413			POL SOCIOL REV	Pol. Sociol. Rev.		2009		165
J	Sarracino, F; Fumarco, L				Sarracino, Francesco; Fumarco, Luca			Assessing the Non-financial Outcomes of Social Enterprises in Luxembourg	JOURNAL OF BUSINESS ETHICS			English	Article						Social enterprises; Subjective well-being; Non-economic outcomes	HAPPINESS; HEALTH; COOPERATIVES; ECONOMY		By addressing social issues, rather than maximizing profits, social enterprises are said to contribute to the well-being of societies. In this paper, we test whether social enterprises fulfil this expectation. The paper applies regression analysis to a unique dataset obtained by merging survey data from the Global Entrepreneurship Monitor with official statistics on social enterprises in Luxembou…	[Sarracino, Francesco; Fumarco, Luca] STATEC Res, Inst Natl Stat & Etud Econ Grand Duche Luxembourg, 13 Rue Erasme, L-2013 Luxembourg, Luxembourg; [Sarracino, Francesco] Natl Res Univ Higher Sch Econ, Lab Comparat Social Res LCSR, 20 Myasnitskaya, Moscow 101000, Russia	Sarracino, F (corresponding author), STATEC Res, Inst Natl Stat & Etud Econ Grand Duche Luxembourg, 13 Rue Erasme, L-2013 Luxembourg, Luxembourg.; Sarracino, F (corresponding author), Natl Res Univ Higher Sch Econ, Lab Comparat Social Res LCSR, 20 Myasnitskaya, Moscow 101000, Russia.	francesco.sarracino@statec.etat.lu	Fumarco, Luca/AAS-5684-2020	Fumarco, Luca/0000-0002-6236-0197	Observatoire de la Competitivite, Ministere de l'Economie, DG Competitivite; Russia (LCSR Russian Government) [11.G34.31.0024]	The authors wish to thank Andrea Gosset for her precious contribution on an earlier version of this work, and acknowledge the financial support of the Observatoire de la Competitivite, Ministere de l'Economie, DG Competitivite. F. Sarracino: Russia (LCSR Russian Government Grant #11.G34.31.0024 from November 28, 2010).	Alesina A, 2004, J PUBLIC ECON, V88, P2009, DOI 10.1016/j.jpubeco.2003.07.006; Allegrezza S., 2005, STATEC WORKING PAPER; Amin A, 2009, SOC ENTERP J, V5, P30, DOI 10.1108/17508610910956390; [Anonymous], 2013, SOCIAL EC SOCIAL ENT; [Anonymous], 2002, C EUROPEAN STANDING; [Anonymous], 2013, OECD GUIDELINES MEAS; Becchetti L, 2010, EC SOCIAL RESPONSIBI; Blakemore K, 2003, SOCIAL POLICY INTRO, P2; Bl…	70	2	2	8	8	SPRINGER	DORDRECHT	VAN GODEWIJCKSTRAAT 30, 3311 GZ DORDRECHT, NETHERLANDS	0167-4544	1573-0697		J BUS ETHICS	J. Bus. Ethics	SEP	2020	165	3
[truncated: 120 more rows]
[truncated: 18 more columns]
